# Supplementary material for: Synthesis of amides from acid chlorides and amines in the bio-based solvent Cyrene™
Source: Royal Society of Chemistry journal article supplement (doi:10.1039/c9gc01180c), 2019-01-01

## **A Molar Efficient Synthesis of Amides from Acid Chlorides and Amines in the Bioavailable Solvent Cyrene**

Thomas W. Bousfield, Katharine P. R. Pearce, Simbarashe B. Nyamini, Athanasios Angelis-Dimakis and Jason E. Camp\*

Department of Chemical Sciences, University of Huddersfield, Queensgate, Huddersfield, U.K.

[j.e.camp@hud.ac.uk](mailto:j.e.camp@hud.ac.uk)

|             |                                                        |                   |
|-------------|--------------------------------------------------------|-------------------|
| <b>I.</b>   | <b>General Experimental Information</b>                | <b>S1</b>         |
| <b>II.</b>  | <b>Cyrene Hydration Study</b>                          | <b>S2</b>         |
| <b>III.</b> | <b>Cyrene / Water Temperature Study</b>                | <b>S7</b>         |
| <b>IV.</b>  | <b>Preparation of Amides 4a,b,d,e,h, 5a-k and 6a-k</b> | <b>S8</b>         |
| <b>V.</b>   | <b>References</b>                                      | <b>S21</b>        |
| <b>VI.</b>  | <b><sup>1</sup>H and <sup>13</sup>C NMR Data</b>       | <b>S22</b>        |
| <b>VII.</b> | <b>Excel molar efficiency calculator</b>               | <b>appendix 1</b> |

### **I. General Experimental Information**

Unless otherwise indicated, all commercially available reagents and solvents were used directly from the supplier without further purification. <sup>1</sup>H NMR, <sup>13</sup>C NMR and <sup>19</sup>F NMR were recorded at ambient temperature in CDCl<sub>3</sub> (7.27 ppm). Chemical shift values are expressed as parts per million (ppm) and J values are in Hertz. Splitting patterns are indicated as s: singlet, d: doublet, t: triplet, q: quartet or combination, br.s broad singlet or m: multiplet. The melting points reported are uncorrected. All reactions were performed in 5 mL microwave vials with Teflon coated caps.

## II. Cyrene Hydration Study

### A. NMR analysis of Cyrene in $\text{CDCl}_3$ at 1 M concentration

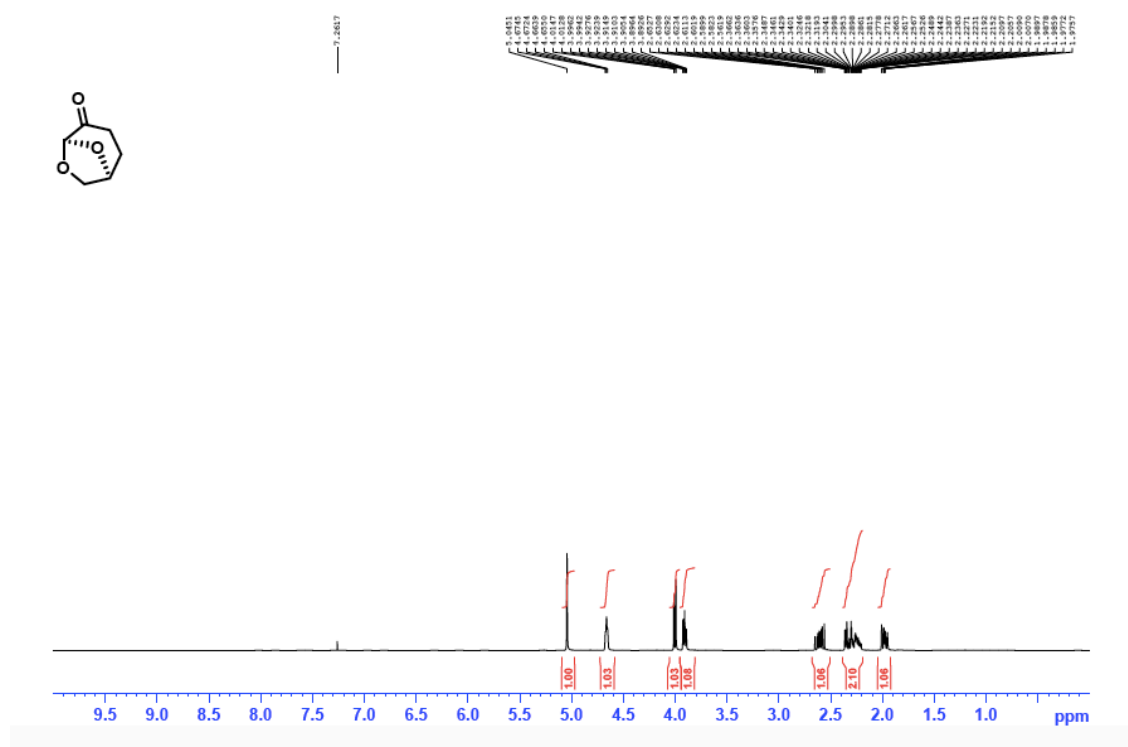

Figure S1 Proton NMR of Cyrene in  $\text{CDCl}_3$  at 1 M concentration

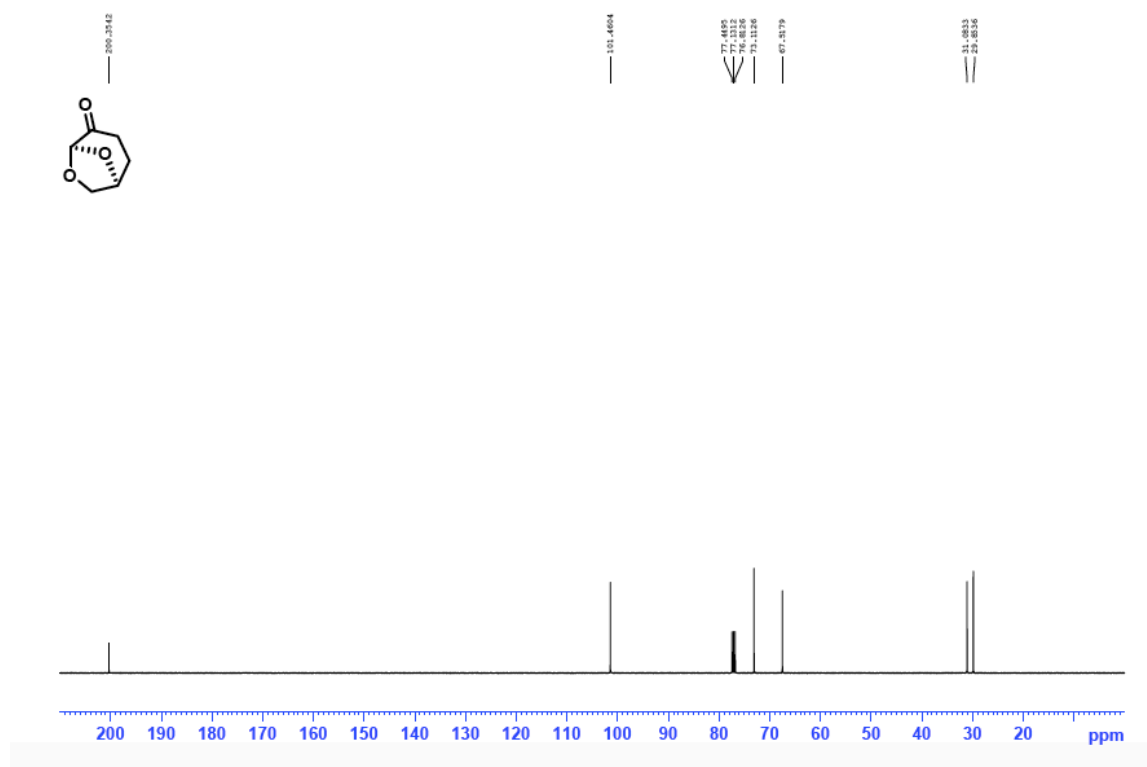

Figure S2 Carbon 13 NMR of Cyrene in  $\text{CDCl}_3$  at 1 M concentration

B. NMR analysis of a 10:1 v/v mixture of D<sub>2</sub>O:Cyrene mixture.

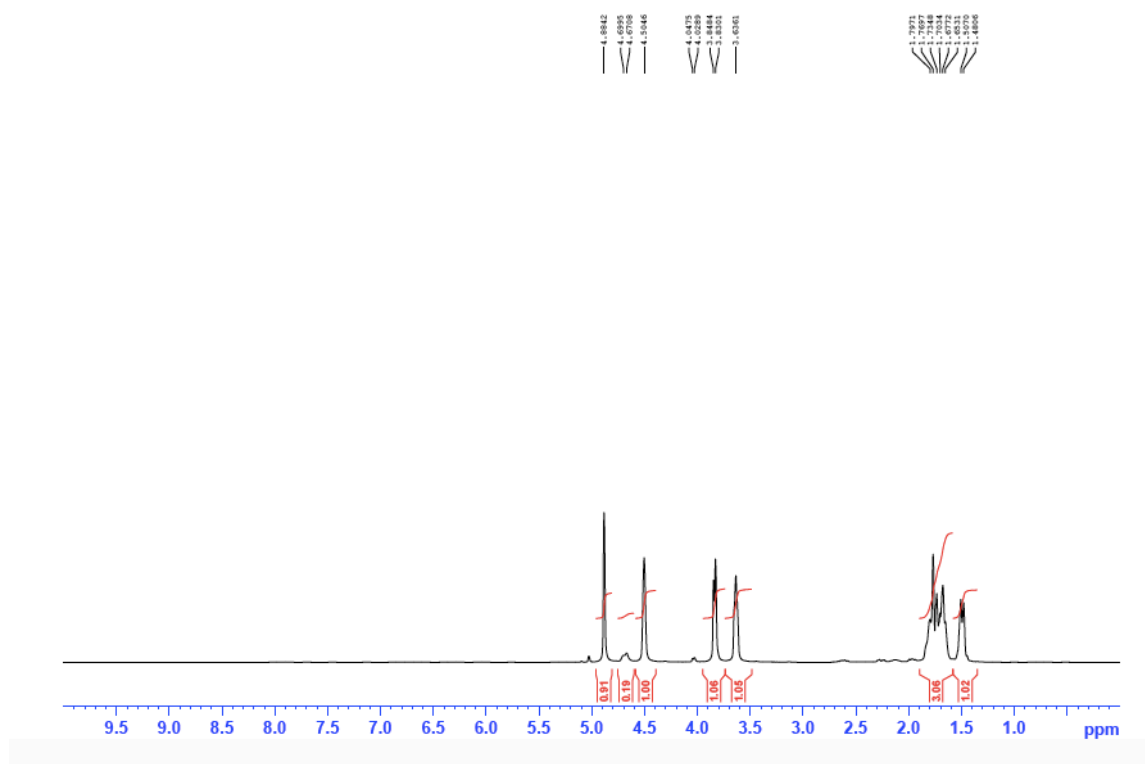

Figure S3 Proton NMR analysis of a 10:1 v/v mixture of D<sub>2</sub>O:Cyrene mixture

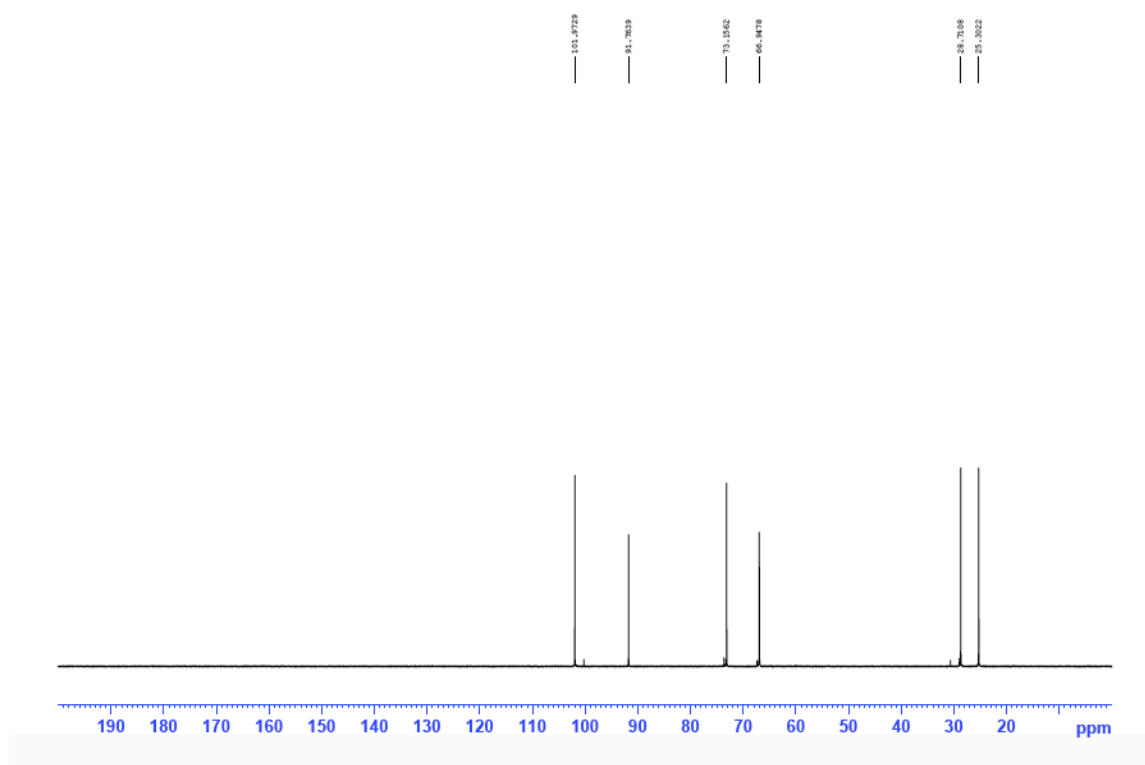

Figure S4 Carbon 13 NMR analysis of a 10:1 v/v mixture of D<sub>2</sub>O:Cyrene mixture

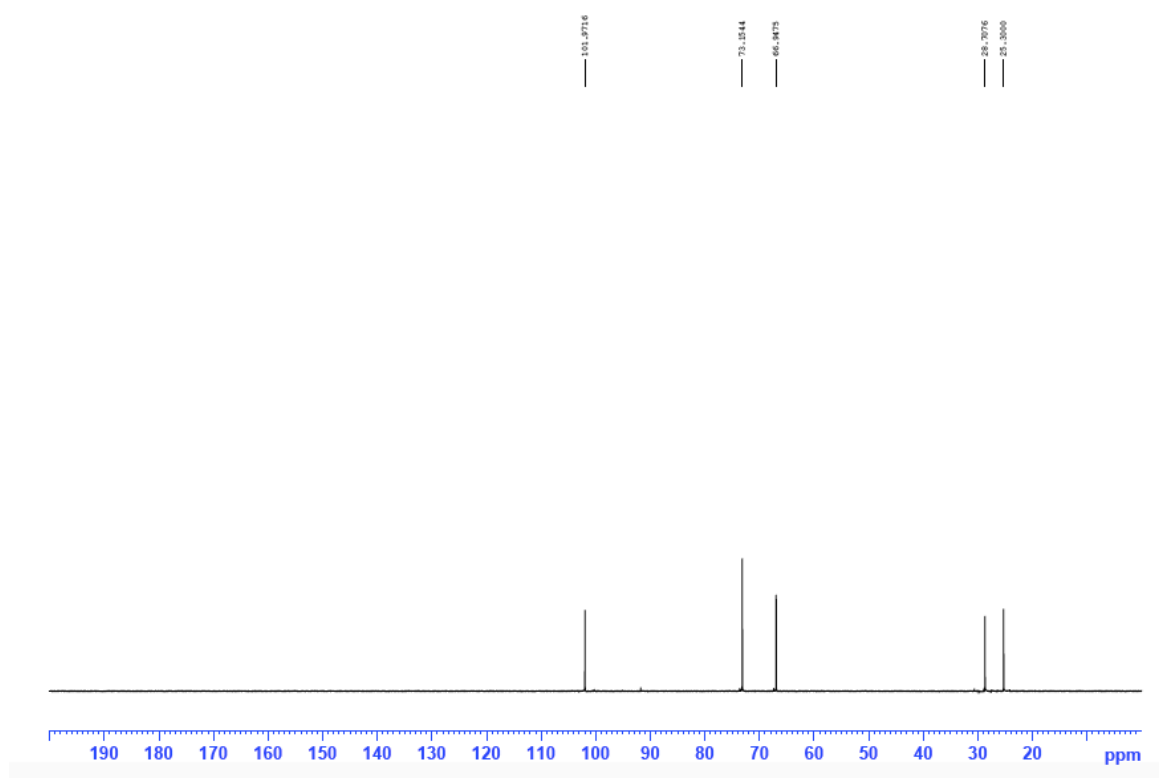

Figure S5  $^{13}\text{C}$  DEPT90 NMR analysis of a 10:1 v/v mixture of  $\text{D}_2\text{O}$ :Cyrene mixture

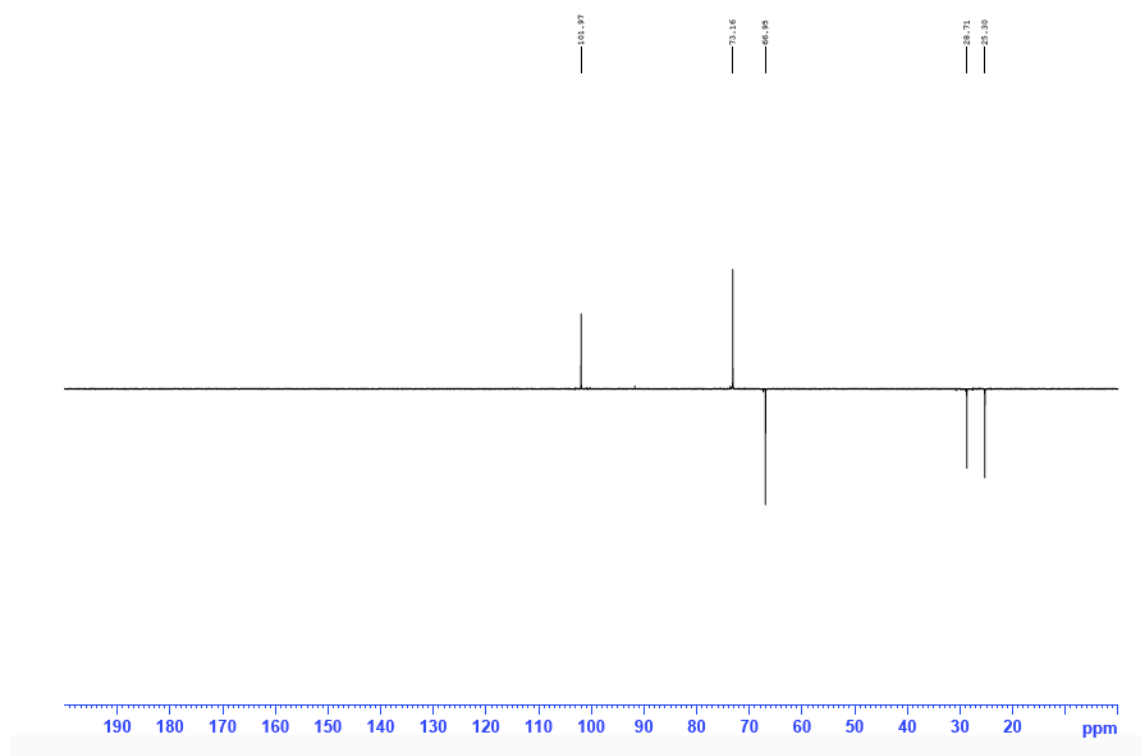

Figure S6  $^{13}\text{C}$  DEPT135 NMR analysis of a 10:1 v/v mixture of  $\text{D}_2\text{O}$ :Cyrene mixture

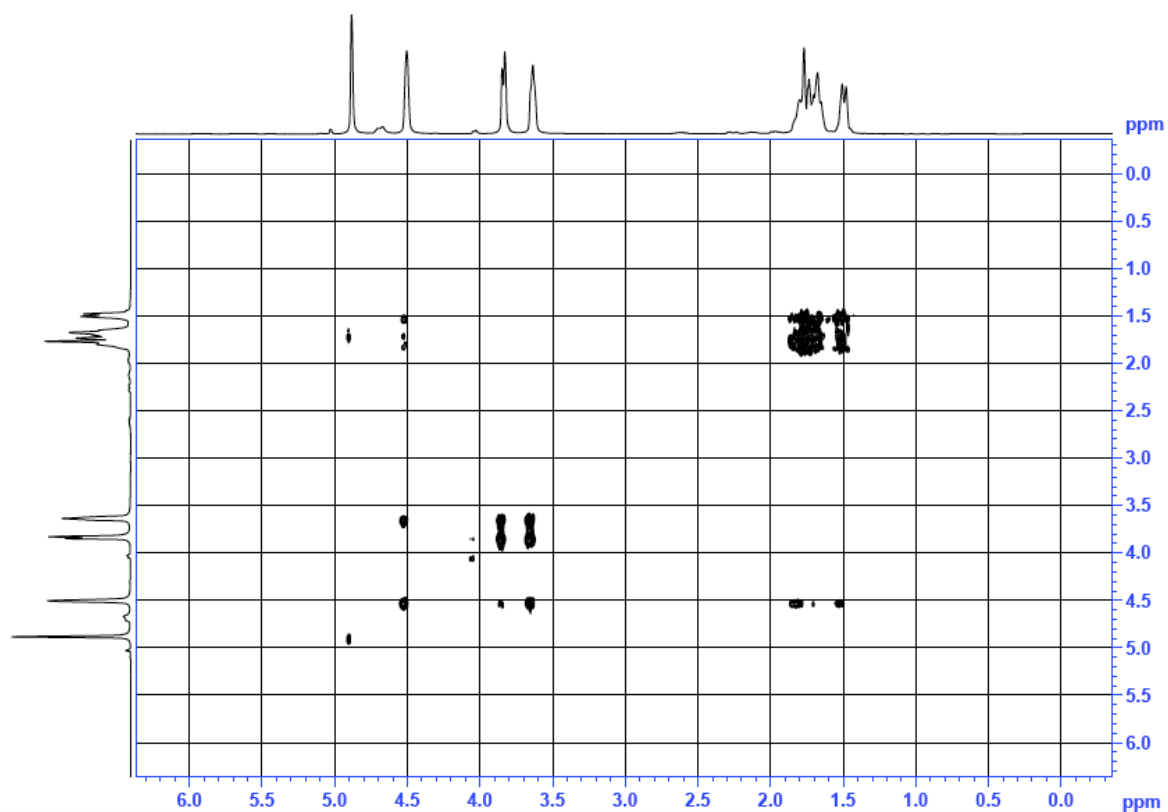

Figure S7 COSY NMR analysis of a 10:1 v/v mixture of D<sub>2</sub>O:Cyrene mixture

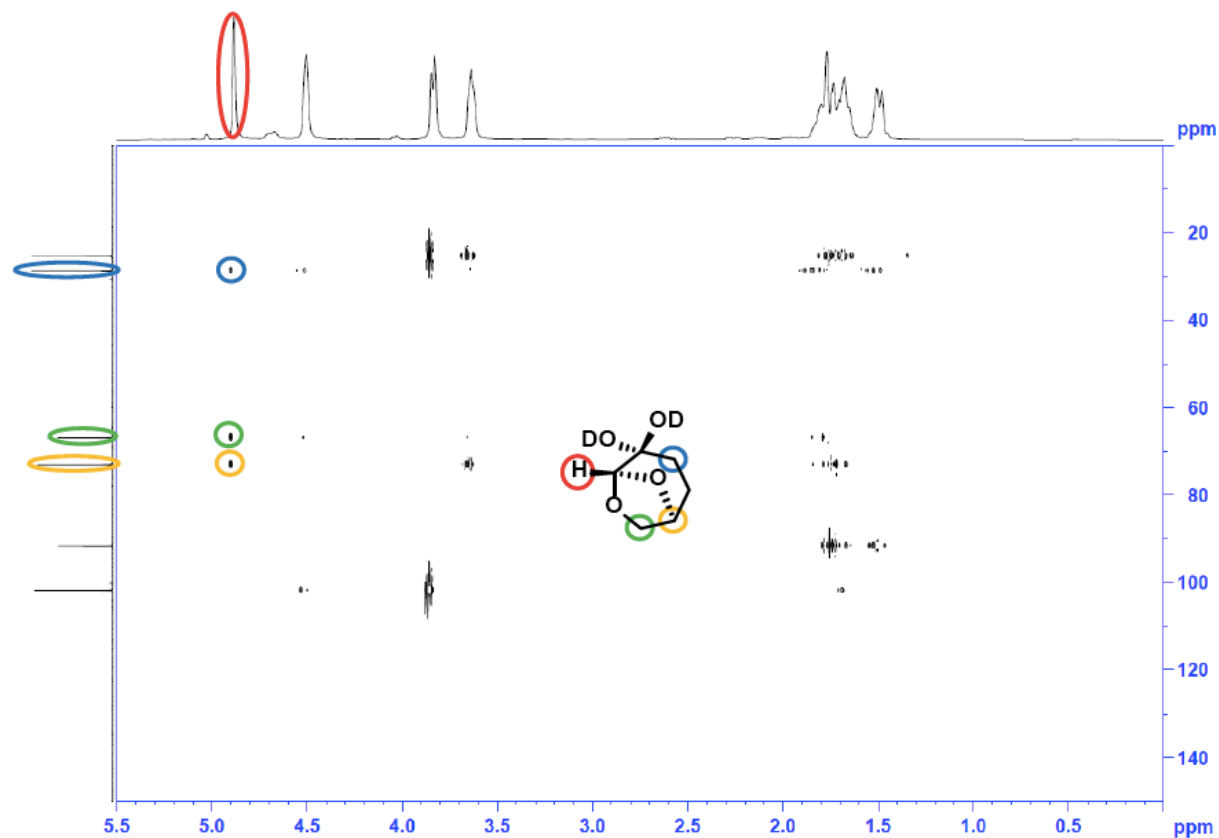

Figure S8 HMBC NMR analysis of a 10:1 v/v mixture of D<sub>2</sub>O:Cyrene mixture

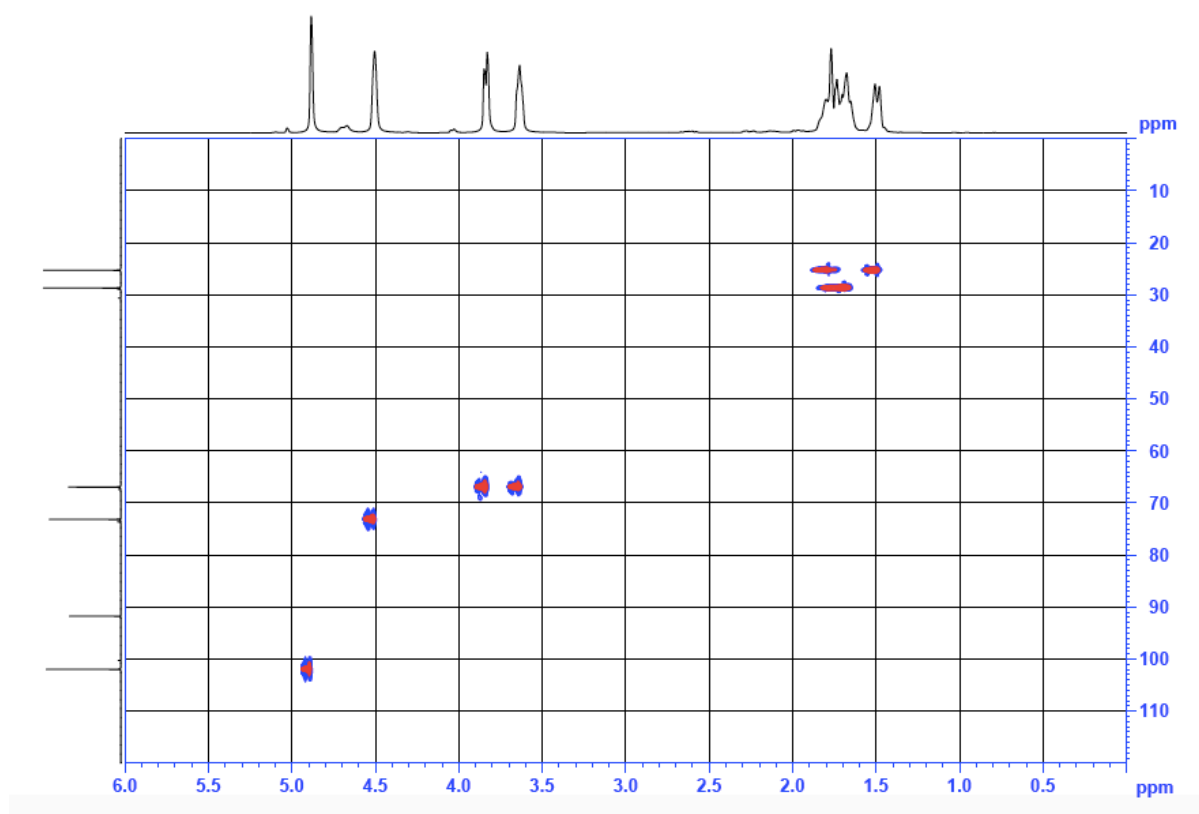

Figure S9 HSQC NMR analysis of a 10:1 v/v mixture of D<sub>2</sub>O:Cyrene mixture

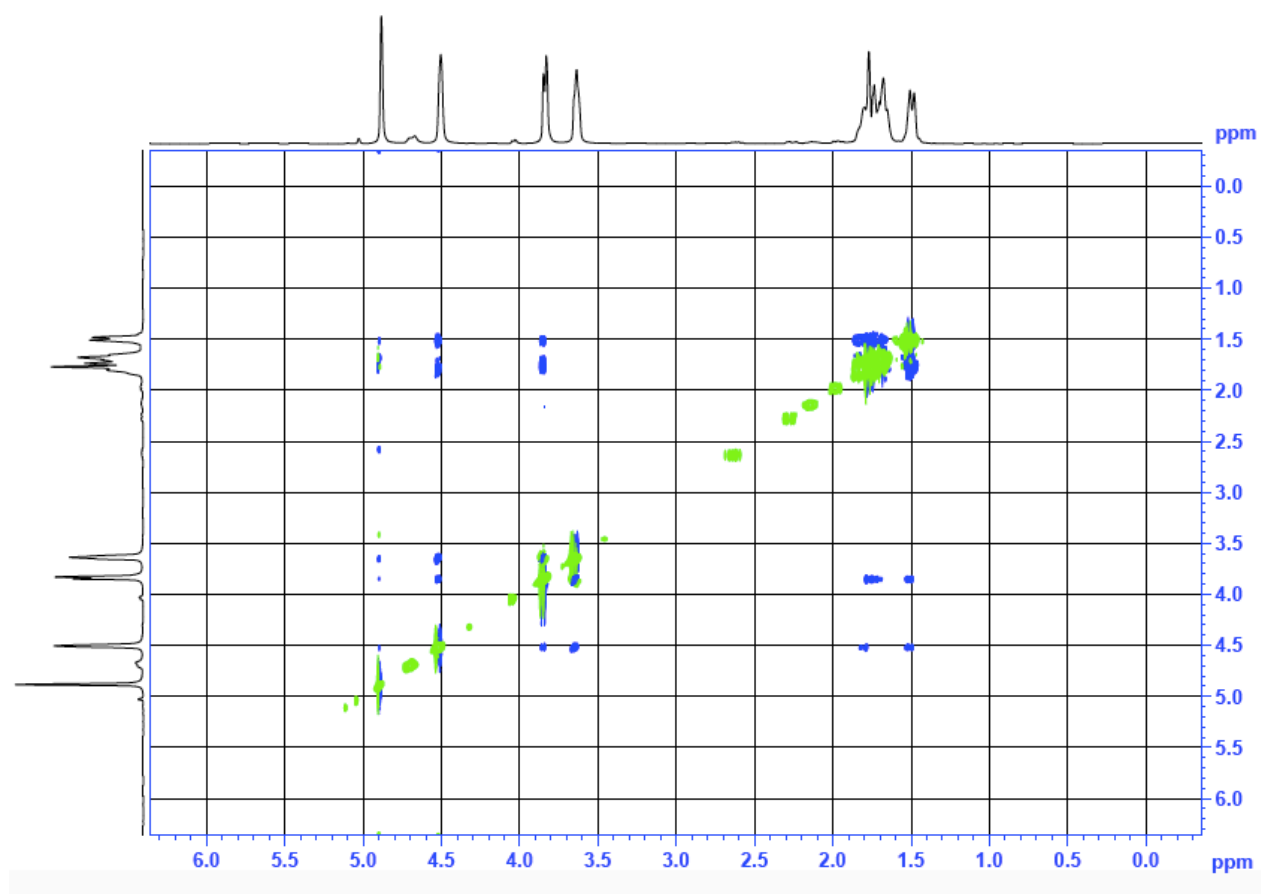

Figure S10 NOESY NMR analysis of a 10:1 v/v mixture of D<sub>2</sub>O:Cyrene mixture

- B. A series of D<sub>2</sub>O:Cyrene mixtures were made up in an NMR tube at rt and subjected to proton analysis. Peaks at approximately 4.6 vs 4.8 ppm and 4.9 vs 5.1 ppm were integrated and the average difference in peak area use to create Figure 2 in the main text (also see, Figure S11).

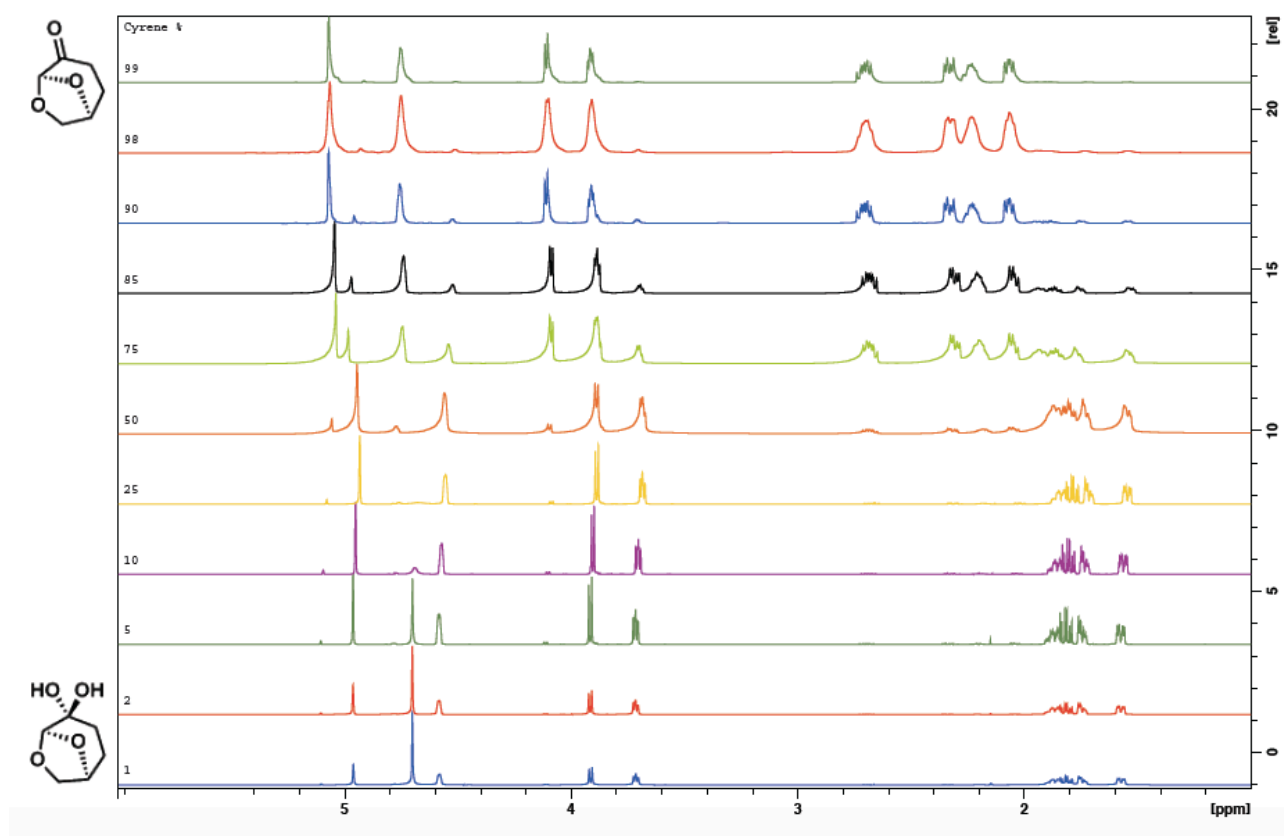

Figure S11 Stacked proton NMRs of various D<sub>2</sub>O to Cyrene mixtures.

### III. Cyrene / Water Temperature Study

- A. Water (2.5 mL) was added to Cyrene (2.5 mL) with stirring at room temperature.

| Entry | Time (min) | Temperature (°C) |       | Av. Temp (°C) |
|-------|------------|------------------|-------|---------------|
|       |            | Exp 1            | Exp 2 |               |
| 1     | 0          | 27.0             | 27.0  | 27.0          |
| 2     | 1          | 35.5             | 40.0  | 37.8          |
| 3     | 2          | 41.0             | 41.5  | 41.3          |
| 4     | 3          | 40.0             | 40.0  | 40.0          |
| 5     | 4          | 38.5             | 38.8  | 38.7          |
| 6     | 5          | 37.0             | 37.5  | 37.3          |
| 7     | 6          | 36.0             | 36.2  | 36.1          |
| 8     | 7          | 34.9             | 35.2  | 35.1          |
| 9     | 8          | 34.0             | 34.8  | 34.4          |
| 10    | 9          | 33.0             | 34.0  | 33.5          |
| 11    | 10         | 32.5             | 33.2  | 32.9          |
| 12    | 11         | 32.0             | 32.7  | 32.4          |

|    |    |      |      |      |
|----|----|------|------|------|
| 13 | 12 | 31.4 | 32.0 | 31.7 |
| 14 | 13 | 30.8 | 31.7 | 31.3 |
| 15 | 14 | 30.2 | 31.2 | 30.7 |
| 16 | 15 | 30.0 | 30.9 | 30.5 |
| 17 | 16 | 30.0 | 30.5 | 30.3 |
| 18 | 17 | 29.8 | 30.2 | 30.0 |
| 19 | 18 | 29.2 | 30.0 | 29.6 |
| 20 | 19 | 29.0 | 29.9 | 29.5 |
| 21 | 20 | 28.8 | 29.8 | 29.3 |
| 22 | 21 | 28.7 | 29.7 | 29.2 |
| 23 | 22 | 28.5 | 29.4 | 29.0 |
| 24 | 23 | 28.3 | 29.1 | 28.7 |
| 25 | 24 | 28.1 | 29.0 | 28.6 |
| 26 | 25 | 28.0 | 28.9 | 28.5 |

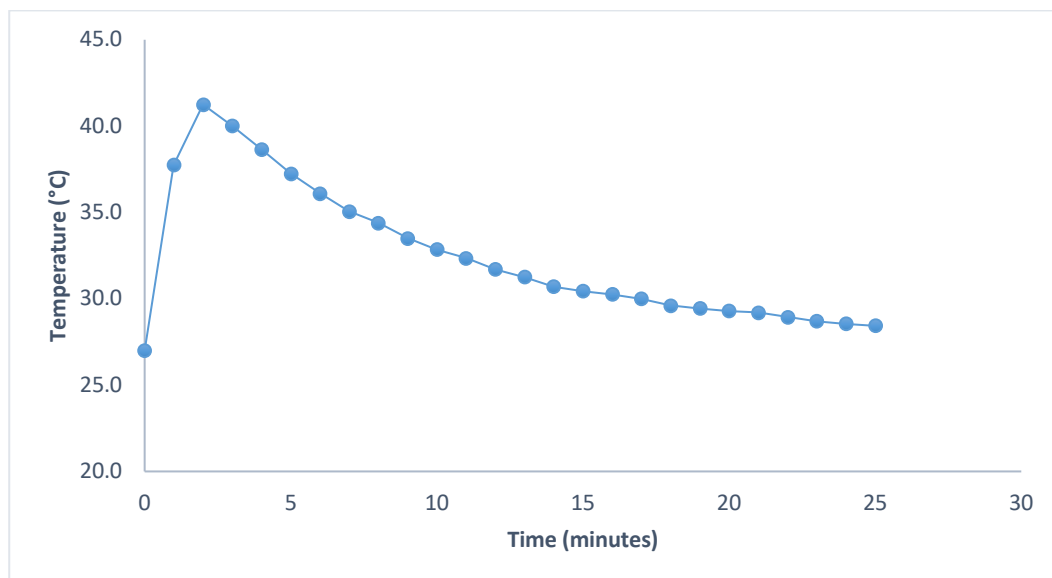

**Figure S12** Change in temperature vs. time when water (2.5 mL) was added to Cyrene (**1**, 2.5 mL)

#### IV. Preparation of Amides **4a,b,d,e,h**, **5a-k** and **6a-k**

\* Note – isolated yields for compounds that were directly precipitated from the aqueous Cyrene solution, **5a-k** and **6a-k**, were obtained by the following protocol: To the solid was added ethyl acetate (5 mL) and the resultant solution was dried over sodium sulphate and the solvent was removed under reduced pressure.



(4-Fluorophenyl)(pyrrolidin-1-yl)methanone<sup>14</sup> **4a**

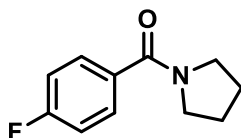

*Method 1:* To a stirred solution of 4-fluorobenzoyl chloride (59  $\mu$ L, 0.5 mmol) in Cyrene (0.5 mL) at 0 °C were added triethylamine (77  $\mu$ L, 0.55 mmol) and pyrrolidine (42  $\mu$ L, 0.5 mmol) and the resultant mixture was stirred at r.t. for 1 h. The solution was purified by flash chromatography column on silica gel (30% EtOAc in hexane  $\rightarrow$  70% EtOAc in hexane) to afford (4-fluorophenyl)(pyrrolidin-1-yl)methanone (**4a**, 72 mg, 75%) as a colourless solid.

*Method 2:* Method To a stirred solution of 4-fluorobenzoyl chloride (59  $\mu$ L, 0.5 mmol) in Cyrene (0.5 mL) at 0 °C were added triethylamine (77  $\mu$ L, 0.55 mmol) and pyrrolidine (42  $\mu$ L, 0.5 mmol) and the resultant mixture was stirred at r.t. for 1 h. The solution was diluted with EtOAc (5 mL) and added to water (10 mL). The mixture was extracted with EtOAc (2 x 10 mL) and the organic extracts were combined and dried over Na<sub>2</sub>SO<sub>4</sub> and the solvent was removed under reduced pressure and the residue purified by flash chromatography column on silica gel (30% EtOAc in hexane  $\rightarrow$  70% EtOAc in hexane) to afford (4-fluorophenyl)(pyrrolidin-1-yl)methanone (**4a**, 88 mg, 91%) as a colourless solid.

mp: 87-90 °C; <sup>1</sup>H NMR (400 MHz, CDCl<sub>3</sub>):  $\delta$  7.51-7.47 (m, 2H), 7.05-7.01 (m, 2H), 3.58 (t,  $J$  = 6.8 Hz, 2H), 3.38 (t,  $J$  = 6.6 Hz, 2H), 1.95-1.80 (m, 4H); <sup>19</sup>F NMR (376 MHz, CDCl<sub>3</sub>):  $\delta$  -110.41 (s, 1F); <sup>13</sup>C (100 MHz, CDCl<sub>3</sub>):  $\delta$  168.6, 163.4 (d,  $J_{C-F}$  = 248 Hz), 133.2 (d,  $J_{C-F}$  = 3 Hz), 129.4 (d,  $J_{C-F}$  = 8 Hz), 115.2 (d,  $J_{C-F}$  = 22 Hz), 49.7, 46.3, 26.4, 24.4; IR 3064, 2980, 2956, 2886, 1621, 1601, 1425 cm<sup>-1</sup>; HRMS (DualESI-TOFMS)  $m/z$  Calcd. for [C<sub>11</sub>H<sub>13</sub>FNO]<sup>+</sup> 194.0976; found 194.0975.

(3-Fluorophenyl)(pyrrolidin-1-yl)methanone<sup>14</sup> **4b**

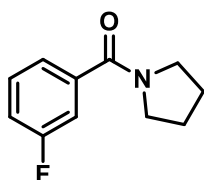

To a stirred solution of 3-fluorobenzoyl chloride (61  $\mu$ L, 0.5 mmol) in Cyrene (0.5 mL) at 0 °C were added triethylamine (77  $\mu$ L, 0.55 mmol) and pyrrolidine (42  $\mu$ L, 0.5 mmol) and the resultant mixture was stirred at r.t. for 1 h. The solution was purified by flash chromatography column on silica gel (30% EtOAc in hexane  $\rightarrow$  70% EtOAc in hexane) to afford (3-fluorophenyl)(pyrrolidin-1-yl)methanone (**4b**, 73 mg, 76%) as a colourless oil.

<sup>1</sup>H NMR (400 MHz, CDCl<sub>3</sub>):  $\delta$  7.36-7.31 (m, 1H), 7.26-7.24 (m, 1H), 7.20-7.16 (m, 1H), 7.09-7.04 (m, 1H), 3.59 (t,  $J$  = 6.9 Hz, 2H), 3.38 (t,  $J$  = 6.5 Hz, 2H), 1.96-1.81 (m, 4H); <sup>19</sup>F NMR (376 MHz, CDCl<sub>3</sub>):  $\delta$  -112.30 (s, 1F); <sup>13</sup>C (100 MHz, CDCl<sub>3</sub>):  $\delta$  168.2 (d,  $J_{C-F}$  = 2 Hz), 162.4 (d,  $J_{C-F}$  = 246 Hz), 139.2 (d,  $J_{C-F}$  = 7 Hz), 130.0 (d,  $J_{C-F}$  = 8 Hz), 122.8 (d,  $J_{C-F}$  = 3 Hz), 116.7 (d,  $J_{C-F}$  = 21 Hz), 114.3 (d,  $J_{C-F}$  = 23 Hz), 49.5, 46.2, 26.4, 24.4; IR 3067, 2973, 2876, 1621, 1581, 1445 cm<sup>-1</sup>; HRMS (DualESI-TOFMS)  $m/z$  Calcd. for [C<sub>11</sub>H<sub>13</sub>FNO]<sup>+</sup> 194.0976; found 194.0976.

4-Bromo-*N*-phenylbenzamide<sup>14</sup> **4d**

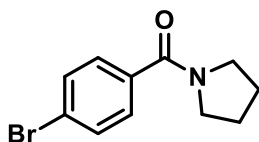

To a stirred solution of 4-bromobenzoyl chloride (110 mg, 0.5 mmol) in Cyrene (0.5 mL) at 0 °C were added triethylamine (77  $\mu$ L, 0.55 mmol) and pyrrolidine (42  $\mu$ L, 0.5 mmol) and the resultant mixture was stirred at r.t. for 1 h. The solution was purified by flash chromatography column on silica gel (30% EtOAc in hexane  $\rightarrow$  70% EtOAc in hexane) to afford 4-bromo-*N*-phenylbenzamide (**4d**, 64 mg, 50%) as a brown oil.

<sup>1</sup>H NMR (400 MHz, CDCl<sub>3</sub>):  $\delta$  7.53-7.52 (m, 2H), 7.41-7.39 (m, 2H), 3.62 (t,  $J$  = 6.9 Hz, 2H), 3.40 (t,  $J$  = 6.6 Hz, 2H), 1.99-1.84 (m, 4H); <sup>13</sup>C (100 MHz, CDCl<sub>3</sub>):  $\delta$  168.6, 136.0, 131.5, 128.9, 124.1, 49.6, 46.3, 26.4, 24.4; IR 2970, 2874, 162, 1417 cm<sup>-1</sup>; HRMS (DualESI-TOFMS)  $m/z$  Calcd. for [C<sub>11</sub>H<sub>13</sub>BrNO]<sup>+</sup> 254.0175; found 254.0176.

(3,4-Dimethoxyphenyl)(pyrrolidin-1-yl)methanone<sup>15</sup> **4e**

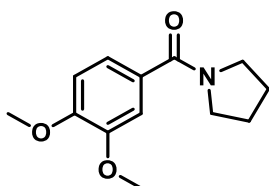

To a stirred solution of 3,4-dimethoxybenzoyl chloride (100 mg, 0.5 mmol) in Cyrene (0.5 mL) at 0 °C were added triethylamine (77  $\mu$ L, 0.55 mmol) and pyrrolidine (42  $\mu$ L, 0.5 mmol) and the resultant mixture was stirred at r.t. for 1 h. The solution was purified by flash chromatography column on silica gel (30% EtOAc in hexane  $\rightarrow$  70% EtOAc in hexane) to afford (3,4-dimethoxyphenyl)(pyrrolidin-1-yl)methanone (**4e**, 81 mg, 68%) as a white oil.

<sup>1</sup>H NMR (400 MHz, CDCl<sub>3</sub>):  $\delta$  7.06-7.02 (m, 2H), 6.77 (d,  $J$  = 8.2 Hz, 1H), 3.81 (s, 6H), 3.54 (t,  $J$  = 6.8 Hz, 2H), 3.41 (t,  $J$  = 6.4 Hz, 2H), 1.88-1.77 (m, 4H); <sup>13</sup>C (100 MHz, CDCl<sub>3</sub>):  $\delta$  169.3, 150.2, 148.6, 129.5, 120.22, 110.9, 110.1, 55.9, 49.8, 46.3, 26.4, 24.4; IR 3430, 2970, 2935, 2878, 1610, 1578, 1510, 1453 cm<sup>-1</sup>; HRMS (DualESI-TOFMS)  $m/z$  Calcd. for [C<sub>13</sub>H<sub>17</sub>NO<sub>3</sub>Na]<sup>+</sup> 258.1101; found 258.1104.

Furan-2-yl(pyrrolidin-1-yl)methanone<sup>16</sup> **4h**

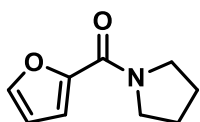

To a stirred solution of furoyl chloride (49  $\mu$ L, 0.5 mmol) in Cyrene (0.5 mL) at 0 °C were added triethylamine (77  $\mu$ L, 0.55 mmol) and pyrrolidine (42  $\mu$ L, 0.5 mmol) and the resultant mixture was stirred at r.t. for 1 h. The solution was purified by flash chromatography column on silica gel (30% EtOAc in hexane  $\rightarrow$  70% EtOAc in hexane) to afford furan-2-yl(pyrrolidin-1-yl)methanone (**4h**, 64 mg, 68%) as a colourless oil.

$^1\text{H}$  NMR (400 MHz,  $\text{CDCl}_3$ ):  $\delta$  7.46 (dd,  $J = 0.7$  Hz,  $J = 1.6$  Hz, 1H), 7.01 (dd,  $J = 0.6$  Hz,  $J = 3.5$  Hz, 1H), 6.44 (dd,  $J = 1.7$  Hz,  $J = 3.5$  Hz, 1H), 3.78 (t,  $J = 6.8$  Hz, 2H), 3.60 (t,  $J = 6.9$  Hz, 2H), 1.98-1.81 (m, 4H);  $^{13}\text{C}$  (100 MHz,  $\text{CDCl}_3$ ):  $\delta$  158.1, 148.7, 144.0, 115.7, 111.3, 47.8, 47.0, 26.6, 23.7; IR 3486, 3110, 2971, 2877, 1611, 1479, 1413  $\text{cm}^{-1}$ ; HRMS (DualESI-TOFMS)  $m/z$  Calcd. for  $[\text{C}_9\text{H}_{11}\text{NO}_2\text{Na}]^+$  188.0682; found 188.0683.

cyclopropyl(pyrrolidin-1-yl)methanone<sup>17</sup> **5j**

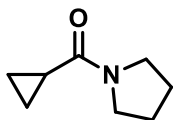

To a stirred solution of cyclopropanecarbonyl chloride (45  $\mu\text{L}$ , 0.5 mmol) in Cyrene (0.5 mL) at 0  $^\circ\text{C}$  were added triethylamine (77  $\mu\text{L}$ , 0.55 mmol) and pyrrolidine (42  $\mu\text{L}$ , 0.5 mmol) and the resultant mixture was stirred at r.t. for 1 h. The solution was purified by flash chromatography column on silica gel (30% EtOAc in hexane  $\rightarrow$  70% EtOAc in hexane) to afford cyclopropyl(pyrrolidin-1-yl)methanone (**4j**, 11 mg, 16%) as a colourless oil.

$^1\text{H}$  NMR (400 MHz,  $\text{CDCl}_3$ ):  $\delta$  3.60 (t,  $J = 6.8$  Hz, 2H), 3.45 (t,  $J = 6.9$  Hz, 1H), 1.98 (quin,  $J = 6.6$  Hz, 2H), 1.85 (quin,  $J = 6.8$  Hz, 2H), 1.64-1.58 (m, 1H), 1.00-0.97 (m, 2H);  $^{13}\text{C}$  (100 MHz,  $\text{CDCl}_3$ ):  $\delta$  170.1, 46.5, 46.0, 26.1, 24.5, 12.5, 7.3; IR 3438, 1615, 1451  $\text{cm}^{-1}$ ; HRMS (DualESI-TOFMS)  $m/z$  Calcd. for  $[\text{C}_8\text{H}_{14}\text{NO}]^+$  140.1070; found 140.1071.

4-Fluoro-*N*-phenylbenzamide<sup>1</sup> **5a**

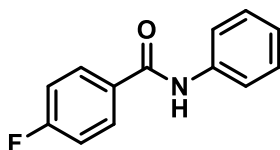

*Method 1:* To a stirred solution of 4-fluorobenzoyl chloride (59  $\mu\text{L}$ , 0.5 mmol) in Cyrene (0.5 mL) at 0  $^\circ\text{C}$  were added triethylamine (77  $\mu\text{L}$ , 0.55 mmol) and aniline (46  $\mu\text{L}$ , 0.5 mmol). The resultant mixture was allowed to warm to r.t. over 1 h. Water (5 mL) was added and the mixture was stirred for 1 h. The precipitate was filtered and washed with water. The residue was dissolved in EtOAc, dried over sodium sulfate and the solvent was removed under reduced pressure to afford 4-fluoro-*N*-phenylbenzamide (**5a**, 77 mg, 72%) as an off white solid.

*Method 2:* To a stirred solution of 4-fluorobenzoyl chloride (59  $\mu\text{L}$ , 0.5 mmol) in Cyrene (0.5 mL) at 0  $^\circ\text{C}$  were added triethylamine (77  $\mu\text{L}$ , 0.55 mmol) and aniline (46  $\mu\text{L}$ , 0.5 mmol). The resultant mixture was allowed to warm to r.t. over 1 h. Water (5 mL) was added and the mixture was stirred for 24 h. The precipitate was filtered and washed with water. The residue was dissolved in EtOAc, dried over sodium sulfate and the solvent was removed under reduced pressure to afford 4-fluoro-*N*-phenylbenzamide (**5a**, 98 mg, 91%) as an off white solid.

mp: 183-184  $^\circ\text{C}$ ;  $^1\text{H}$  NMR (400 MHz,  $\text{CDCl}_3$ ):  $\delta$  7.92-7.87 (m, 2H), 7.75 (br. s, 1H), 7.63 (d,  $J = 7.7$  Hz, 2H), 7.40-7.36 (m, 2H), 7.20-7.15 (m, 3H);  $^{19}\text{F}$  NMR (376 MHz,  $\text{CDCl}_3$ ):  $\delta$  -107.37 (s, 1F);  $^{13}\text{C}$  (100 MHz,  $\text{CDCl}_3$ ):  $\delta$  166.2, 164.2 (d,  $J_{\text{C-F}} = 97$  Hz), 137.7, 131.2 (d,  $J_{\text{C-F}} = 3$  Hz), 129.4 (d,  $J_{\text{C-F}} = 9$  Hz), 129.2, 120.2, 115.9 (d,  $J_{\text{C-F}} = 22$  Hz); IR 3347, 3082, 2919, 1654, 1587, 1524  $\text{cm}^{-1}$ ; HRMS (DualESI-TOFMS)  $m/z$  Calcd. for  $[\text{C}_{13}\text{H}_{11}\text{FNO}]^+$  216.0819; found 216.0825.

### 3-Fluoro-*N*-phenylbenzamide<sup>2</sup> **5b**

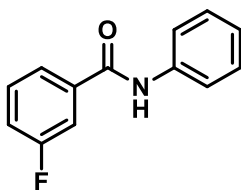

*Method 1:* To a stirred solution of 3-fluorobenzoyl chloride (59  $\mu$ L, 0.5 mmol) in Cyrene (0.5 mL) at 0 °C were added triethylamine (77  $\mu$ L, 0.55 mmol) and aniline (46  $\mu$ L, 0.5 mmol). The resultant mixture was allowed to warm to r.t. over 1 h. Water (5 mL) was added and the mixture was stirred for 1 h. The precipitate was filtered and washed with water. The residue was dissolved in EtOAc, dried over sodium sulfate and the solvent was removed under reduced pressure to afford 3-fluoro-*N*-phenylbenzamide (**5b**, 82 mg, 76%) as a white solid.

*Method 2:* To a stirred solution of 3-fluorobenzoyl chloride (59  $\mu$ L, 0.5 mmol) in Cyrene (0.5 mL) at 0 °C were added triethylamine (77  $\mu$ L, 0.55 mmol) and aniline (46  $\mu$ L, 0.5 mmol). The resultant mixture was allowed to warm to r.t. over 1 h. Water (5 mL) was added and the mixture was stirred for 24 h. The precipitate was filtered and washed with water. The residue was dissolved in EtOAc, dried over sodium sulfate and the solvent was removed under reduced pressure to afford 3-fluoro-*N*-phenylbenzamide (**5b**, 81 mg, 75%) as a white solid.

mp: 144-148 °C; <sup>1</sup>H NMR (400 MHz, CDCl<sub>3</sub>):  $\delta$  7.79 (br. s, 1H), 7.64-7.58 (m, 4H), 7.47 (dt,  $J$  = 5.5 Hz,  $J$  = 8.0 Hz, 1H), 7.39 (t,  $J$  = 8.0 Hz, 2H), 7.28-7.23 (m, 1H), 7.20-7.16 (m, 1H); <sup>19</sup>F NMR (376 MHz, CDCl<sub>3</sub>):  $\delta$  -111.21 (s, 1F); <sup>13</sup>C (100 MHz, CDCl<sub>3</sub>):  $\delta$  164.4, 162.9 (d,  $J_{C-F}$  = 247 Hz), 137.6, 137.3 (d,  $J_{C-F}$  = 7 Hz), 130.5 (d,  $J_{C-F}$  = 8 Hz), 129.2, 124.9, 122.4 (d,  $J_{C-F}$  = 3 Hz), 120.3, 118.9 (d,  $J_{C-F}$  = 21 Hz), 114.6 (d,  $J_{C-F}$  = 23 Hz); IR 3349, 3061, 1654, 1595, 1530, 1503 cm<sup>-1</sup>; HRMS (DualESI-TOFMS)  $m/z$  Calcd. for [C<sub>13</sub>H<sub>11</sub>FNO]<sup>+</sup> 216.0819; found 216.0825.

### 2-Fluoro-*N*-phenylbenzamide<sup>3</sup> **5c**

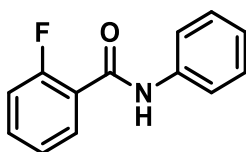

*Method 1:* To a stirred solution of 2-fluorobenzoyl chloride (60  $\mu$ L, 0.5 mmol) in Cyrene (0.5 mL, 1 M) at 0 °C were added triethylamine (77  $\mu$ L, 0.55 mmol) and aniline (46  $\mu$ L, 0.5 mmol). The resultant mixture was allowed to warm to r.t. over 1 h. Water (5 mL) was added and the mixture was stirred for 1 h. The precipitate was filtered and washed with water. The residue was dissolved in EtOAc, dried over sodium sulfate and the solvent was removed under reduced pressure to give 2-fluoro-*N*-phenylbenzamide (**5c**, 79 mg, 73%) as a white solid.

*Method 2:* To a stirred solution of 2-fluorobenzoyl chloride (60  $\mu$ L, 0.5 mmol) in Cyrene (0.5 mL, 1 M) at 0 °C were added triethylamine (77  $\mu$ L, 0.55 mmol) and aniline (46  $\mu$ L, 0.5 mmol). The resultant mixture was allowed to warm to r.t. over 1 h. Water (5 mL) was added and the mixture was stirred for 24 h. The precipitate was filtered and washed with water. The residue was dissolved in EtOAc, dried over sodium sulfate and the solvent was removed under reduced pressure to give 2-fluoro-*N*-phenylbenzamide (**5c**, 75 mg, 70%) as a white solid.

mp. (°C) 94-98;  $^1\text{H}$  NMR ( $\text{CDCl}_3$ , 400 MHz)  $\delta$  8.46 (br. d,  $J = 14.7$ , 1H), 8.19 (td,  $J = 8.0$ ,  $J = 3.9$ , 1H), 7.67 (d,  $J = 7.6\text{Hz}$ , 2H), 7.56-7.50 (m, 1H), 7.40-7.31 (m, 3H), 7.22-7.15 (m, 2H);  $^{19}\text{F}$  NMR ( $\text{CDCl}_3$ , 376 MHz)  $\delta$  -113.16;  $^{13}\text{C}$  NMR ( $\text{CDCl}_3$ , 100 MHz)  $\delta$  161.3 (d,  $J_{\text{C-F}} = 3.5$  Hz), 160.4 (d,  $J_{\text{C-F}} = 245$  Hz), 137.7, 133.7 (d,  $J_{\text{C-F}} = 9.4$  Hz), 132.2 (d,  $J_{\text{C-F}} = 1.8$  Hz), 129.1, 125.1 (d,  $J_{\text{C-F}} = 3.2$  Hz), 124.8, 121.4 (d,  $J_{\text{C-F}} = 11.2$  Hz), 120.6, 116.2 (d,  $J_{\text{C-F}} = 24.9$  Hz); IR (neat): 3376, 3065, 2981, 1657  $\text{cm}^{-1}$ ; HRMS (DualESI-TOFMS)  $m/z$  Calcd. for  $[\text{C}_{13}\text{H}_{11}\text{FNO}]^+$  216.0819; found 216.0825.

#### 4-Bromo-*N*-phenylbenzamide<sup>1</sup> **5d**

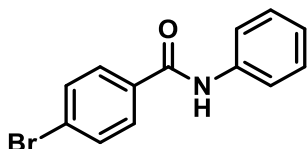

To a stirred solution of 4-bromobenzoyl chloride (110 mg, 0.5 mmol) in Cyrene (0.5 mL, 1 M) at 0 °C were added triethylamine (77  $\mu\text{L}$ , 0.55 mmol) and aniline (46  $\mu\text{L}$ , 0.5 mmol). The resultant mixture was allowed to warm to r.t. over 1 h. Water (5 mL) was added and the mixture was stirred for 1 h. The precipitate was filtered and washed with water. The residue was dissolved in EtOAc, dried over sodium sulfate and the solvent was removed under reduced pressure to give 4-bromo-*N*-phenylbenzamide (**5d**, 118 mg, 85%) as an off white solid.

mp. (°C) 178-181;  $^1\text{H}$  NMR ( $\text{CDCl}_3$ , 400 MHz)  $\delta$  7.75 (d,  $J = 8.4$ , 3H), 7.65-7.62 (m, 4H), 7.39 (t,  $J = 7.9$ , 2H), 7.18 (t,  $J = 7.4$ , 1H);  $^{13}\text{C}$  NMR ( $\text{CDCl}_3$ , 100 MHz)  $\delta$  164.7, 137.6, 133.8, 132.1, 129.2, 128.6, 126.6, 124.8, 120.2; IR (neat): 3347, 3094, 3056, 2916, 1651  $\text{cm}^{-1}$ ; HRMS (DualESI-TOFMS)  $m/z$  Calcd. for  $[\text{C}_{13}\text{H}_{11}\text{BrNO}]^+$  276.0019; found 276.0025.

#### 3,4-Dimethoxy-*N*-phenylbenzamide<sup>4</sup> **5e**

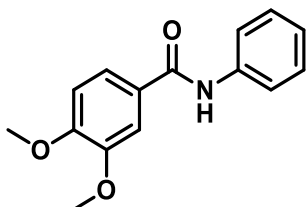

To a stirred solution of 3,4-dimethylbenzoyl chloride (102 mg, 0.5 mmol) in Cyrene (0.5 mL, 1 M) at 0 °C were added triethylamine (78  $\mu\text{L}$ , 0.56 mmol) and aniline (46  $\mu\text{L}$ , 0.5 mmol). The resultant mixture was allowed to warm to r.t. over 1 h. Water (5 mL) was added and the mixture was stirred for 1 h. The precipitate was filtered and washed with water. The residue was dissolved in EtOAc, dried over sodium sulfate and the solvent was removed under reduced pressure to give 3,4-dimethoxy-*N*-phenylbenzamide (**5e**, 108 mg, 83%) as a white solid.

mp. (°C) 171-175;  $^1\text{H}$  NMR ( $\text{CDCl}_3$ , 400 MHz)  $\delta$  7.89 (br. s, 1H), 7.64 (d,  $J = 7.6$  Hz, 2H), 7.49 (d,  $J = 2.0$  Hz, 1H), 7.41-7.34 (m, 3H), 7.14 (t,  $J = 7.4$  Hz, 1H), 6.87 (d,  $J = 8.3$  Hz, 1H), 3.93 (s, 3H), 3.92 (s, 3H);  $^{13}\text{C}$  NMR ( $\text{CDCl}_3$ , 100 MHz)  $\delta$  165.3, 152.1, 149.2, 138.1, 129.1, 127.5, 124.4, 120.2, 119.5, 110.7, 110.3, 56.1, 56.0; IR (neat): 3314, 2941, 2846, 1640  $\text{cm}^{-1}$ ; HRMS (DUALESI-TOFMS)  $m/z$  Calcd. for  $[\text{C}_{15}\text{H}_{15}\text{NO}_3]^+$  258.1125; found 258.1129.

#### *N*-Phenylnicotinamide<sup>5</sup> **5f**

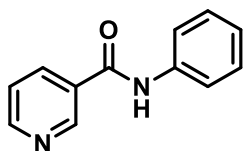

To a stirred solution of pyridine-3-carbonyl chloride hydrochloride (89 mg, 0.5 mmol) in Cyrene (0.5 mL) at 0 °C were added triethylamine (77  $\mu$ L, 0.55 mmol) and aniline (46  $\mu$ L, 0.5 mmol). The resultant mixture was allowed to warm to r.t. over 1 h. Water (5 mL) was added and the mixture was stirred for 24 h. The precipitate was filtered and washed with water. The residue was dissolved in EtOAc, dried over sodium sulfate and the solvent was removed under reduced pressure to afford *N*-phenylnicotinamide (**5f**, 32 mg, 32%) as a white solid.

mp: 118-119°C; <sup>1</sup>H NMR (400 MHz, CDCl<sub>3</sub>):  $\delta$  9.10 (d,  $J$  = 1.8 Hz, 1H), 8.79 (dd,  $J$  = 1.6 Hz,  $J$  = 4.8 Hz, 1H), 8.23-8.20 (m, 1H), 7.85 (br. s, 1H), 7.65 (d,  $J$  = 7.9 Hz, 2H), 7.46 (dd,  $J$  = 4.8 Hz,  $J$  = 7.4 Hz, 1H), 7.40 (t,  $J$  = 7.0 Hz, 2H), 7.20 (t,  $J$  = 7.4 Hz, 1H); <sup>13</sup>C (100 MHz, CDCl<sub>3</sub>):  $\delta$  163.8, 152.7, 147.8, 137.4, 135.3, 130.8, 129.2, 125.1, 123.7, 120.4; IR 3349, 3055, 2919, 2850, 1653, 1601, 1584, 1529 cm<sup>-1</sup>; HRMS (DualESI-TOFMS)  $m/z$  Calcd. for [C<sub>12</sub>H<sub>11</sub>N<sub>2</sub>O]<sup>+</sup> 199.0866; found 199.0871.

#### *N*-Phenyl-2-thiophenecarboxamide<sup>4</sup> **5g**

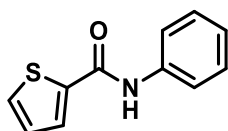

To a stirred solution of 2-thiophenecarbonyl chloride (53  $\mu$ L, 0.5 mmol) in Cyrene (0.5 mL, 1 M) at 0 °C were added triethylamine (77  $\mu$ L, 0.55 mmol) and aniline (46  $\mu$ L, 0.5 mmol). The resultant mixture was allowed to warm to r.t. over 1 h. Water (5 mL) was added and the mixture was stirred for 1 h. The precipitate was filtered and washed with water. The residue was dissolved in EtOAc, dried over sodium sulfate and the solvent was removed under reduced pressure to give *N*-phenyl-2-thiophenecarboxamide (**5g**, 56 mg, 55%) as a white solid.

mp. (°C) 144-148; <sup>1</sup>H NMR (CDCl<sub>3</sub>, 400 MHz)  $\delta$  7.76 (br. s, 1H), 7.64-7.61 (m, 3H), 7.52 (dd,  $J$  = 1.0 Hz,  $J$  = 5.0 Hz, 1H), 7.37 (t,  $J$  = 8.0 Hz, 2H), 7.17-7.12 (m, 2H); <sup>13</sup>C NMR (CDCl<sub>3</sub>, 100 MHz)  $\delta$  160.0, 139.3, 137.6, 130.8, 129.1, 128.5, 127.8, 124.6, 120.3; IR (neat): 3292, 3087, 3032, 2931, 1628 cm<sup>-1</sup>; HRMS (DUALESI-TOFMS)  $m/z$  Calcd. for [C<sub>11</sub>H<sub>10</sub>NOS]<sup>+</sup> 204.0478; found 204.0482.

#### *N*-Phenyl-2-furancarboxamide<sup>6</sup> **5h**

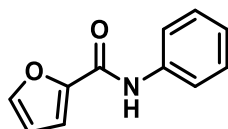

To a stirred solution of 2-furoyl chloride (49  $\mu$ L, 0.5 mmol) in Cyrene (0.5 mL, 1 M) at 0 °C were added triethylamine (77  $\mu$ L, 0.55 mmol) and aniline (46  $\mu$ L, 0.5 mmol). The resultant mixture was allowed to warm to r.t. over 1 h. Water (5 mL) was added and the mixture was stirred for 1 h. The precipitate was filtered and washed with water. The residue was dissolved in EtOAc, dried over

sodium sulfate and the solvent was removed under reduced pressure to give *N*-phenyl-2-furancarboxamide (**5h**, 64 mg, 68%) as an off white solid.

mp. (°C) 120-125; <sup>1</sup>H NMR (CDCl<sub>3</sub>, 400 MHz) δ 8.16 (br. s, 1H), 7.66 (d, *J* = 7.7 Hz, 2H), 7.49 (d, *J* = 0.9 Hz, 1H), 7.36 (t, *J* = 7.9 Hz, 2H), 7.23 (d, *J* = 3.4 Hz, 1H), 7.14 (t, *J* = 7.4 Hz, 1H), 6.54 (dd, *J* = 1.7 Hz, *J* = 3.5 Hz, 1H); <sup>13</sup>C NMR (CDCl<sub>3</sub>, 100 MHz) δ 156.1, 147.8, 144.2, 137.4, 129.1, 124.5, 120.0, 115.3, 112.6; IR (neat): 3292, 3129, 3057, 2980, 1654 cm<sup>-1</sup>; HRMS (DualESI-TOFMS) *m/z* Calcd. for [C<sub>11</sub>H<sub>10</sub>NO<sub>2</sub>]<sup>+</sup> 188.0706; found 188.0714.

### 3-Chloro-*N*-phenylbenzo[b]thiophene-2-carboxamide<sup>7</sup> **5i**

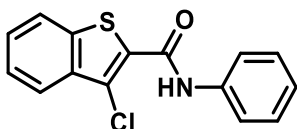

To a stirred solution of 3-chlorobenzothiophene-2-carbonyl chloride (118 mg, 0.5 mmol) in Cyrene (0.5 mL, 1 M) at 0 °C were added triethylamine (71 μL, 0.56 mmol) and aniline (46 μL, 0.5 mmol). The resultant mixture was allowed to warm to r.t. over 1 h. Water (5 mL) was added and the mixture was stirred for 1 h. The precipitate was filtered and washed with water. The residue was dissolved in EtOAc, dried over sodium sulfate and the solvent was removed under reduced pressure to give 3-chloro-*N*-phenylbenzo[b]thiophene-2-carboxamide (**5i**, 66 mg, 45%) as a white solid.

mp. (°C) 178-182; <sup>1</sup>H NMR (CDCl<sub>3</sub>, 400 MHz) δ 8.96 (br. s, 1H), 7.96-7.89 (m, 2H), 7.72 (d, *J* = 7.6 Hz, 2H), 7.58-7.53 (m, 2H), 7.43 (d, *J* = 2.0 Hz, 2H), 7.22 (t, *J* = 7.4 Hz, 1H); <sup>13</sup>C NMR (CDCl<sub>3</sub>, 100 MHz) δ 158.7, 138.2, 137.2, 137.0, 129.2, 127.7, 125.6, 125.1, 123.3, 122.9, 120.4, 118.5; IR (neat): 3323, 3053, 1642 cm<sup>-1</sup>; HRMS (DualESI-TOFMS) *m/z* Calcd. for [C<sub>15</sub>H<sub>11</sub>ClNOS]<sup>+</sup> 288.0244; found 288.0245.

### *N*-Phenylcyclopropanecarboxamide<sup>5</sup> **5j**

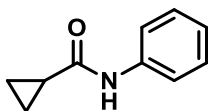

**Method 1:** To a stirred solution of cyclopropanecarbonyl chloride (45 μL, 0.5 mmol) in Cyrene (0.5 mL, 1 M) at 0 °C were added triethylamine (77 μL, 0.55 mmol) and aniline (46 μL, 0.5 mmol). The resultant mixture was allowed to warm to r.t. over 1 h. Water (5 mL) was added and the mixture was stirred for 1 h. The precipitate was filtered and washed with water. The residue was dissolved in EtOAc, dried over sodium sulfate and the solvent was removed under reduced pressure to give *N*-phenylcyclopropanecarboxamide (**5j**, 37 mg, 46%) as a white solid.

**Method 2:** To a stirred solution of cyclopropanecarbonyl chloride (45 μL, 0.5 mmol) in Cyrene (0.5 mL, 1 M) at 0 °C were added triethylamine (77 μL, 0.55 mmol) and aniline (46 μL, 0.5 mmol). The resultant mixture was allowed to warm to r.t. over 1 h. Water (5 mL) was added and the mixture was stirred for 24 h. The precipitate was filtered and washed with water. The residue was dissolved in EtOAc, dried over sodium sulfate and the solvent was removed under reduced pressure to give *N*-phenylcyclopropanecarboxamide (**5j**, 39 mg, 49%) as a white solid.

mp. (°C) 110-114; <sup>1</sup>H NMR (CDCl<sub>3</sub>, 400 MHz) δ 7.77 (br. s, 1H), 7.51 (d, *J* = 7.8 Hz, 2H), 7.28 (t, *J* = 7.8 Hz, 2H), 7.08 (t, *J* = 7.2 Hz, 2H), 1.55-1.50 (m, 1H), 1.09-1.05 (m, 2H), 0.84-0.79 (m, 2H); <sup>13</sup>C NMR (CDCl<sub>3</sub>, 100 MHz) δ 172.2, 138.2, 129.0, 124.0, 119.8, 15.7, 7.9; IR (neat): 3284, 3253, 3131, 2980, 1656 cm<sup>-1</sup>; HRMS (DualESI-TOFMS) *m/z* Calcd. for [C<sub>10</sub>H<sub>12</sub>NO]<sup>+</sup> 162.0913; found 162.0916.

*N*-Phenylcyclobutanecarboxamide **5k**

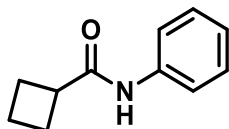

To a stirred solution of cyclobutanecarbonyl chloride (57 μL, 0.5 mmol) in Cyrene (0.5 mL, 1 M) at 0 °C were added triethylamine (77 μL, 0.55 mmol) and aniline (46 μL, 0.5 mmol). The resultant mixture was allowed to warm to r.t. over 1 h. Water (5 mL) was added and the mixture was stirred for 1 h. The precipitate was filtered and washed with water. The residue was dissolved in EtOAc, dried over sodium sulfate and the solvent was removed under reduced pressure to give *N*-phenylcyclobutanecarboxamide (**5k**, 67 mg, 76%) as an off white solid.

mp. (°C) 109-113; <sup>1</sup>H NMR (CDCl<sub>3</sub>, 400 MHz) δ 7.53 (d, *J* = 7.9 Hz, 2H), 7.31 (t, *J* = 7.9 Hz, 2H), 7.16 (br. s, 1H), 7.09 (t, *J* = 5.4 Hz, 1H), 3.16 (quin, *J* = 8.5 Hz, 1H), 2.45-2.35 (m, 2H), 2.26-2.18 (m, 2H), 2.06-1.87 (m, 2H); <sup>13</sup>C NMR (CDCl<sub>3</sub>, 100 MHz) δ 179.2, 138.0, 129.0, 124.1, 119.7, 40.9, 25.3, 18.1; IR (neat): 3294, 3137, 2982, 2942, 2865, 1657 cm<sup>-1</sup>; HRMS (DualESI-TOFMS) *m/z* Calcd. for [C<sub>11</sub>H<sub>14</sub>NO]<sup>+</sup> 176.1070; found 176.1074.

*N*-Benzyl-4-fluorobenzamide<sup>8</sup> **6a**

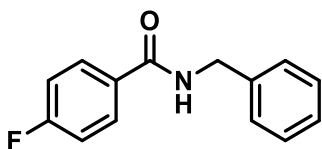

To a stirred solution of 4-fluorobenzoyl chloride (59 μL, 0.5 mmol) in Cyrene (0.5 mL, 1 M) at 0 °C were added triethylamine (77 μL, 0.55 mmol) and benzylamine (55 μL, 0.5 mmol). The resultant mixture was allowed to warm to r.t. over 1 h. Water (5 mL) was added and the mixture was stirred for 1 h. The precipitate was filtered and washed with water. The residue was dissolved in EtOAc, dried over sodium sulfate and the solvent was removed under reduced pressure to give *N*-benzyl-4-fluorobenzamide (**6a**, 93 mg, 81%) as a white solid.

mp. (°C) 140-145; <sup>1</sup>H NMR (CDCl<sub>3</sub>, 400 MHz) δ 7.82-7.78 (m, 2H), 7.38-7.28 (m, 5H), 7.12-7.07 (m, 2H), 6.44 (br. s, 1H) 4.63 (d, *J* = 5.6 Hz, 2H); <sup>19</sup>F NMR (CDCl<sub>3</sub>, 376 MHz) δ -108.08; <sup>13</sup>C NMR (CDCl<sub>3</sub>, 100 MHz) δ 166.3, 164.8 (d, *J*<sub>C-F</sub> = 250.4 Hz), 138.0, 130.5 (d, *J*<sub>C-F</sub> = 3.1 Hz), 129.3 (d, *J*<sub>C-F</sub> = 8.9 Hz), 128.8, 128.0, 127.7, 115.6 (d, *J*<sub>C-F</sub> = 21.7 Hz), 44.2; IR (neat): 3317, 3066, 3032, 2931, 1640 cm<sup>-1</sup>; HRMS (DualESI-TOFMS) *m/z* Calcd. for [C<sub>14</sub>H<sub>13</sub>FNO]<sup>+</sup> 230.0976; found 230.0976.



*N*-Benzyl-3-fluorobenzamide<sup>9</sup> **6b**

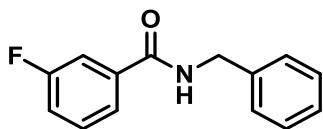

To a stirred solution of 3-fluorobenzoylchloride (61  $\mu$ L, 0.5 mmol) in Cyrene (0.5 mL, 1 M) at 0 °C were added triethylamine (77  $\mu$ L, 0.55 mmol) and benzylamine (55  $\mu$ L, 0.5 mmol). The resultant mixture was allowed to warm to r.t. over 1 h. Water (5 mL) was added and the mixture was stirred for 24 h. The precipitate was filtered and washed with water. The residue was dissolved in EtOAc, dried over sodium sulfate and the solvent was removed under reduced pressure to give *N*-benzyl-3-fluorobenzamide (**6b**, 78 mg, 73%) as an off white solid.

mp. (°C) 90-93; <sup>1</sup>H NMR (CDCl<sub>3</sub>, 400 MHz)  $\delta$  7.54-7.49 (m, 2H), 7.54-7.49 (m, 2H), 7.38-7.26 (m, 6H), 7.20-7.15 (m, 1H), 6.85 (br. s, 1H), 4.58 (d,  $J$  = 5.7, 2H); <sup>19</sup>F NMR (CDCl<sub>3</sub>, 376 MHz)  $\delta$  -111.79; <sup>13</sup>C NMR (CDCl<sub>3</sub>, 100 MHz)  $\delta$  166.2 (d,  $J_{C-F}$  = 2.4 Hz), 162.7 (d,  $J_{C-F}$  = 246.1 Hz), 138.0, 136.6 (d,  $J_{C-F}$  = 6.8 Hz), 130.2 (d,  $J_{C-F}$  = 7.8 Hz), 128.8, 127.9, 127.7, 122.5 (d,  $J_{C-F}$  = 3.0 Hz), 118.5 (d,  $J_{C-F}$  = 21.1 Hz), 114.5 (d,  $J_{C-F}$  = 22.7 Hz), 44.2; IR (neat): 3295, 3070, 3034, 2933, 1634 cm<sup>-1</sup>; HRMS (DualESI-TOFMS)  $m/z$  Calcd. for [C<sub>14</sub>H<sub>13</sub>FNO]<sup>+</sup> 230.0976; found 230.0979.

2-Fluoro-*N*-(phenylmethyl)benzamide<sup>9</sup> **6c**

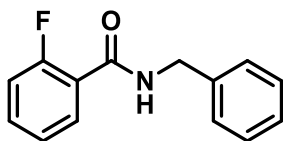

To a stirred solution of 2-fluorobenzoyl chloride (60  $\mu$ L, 0.5 mmol) in Cyrene (0.5 mL, 1 M) at 0 °C were added triethylamine (77  $\mu$ L, 0.55 mmol) and benzyl amine (55  $\mu$ L, 0.5 mmol). The resultant mixture was allowed to warm to r.t. over 1 h. Water (5 mL) was added and the mixture was stirred for 1 h. The precipitate was filtered and washed with water. The residue was dissolved in EtOAc, dried over sodium sulfate and the solvent was removed under reduced pressure to give 2-fluoro-*N*-(phenylmethyl)benzamide (**6c**, 89 mg, 76%) as a white solid.

mp. (°C) 39-40; <sup>1</sup>H NMR (CDCl<sub>3</sub>, 400 MHz)  $\delta$  8.09 (td,  $J$  = 1.8,  $J$  = 7.9, 1H), 7.47-7.06 (m, 9H), 4.66 (d,  $J$  = 5.7, 2H); <sup>19</sup>F NMR (CDCl<sub>3</sub>, 376 MHz)  $\delta$  -113.42; <sup>13</sup>C NMR (CDCl<sub>3</sub>, 100 MHz)  $\delta$  163.3 (d,  $J_{C-F}$  = 3.1 Hz), 160.4 (d,  $J_{C-F}$  = 245.7 Hz), 138.0, 133.4 (d,  $J_{C-F}$  = 9.3 Hz), 132.2 (d,  $J_{C-F}$  = 2.1 Hz), 128.8, 127.7, 127.6, 124.9 (d,  $J_{C-F}$  = 3.2 Hz), 121.0 (d,  $J_{C-F}$  = 11.4 Hz), 116.0 (d,  $J_{C-F}$  = 24.6 Hz), 44.1; IR (neat): 3306, 3085, 29279, 1644 cm<sup>-1</sup>; HRMS (DualESI-TOFMS)  $m/z$  Calcd. for [C<sub>14</sub>H<sub>13</sub>FNO]<sup>+</sup> 230.0976; found 229.0980.

*N*-(4-bromobenzoyl)benzylamine<sup>10</sup> **6d**

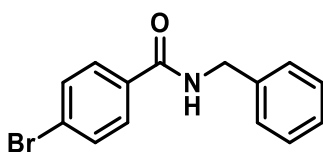

To a stirred solution of 4-bromobenzoyl chloride (101.5 mg, 0.5 mmol) in Cyrene (0.5 mL, 1 M) at 0 °C were added triethylamine (71  $\mu$ L, 0.51 mmol) and aniline (50  $\mu$ L, 0.5 mmol). The resultant mixture was allowed to warm to r.t. over 1 h. Water (5 mL) was added and the mixture was stirred for 1 h. The precipitate was filtered and washed with water. The residue was dissolved in EtOAc, dried over sodium sulfate and the solvent was removed under reduced pressure to give *N*-(4-bromobenzoyl)benzylamine (**6d**, 69 mg, 69%) as an off white solid.

mp. (°C) 165-169;  $^1\text{H}$  NMR ( $\text{CDCl}_3$ , 400 MHz)  $\delta$  7.67-7.65 (m, 2H), 7.56-7.55 (m, 2H), 7.38-7.29 (m, 5H), 6.42 (br. s, 4.63 (d,  $J$  = 5.6, 2H);  $^{13}\text{C}$  NMR ( $\text{CDCl}_3$ , 100 MHz)  $\delta$  166.4, 137.9, 133.2, 131.8, 128.9, 128.6, 128.0, 127.8, 126.3, 44.3; IR (neat): 3305, 3060, 3029, 1639  $\text{cm}^{-1}$ ; HRMS (DualESI-TOFMS)  $m/z$  Calcd. for  $[\text{C}_{14}\text{H}_{12}\text{BrNONa}]^+$  311.9994; found 311.9989.

*N*-benzyl-3,4-dimethoxybenzamide<sup>11</sup> **6e**

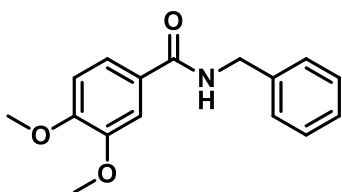

*Method 1:* To a stirred solution of 3,4-dimethoxybenzoyl chloride (100 mg, 0.5 mmol) in Cyrene (0.5 mL) at 0 °C were added triethylamine (77  $\mu$ L, 0.55 mmol) and benzylamine (54  $\mu$ L, 0.5 mmol). The resultant mixture was allowed to warm to r.t. over 1 h. Water (5 mL) was added and the mixture was stirred for 1 h. The precipitate was filtered and washed with water. The residue was dissolved in EtOAc, dried over sodium sulfate and the solvent was removed under reduced pressure to afford *N*-benzyl-3,4-dimethoxybenzamide (**6e**, 101 mg, 86%) as a white solid.

*Method 2:* To a stirred solution of 3,4-dimethoxybenzoyl chloride (1 g, 5 mmol) in Cyrene (5 mL) at 0 °C were added triethylamine (767  $\mu$ L, 5.5 mmol) and benzylamine (546  $\mu$ L, 5 mmol). The resultant mixture was allowed to warm to r.t. over 1 h. Water (5 mL) was added and the mixture was stirred for 24 h. The precipitate was filtered and washed with water. The residue was dissolved in EtOAc, dried over sodium sulfate and the solvent was removed under reduced pressure to afford *N*-benzyl-3,4-dimethoxybenzamide (**6e**, 1.04 g, 77%) as a white solid.

mp: 124-128 °C;  $^1\text{H}$  NMR (400 MHz,  $\text{CDCl}_3$ ):  $\delta$  7.43 (d,  $J$  = 1.9 Hz, 1H), 7.34 (dd,  $J$  = 1.9 Hz,  $J$  = 7.3 Hz, 1H), 7.28-7.22\* (m, 5H), 7.06 (t,  $J$  = 5.5 Hz, 1H), 6.75 (d,  $J$  = 8.4 Hz, 1H), 4.5 (d,  $J$  = 5.8 Hz, 2H), 3.84 (s, 3H), 3.79 (s, 3H);  $^{13}\text{C}$  (100 MHz,  $\text{CDCl}_3$ ):  $\delta$  167.1, 151.7, 148.8, 138.6, 128.6, 127.8, 127.4, 126.9, 119.7, 110.6, 110.2, 55.9, 55.9, 44.0; IR 3276, 3085, 3013, 2933, 2838, 1627, 1581, 1505  $\text{cm}^{-1}$ ; HRMS (DualESI-TOFMS)  $m/z$  Calcd. for  $[\text{C}_{16}\text{H}_{18}\text{NO}_3]^+$  272.1281; found 272.1276.

*N*-Benzylthiophene-2-carboxamide<sup>8</sup> **6g**

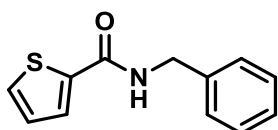

To a stirred solution of 2-thiophenecarbonyl chloride (53  $\mu$ L, 0.5 mmol) in Cyrene (0.5 mL, 1 M) at 0 °C were added triethylamine (77  $\mu$ L, 0.55 mmol) and benzylamine (55  $\mu$ L, 0.5 mmol). The resultant mixture was allowed to warm to r.t. over 1 h. Water (5 mL) was added and the mixture was stirred

for 1 h. The precipitate was filtered and washed with water. The residue was dissolved in EtOAc, dried over sodium sulfate and the solvent was removed under reduced pressure to give *N*-benzylthiophene-2-carboxamide (**6g**, 80 mg, 74%) as an off white solid.

mp. (°C) 117-121; <sup>1</sup>H NMR (CDCl<sub>3</sub>, 400 MHz) δ 7.51 (dd, *J* = 1.1 Hz, *J* = 3.7 Hz, 1H), 7.47 (dd, *J* = 1.1 Hz, *J* = 5.0 Hz, 1H), 7.35-7.28 (m, 5H), 7.06 (dd, *J* = 3.7 Hz, *J* = 5.0 Hz, 1H), 6.39 (br. s, 1H), 4.61 (d, *J* = 5.8, 2H); <sup>13</sup>C NMR (CDCl<sub>3</sub>, 100 MHz) δ 161.8, 138.8, 138.0, 130.1, 128.8, 128.2, 128.0, 127.68, 127.67, 44.0; IR (neat): 3348, 3089, 3060, 3032, 1621 cm<sup>-1</sup>; HRMS (DualESI-TOFMS) *m/z* Calcd. for [C<sub>12</sub>H<sub>12</sub>NOS]<sup>+</sup> 218.0634; found 218.0640.

*N*-(phenylmethyl)-2-furancarboxamide<sup>12</sup> **6h**

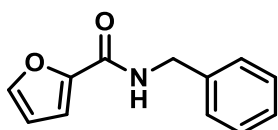

To a stirred solution of furoyl chloride (49 μL, 0.5 mmol) in Cyrene (0.5 mL, 1 M) at 0 °C were added triethylamine (77 μL, 0.55 mmol) and benzylamine (55 μL, 0.5 mmol). The resultant mixture was allowed to warm to r.t. over 1 h. Water (5 mL) was added and the mixture was stirred for 1 h. The precipitate was filtered and washed with water. The residue was dissolved in EtOAc, dried over sodium sulfate and the solvent was removed under reduced pressure to give *N*-(phenylmethyl)-2-furancarboxamide (**6h**, 74 mg, 73%) as an off white solid.

mp. (°C) 109-110; <sup>1</sup>H NMR (CDCl<sub>3</sub>, 400 MHz) δ 7.40-7.39 (m, 1H), 7.35-7.26 (m, 5H), 7.13-7.12 (m, 1H), 6.76 (br. s, 1H), 6.40 (dd, *J* = 1.7 Hz, *J* = 3.5 Hz, 1H), 4.59 (d, *J* = 6.0 Hz, 2H); <sup>13</sup>C NMR (CDCl<sub>3</sub>, 100 MHz) δ 158.3, 147.9, 144.0, 138.1, 128.8, 127.9, 127.6, 114.4, 112.2, 43.1; IR (neat): 3283, 3124, 3062, 3030, 1638 cm<sup>-1</sup>; HRMS (DualESI-TOFMS) *m/z* Calcd. for [C<sub>12</sub>H<sub>12</sub>NO<sub>2</sub>]<sup>+</sup> 202.0863; found 202.866.

3-Chloro-*N*-(phenylmethyl)benzo[*b*]thiophene-2-carboxamide **6i**

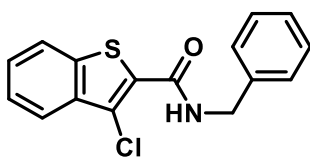

*Method 1:* To a stirred solution of 3-chlorobenzothiophene-2-carbonyl chloride (118 mg, 0.5 mmol) in Cyrene (0.5 mL, 1 M) at 0 °C were added triethylamine (79 μL, 0.56 mmol) and benzylamine (56 μL, 0.5 mmol). The resultant mixture was allowed to warm to r.t. over 1 h. Water (5 mL) was added and the mixture was stirred for 1 h. The precipitate was filtered and washed with water. The residue was dissolved in EtOAc, dried over sodium sulfate and the solvent was removed under reduced pressure to give 3-chloro-*N*-(phenylmethyl)benzo[*b*]thiophene-2-carboxamide (**6i**, 73 mg, 47%) as an off white solid.

*Method 2:* To a stirred solution of 3-chlorobenzothiophene-2-carbonyl chloride (118 mg, 0.5 mmol) in Cyrene (0.5 mL, 1 M) at 0 °C were added triethylamine (79 μL, 0.56 mmol) and benzylamine (56 μL, 0.5 mmol). The resultant mixture was allowed to warm to r.t. over 1 h. Water (5 mL) was added and the mixture was stirred for 24 h. The precipitate was filtered and washed with water. The residue was dissolved in EtOAc, dried over sodium sulfate and the solvent was removed under reduced

pressure to give 3-chloro-*N*-(phenylmethyl)benzo[*b*]thiophene-2-carboxamide (**6i**, 106 mg, 74%) as an off white solid.

mp. (°C) 122-126; <sup>1</sup>H NMR (CDCl<sub>3</sub>, 400 MHz) δ 7.88-7.84 (m, 2H), 7.53-7.31 (m, 8H), 4.74 (d, *J* = 5.7 Hz, 2H); <sup>13</sup>C NMR (CDCl<sub>3</sub>, 125 MHz) δ 160.8, 138.0, 137.6, 137.0, 133.1, 128.9, 127.8, 127.4, 125.4, 123.1, 122.9, 118.7, 44.2; IR (neat): 3259, 3057, 1626 cm<sup>-1</sup>; HRMS (DualESI-TOFMS) *m/z* Calcd. for [C<sub>16</sub>H<sub>12</sub>ClNOSNa]<sup>+</sup> 324.0220; found 324.0218.

*N*-Benzylcyclopropanecarboxamide<sup>10</sup> **6j**

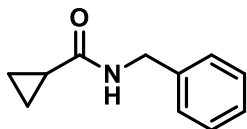

To a stirred solution of cyclopropanecarbonyl chloride (45 μL, 0.5 mmol) in Cyrene (0.5 mL) at 0 °C were added triethylamine (77 μL, 0.55 mmol) and benzylamine (54 μL, 0.5 mmol). The resultant mixture was allowed to warm to r.t. over 1 h. Water (5 mL) was added and the mixture was stirred for 1 h. The precipitate was filtered and washed with water. The residue was dissolved in EtOAc, dried over sodium sulfate and the solvent was removed under reduced pressure to afford *N*-benzylcyclopropanecarboxamide (**6j**, 56 mg, 64%) as a white solid.

mp: 139-141°C; <sup>1</sup>H NMR (400 MHz, CDCl<sub>3</sub>): δ 7.31-7.26\* (m, 5H), 5.85 (br. s, 1H), 4.47 (d, *J* = 5.7 Hz, 2H), 1.38-1.32 (m, 1H), 1.04-1.00 (m, 2H), 0.78-0.74 (m, 2H); <sup>13</sup>C (100 MHz, CDCl<sub>3</sub>): δ 170.8, 138.5, 128.7, 127.9, 127.5, 43.9, 14.8, 7.3; IR 3291, 1630, 1560, 1452, 1110 cm<sup>-1</sup>; HRMS (DualESI-TOFMS) *m/z* Calcd. for [C<sub>11</sub>H<sub>14</sub>NO]<sup>+</sup> 176.1070; found 176.1073.

\*Overlaps with residual CHCl<sub>3</sub>

*N*-Benzylcyclobutanecarboxamide<sup>13</sup> **6k**

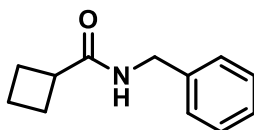

To a stirred solution of cyclobutanecarbonyl chloride (57 μL, 0.5 mmol) in Cyrene (0.5 mL) at 0 °C were added triethylamine (77 μL, 0.55 mmol) and benzylamine (54 μL, 0.5 mmol). The resultant mixture was allowed to warm to r.t. over 1 h. Water (5 mL) was added and the mixture was stirred for 1 h. The precipitate was filtered and washed with water. The residue was dissolved in EtOAc, dried over sodium sulfate and the solvent was removed under reduced pressure to afford *N*-benzylcyclobutanecarboxamide (**6k**, 40 mg, 42%) as a white solid.

<sup>1</sup>H NMR (400 MHz, CDCl<sub>3</sub>): δ 7.36-7.26\* (m, 5H), 5.59 (br. s, 1H), 3.03 (quin, *J* = 8.5 Hz, 1H), 2.37-2.27 (m, 2H), 2.20-2.12 (m, 2H), 2.03-1.83 (m, 2H); <sup>13</sup>C (100 MHz, CDCl<sub>3</sub>): δ 174.8, 138.5, 128.7, 127.8, 127.5, 43.5, 39.9, 28.4, 18.2; IR 3290, 2930, 1631, 1520, 1450 cm<sup>-1</sup>; HRMS (DualESI-TOFMS) *m/z* Calcd. for [C<sub>12</sub>H<sub>15</sub>NOK]<sup>+</sup> 228.0785; found 228.0787.

## References

1. F. Xiao, Y. Liu, C. Tang and G. J. Deng, *Org Lett*, 2012, **14**, 984-987.
2. Y.-C. Teo, F.-F. Yong, I. K. Ithnin, S.-H. T. Yio and Z. Lin, *European Journal of Organic Chemistry*, 2013, **2013**, 515-524.
3. C. R. Shugrue, J. R. DeFrancisco, A. J. Metrano, B. D. Brink, R. S. Nomoto and B. R. Linton, *Org Biomol Chem*, 2016, **14**, 2223-2227.
4. B. V. Varun, A. Sood and K. R. Prabhu, *RSC Adv.*, 2014, **4**, 60798-60807.
5. F. Ma, X. Xie, L. Zhang, Z. Peng, L. Ding, L. Fu and Z. Zhang, *J Org Chem*, 2012, **77**, 5279-5285.
6. L. Zhang, W. Wang, A. Wang, Y. Cui, X. Yang, Y. Huang, X. Liu, W. Liu, J.-Y. Son, H. Oji and T. Zhang, *Green Chemistry*, 2013, **15**.
7. M. Pieroni, E. Azzali, N. Basilico, S. Parapini, M. Zolkiewski, C. Beato, G. Annunziato, A. Bruno, F. Vacondio and G. Costantino, *J Med Chem*, 2017, **60**, 1959-1970.
8. Q. Xu, H. Xie, E.-L. Zhang, X. Ma, J. Chen, X.-C. Yu and H. Li, *Green Chemistry*, 2016, **18**, 3940-3944.
9. C. Chen and S. H. Hong, *Org Lett*, 2012, **14**, 2992-2995.
10. Y. Li, H. Chen, J. Liu, X. Wan and Q. Xu, *Green Chemistry*, 2016, **18**, 4865-4870.
11. B. Narasimhan, S. Ohlan, R. Ohlan, V. Judge and R. Narang, *Eur J Med Chem*, 2009, **44**, 689-700.
12. R. A. Green, D. Pletcher, S. G. Leach and R. C. Brown, *Org Lett*, 2016, **18**, 1198-1201.
13. D. Lafrance, P. Bowles, K. Leeman and R. Rafka, *Org Lett*, 2011, **13**, 2322-2325.
14. D. Leow, *Org Lett*, 2014, **16**, 5812-5815.
15. X. Wu, W. Fan, Y. Pan, Y. Zhai, Y. Niu, C. Li and Q. Mei, *Molecules*, 2014, **19**, 1034-1046.
16. V. Kumar and S. J. Connon, *Chem Commun (Camb)*, 2017, **53**, 10212-10215.
17. Q. S. Liu, D. Y. Wang, Z. J. Yang, Y. X. Luan, J. F. Yang, J. F. Li, Y. G. Pu and M. Ye, *J Am Chem Soc*, 2017, **139**, 18150-18153.

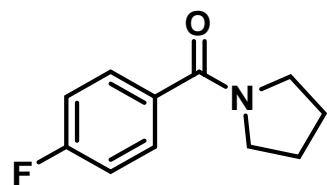

4a

— 168.6431  
— 164.6438  
— 162.1632

— 133.2492  
— 133.2155  
— 129.4564  
— 129.3715

— 115.3218  
— 115.1061

— 77.4603  
— 77.1417  
— 76.8233

— 49.6787  
— 46.2976

— 26.4128  
— 24.4012

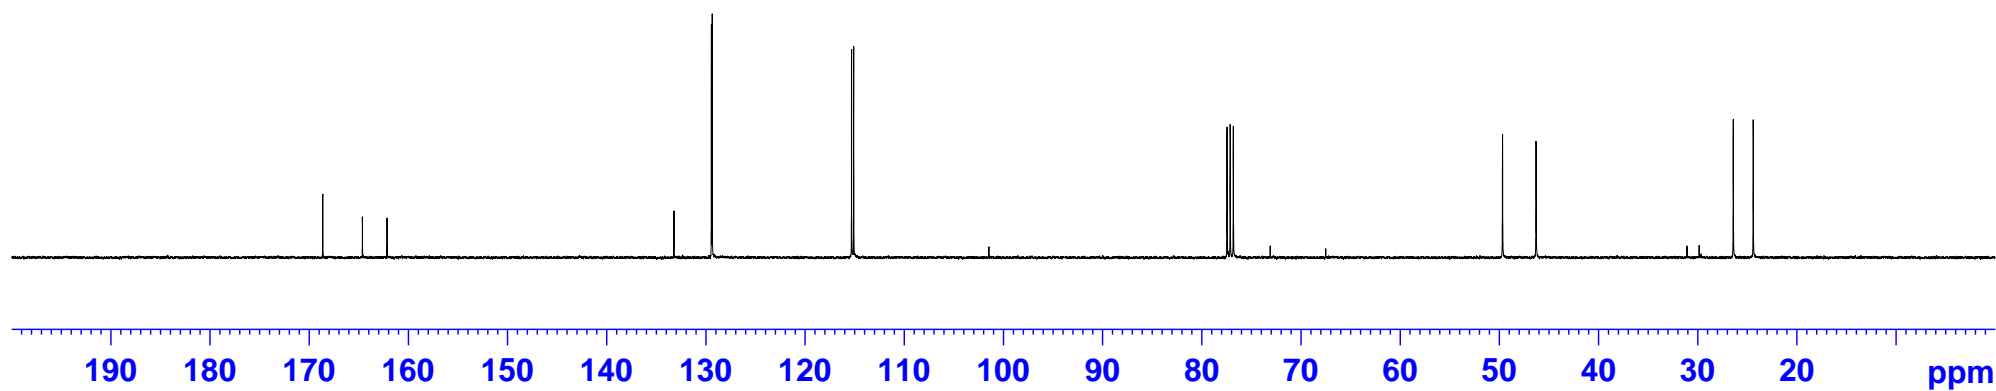

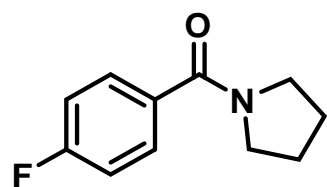

4a

-110.41

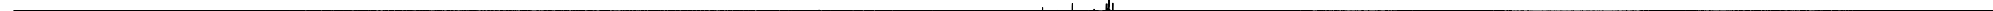

-20

-40

-60

-80

-100

-120

-140

-160

-180

ppm

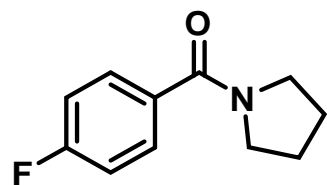

4a

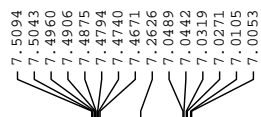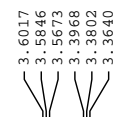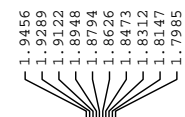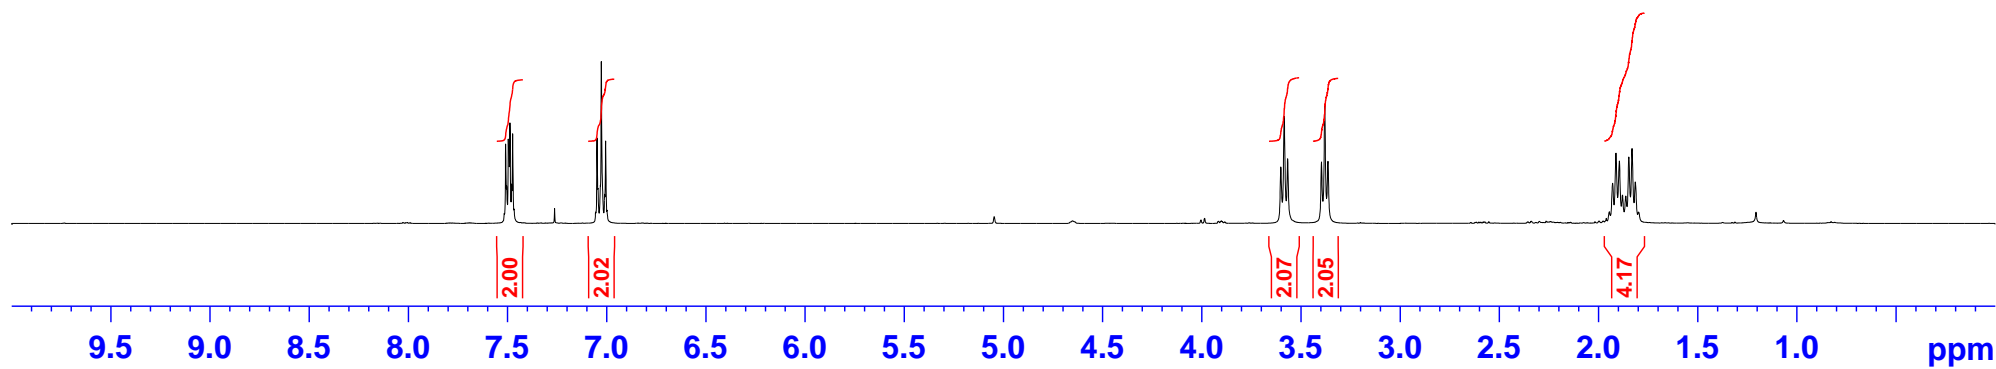



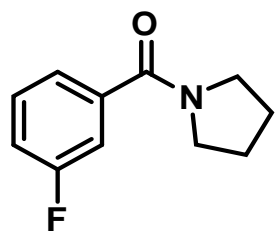

4b

168.1770  
168.1539  
163.5948  
161.1360

139.2648  
139.1966

130.0716  
129.9923

122.7821  
122.7506

116.8484  
116.6387  
114.4398  
114.2145

77.4473  
77.1290  
76.8107

49.5232  
46.2362

26.3500  
24.3844

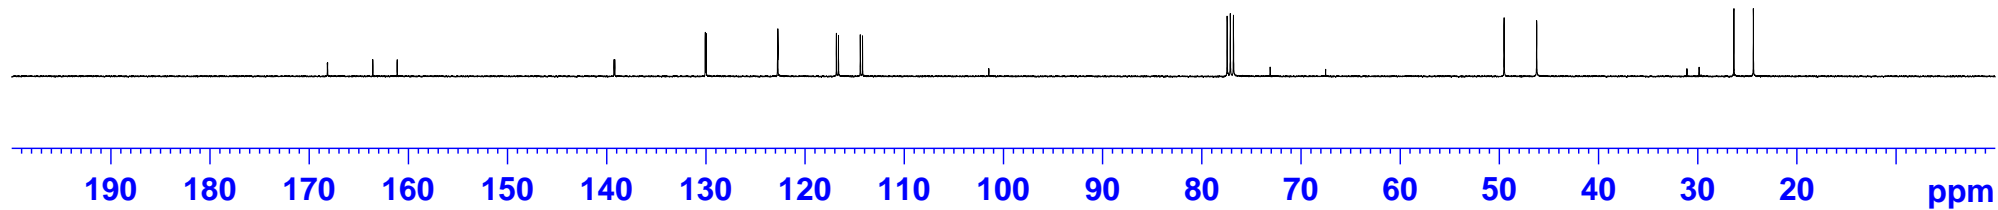

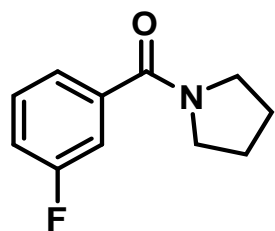

4b

— -112.30

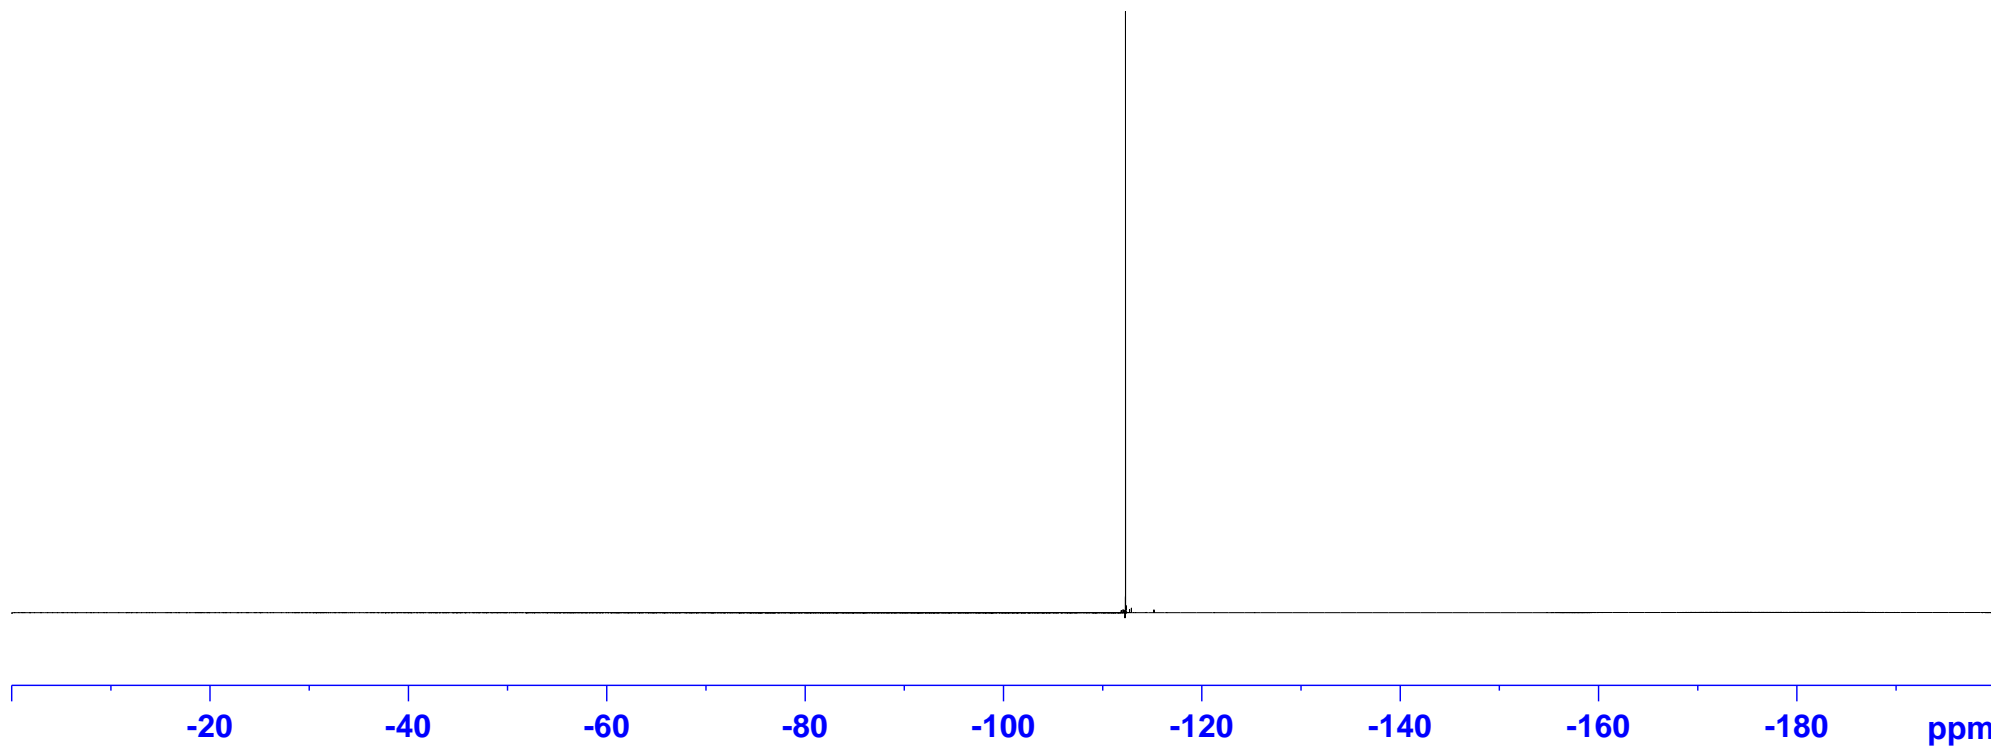

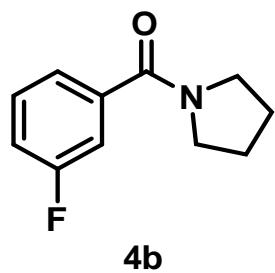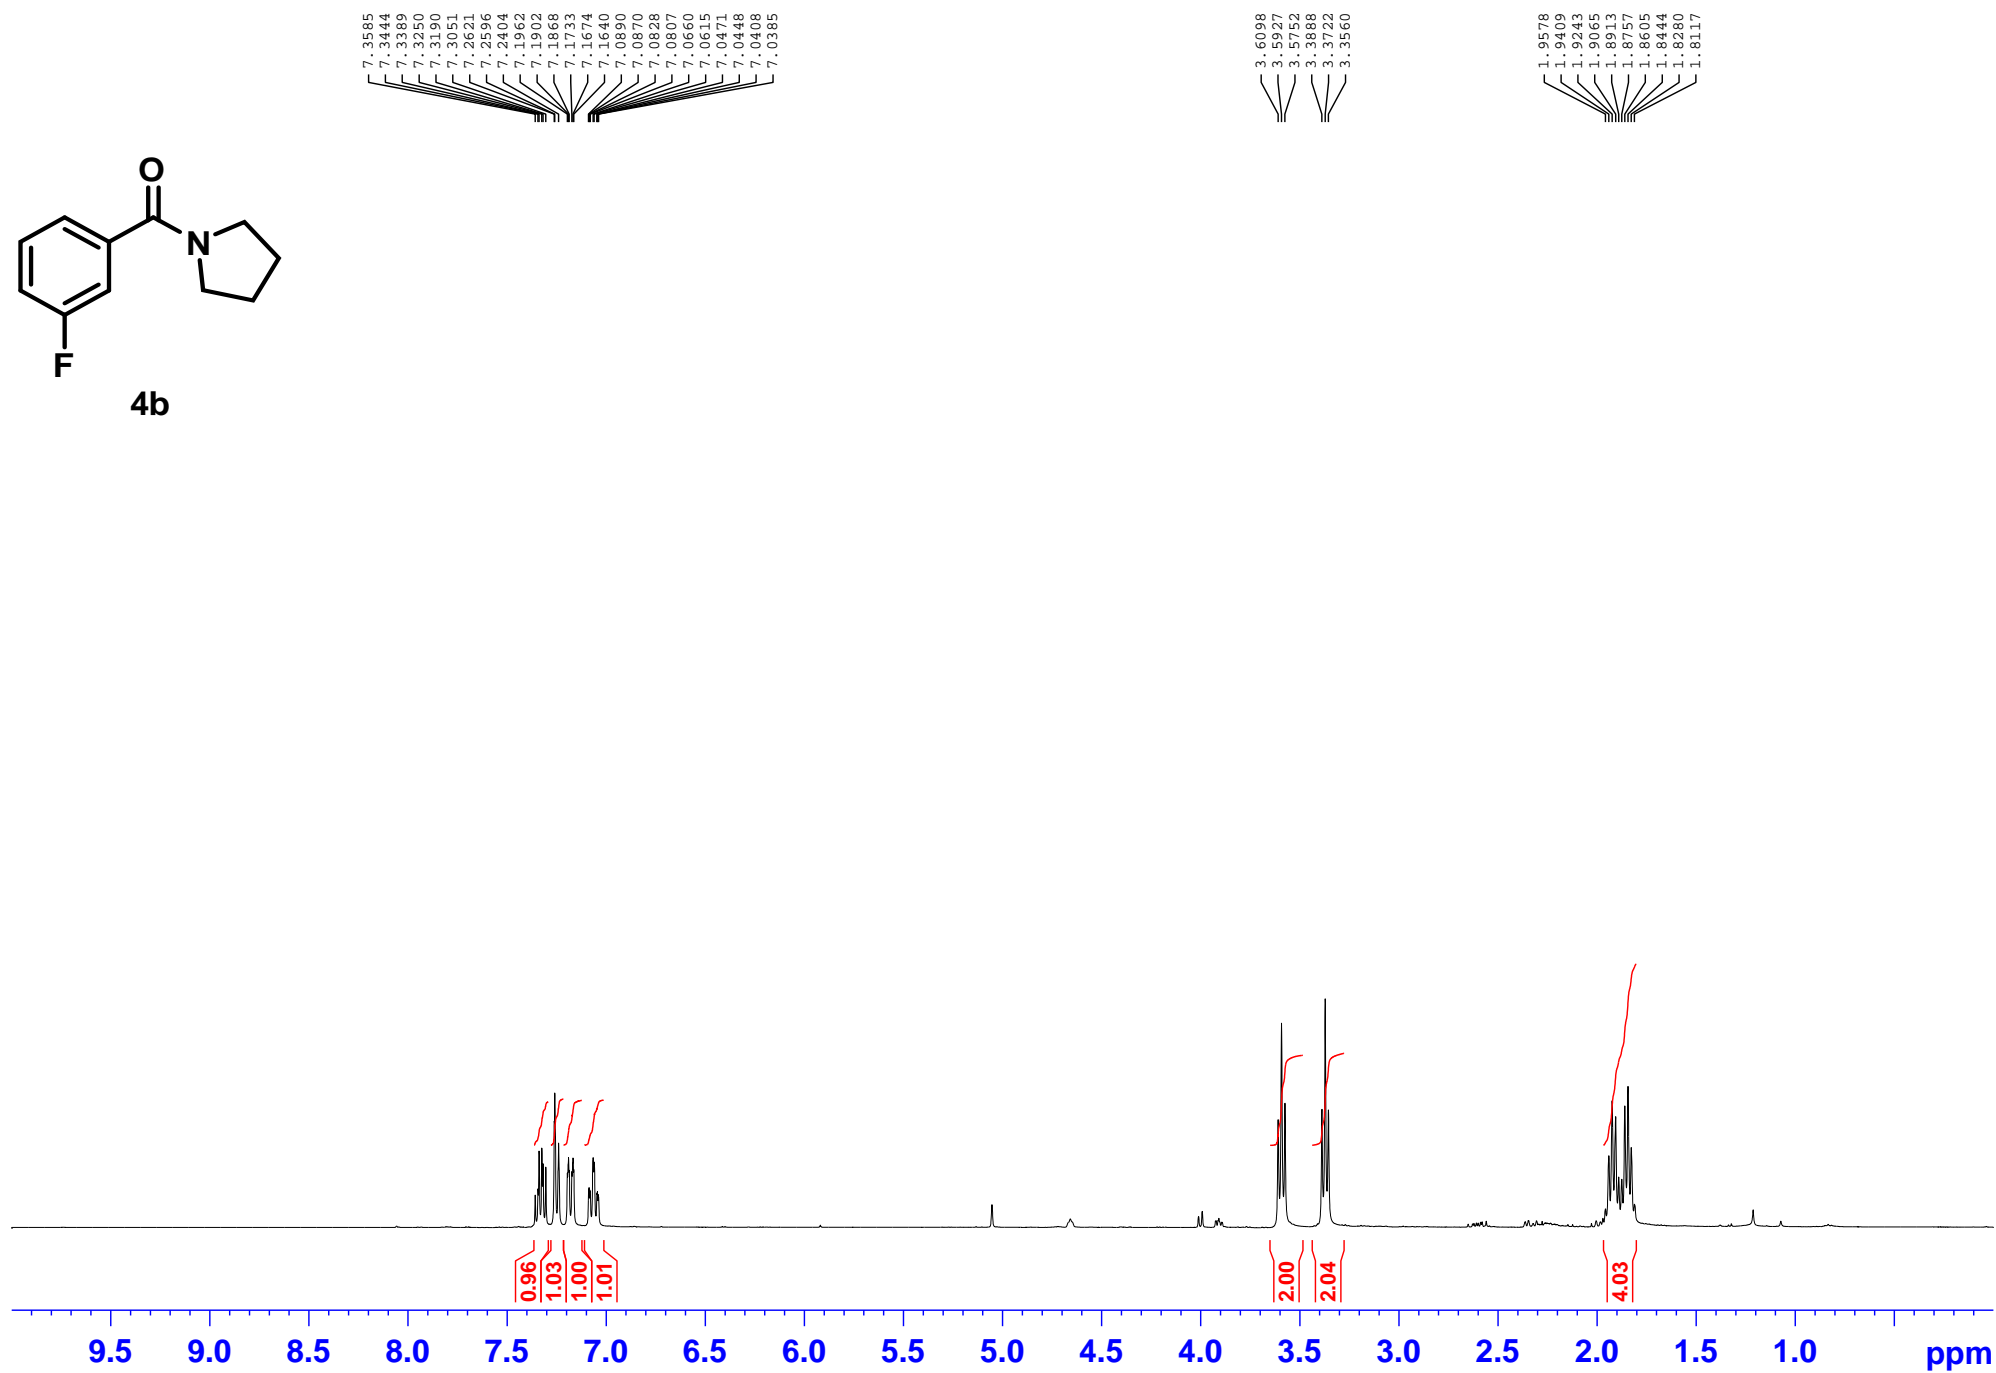

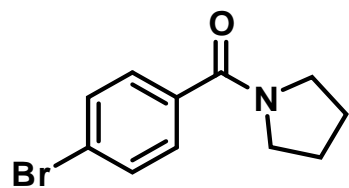

4d

168.6067

136.0216

131.4814

128.8778

124.1259

49.6083

46.2989

26.4331

24.4349

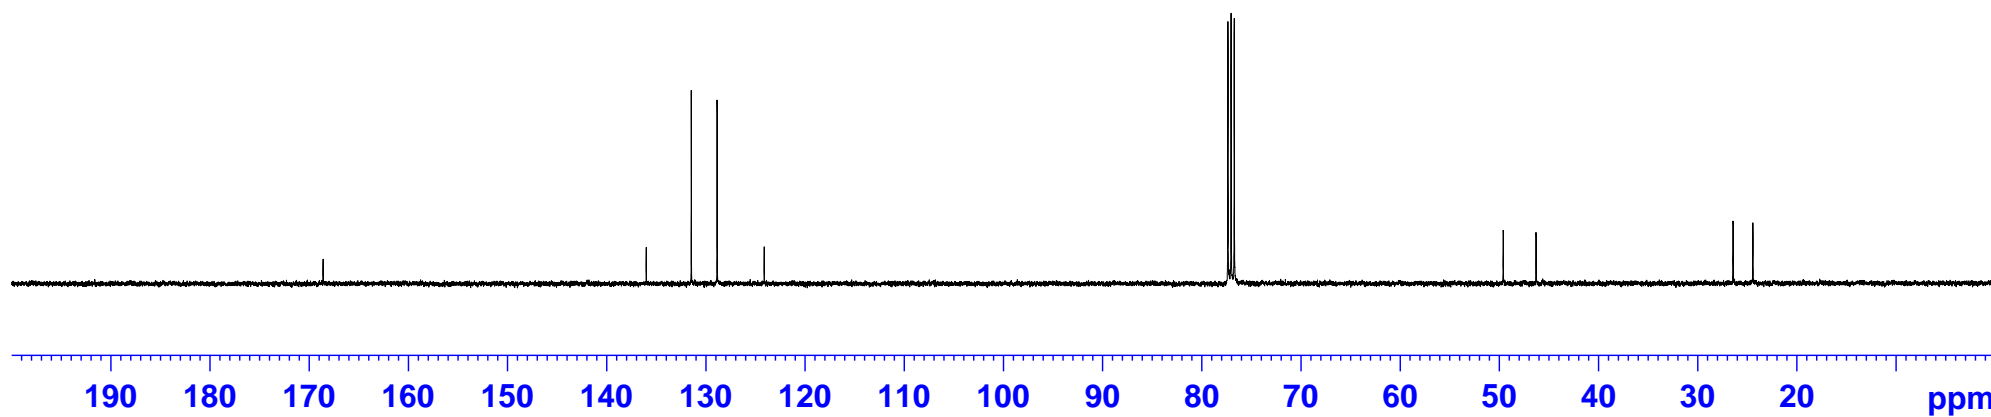

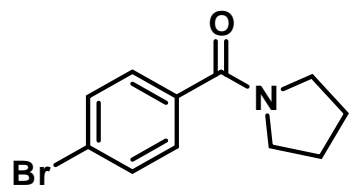

4d

7.5395  
7.5186  
7.4068  
7.3859  
7.2630

3.6423  
3.6253  
3.6078  
3.4195  
3.4029  
3.3867

1.9911  
1.9741  
1.9575  
1.9398  
1.9245  
1.9086  
1.8934  
1.8774  
1.8610  
1.8446

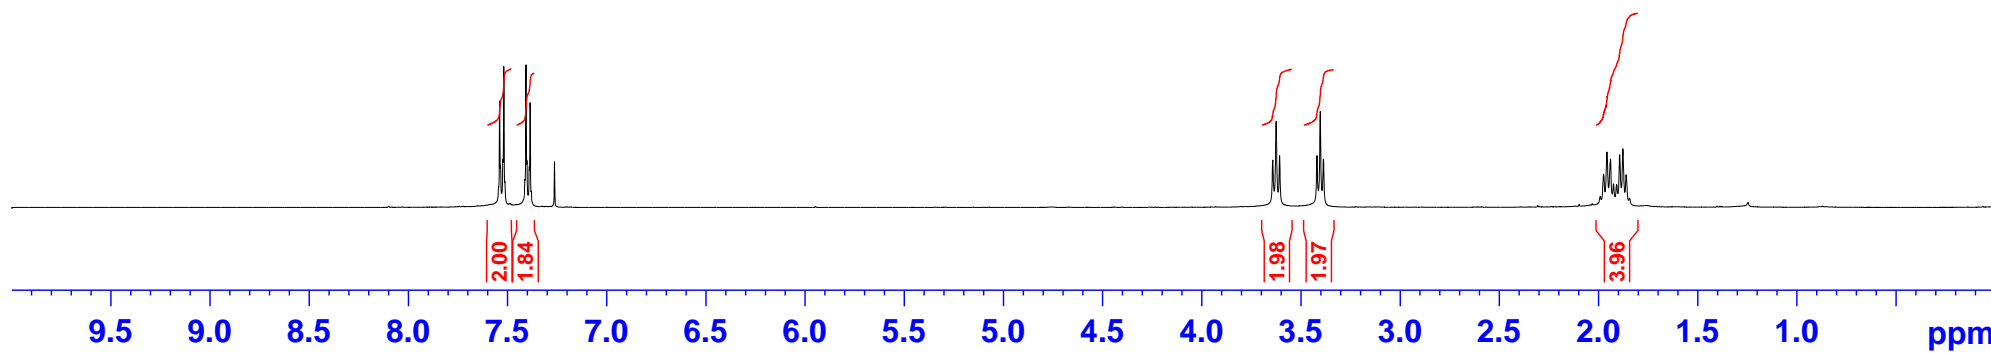

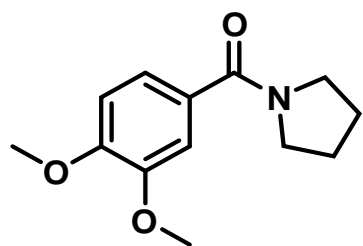

4e

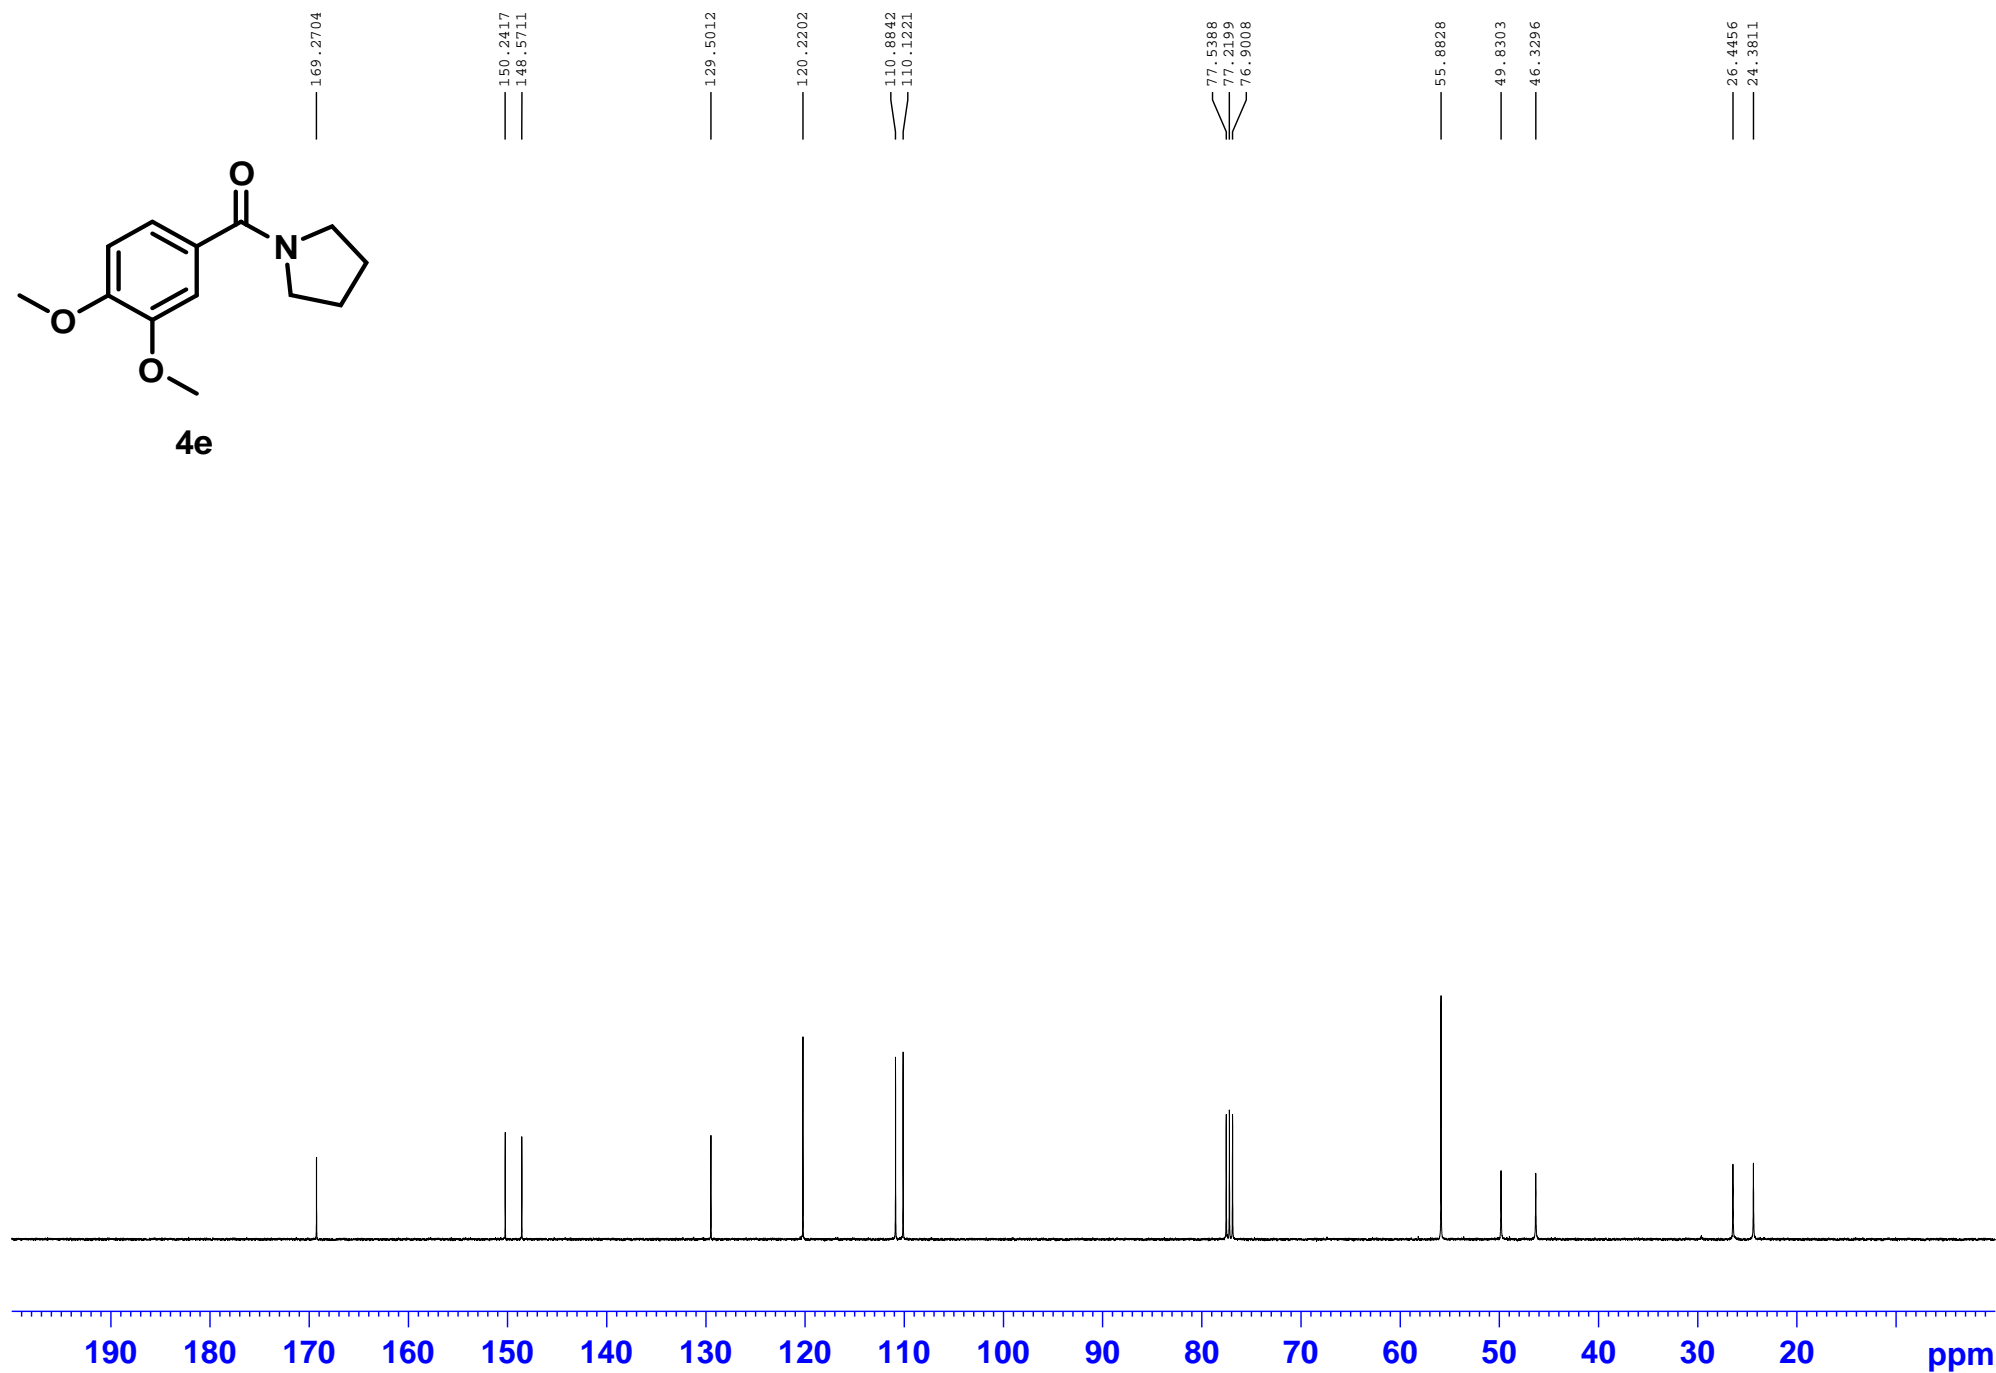

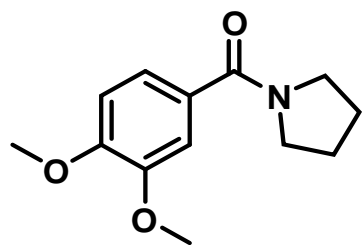

4e

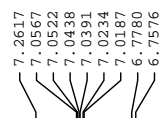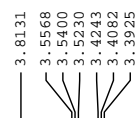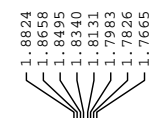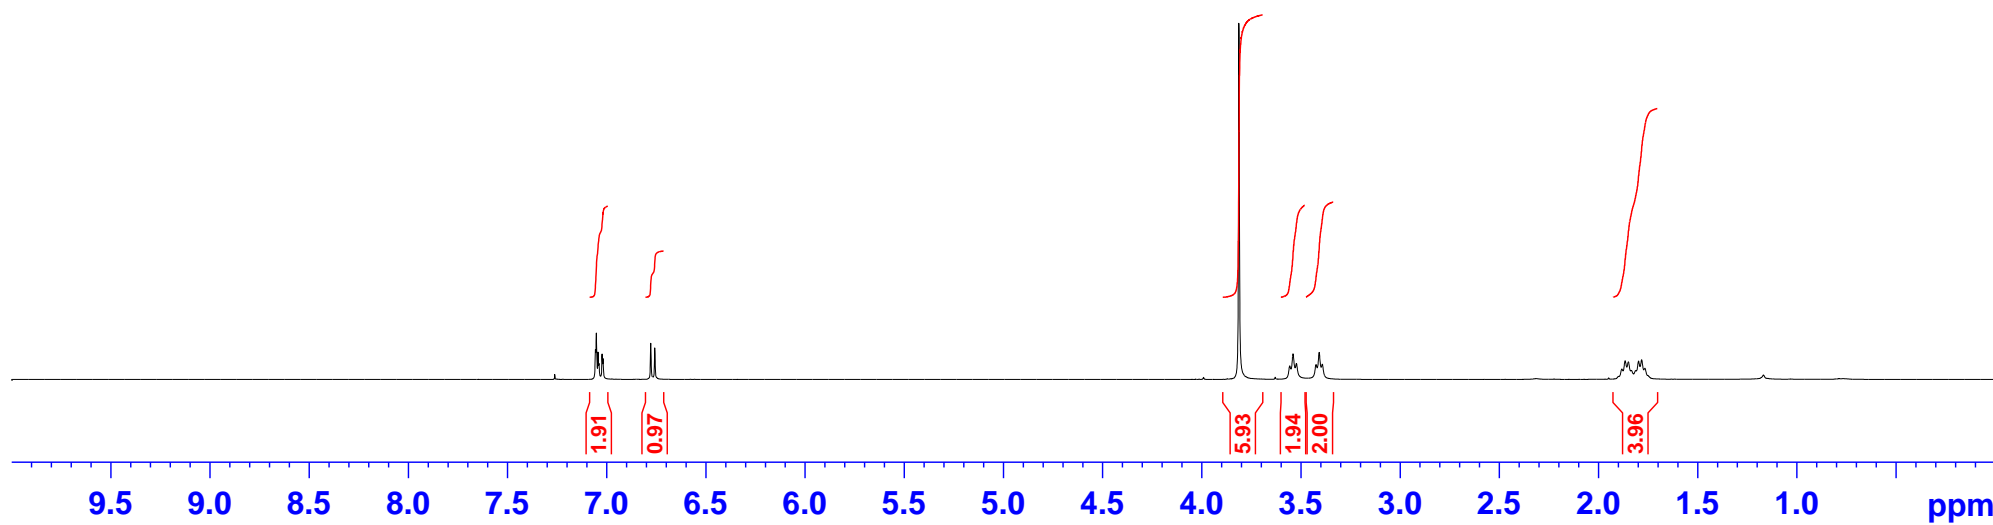

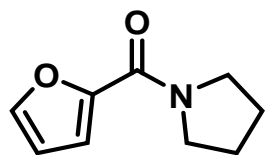

4h

158.1029

148.7052

144.0196

115.7016

111.3042

77.4543  
77.1361  
76.8177

47.7940  
46.9980

26.5572  
23.7174

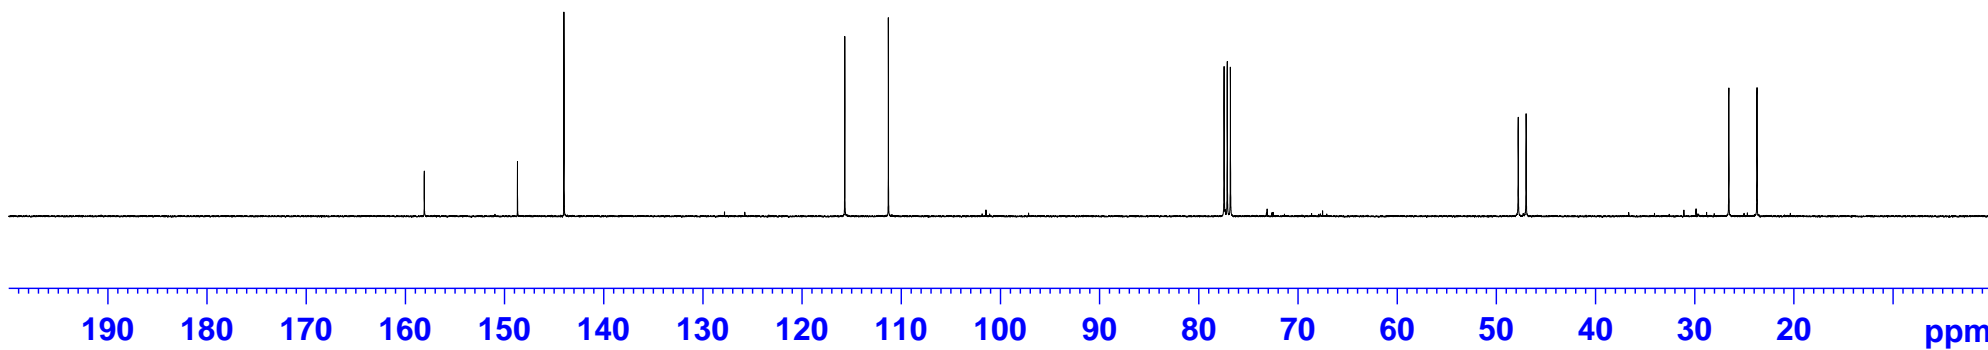



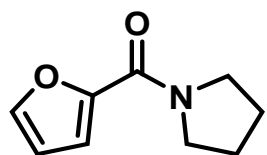

4h

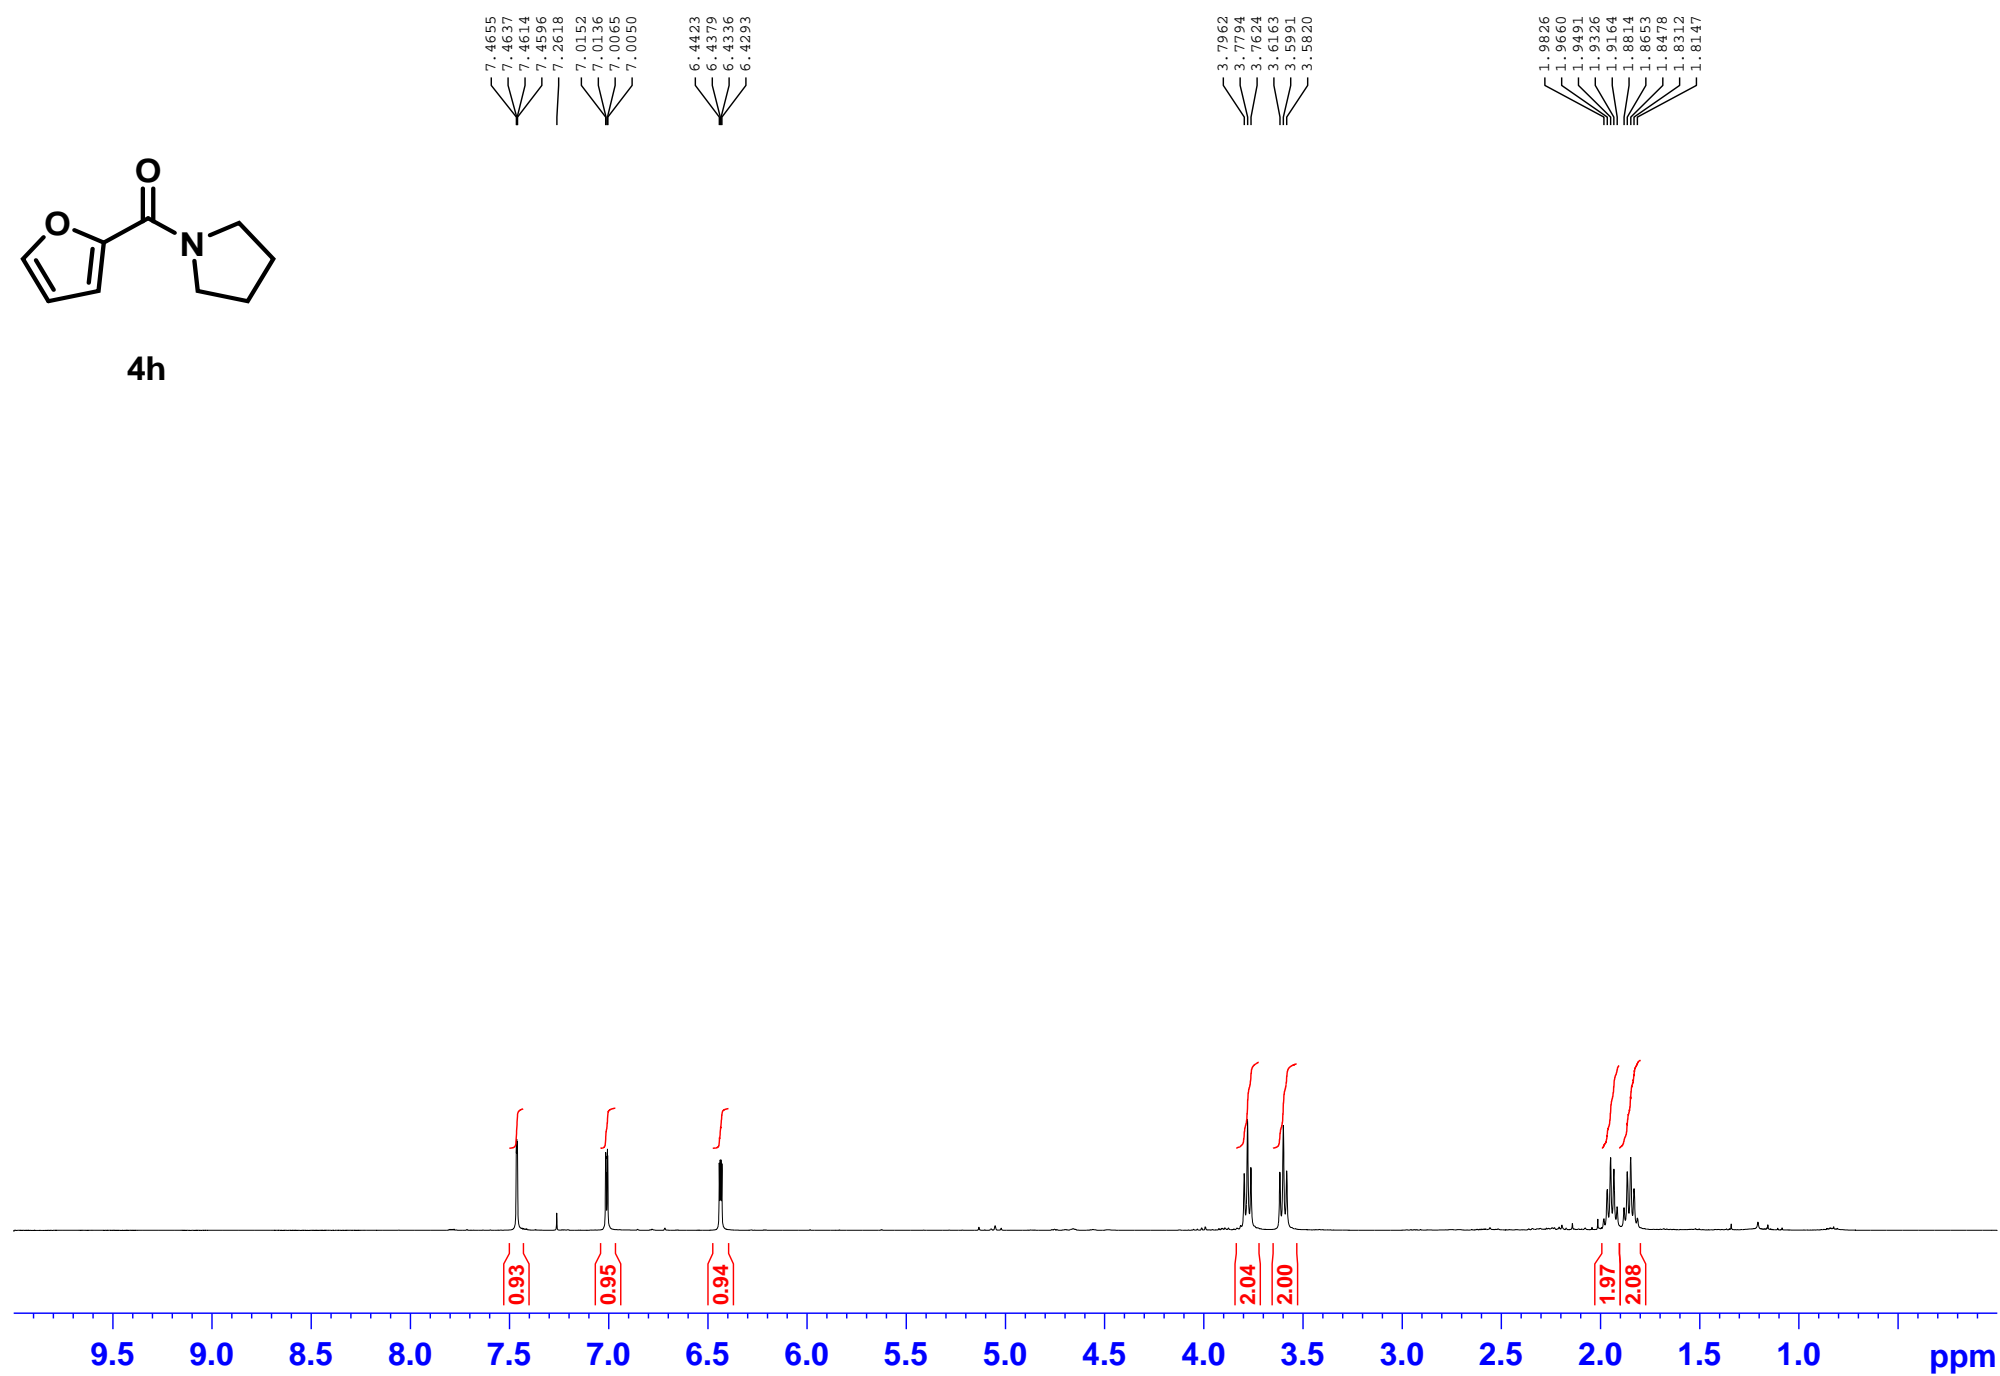

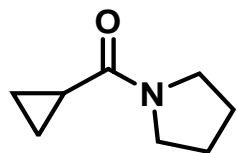

4j

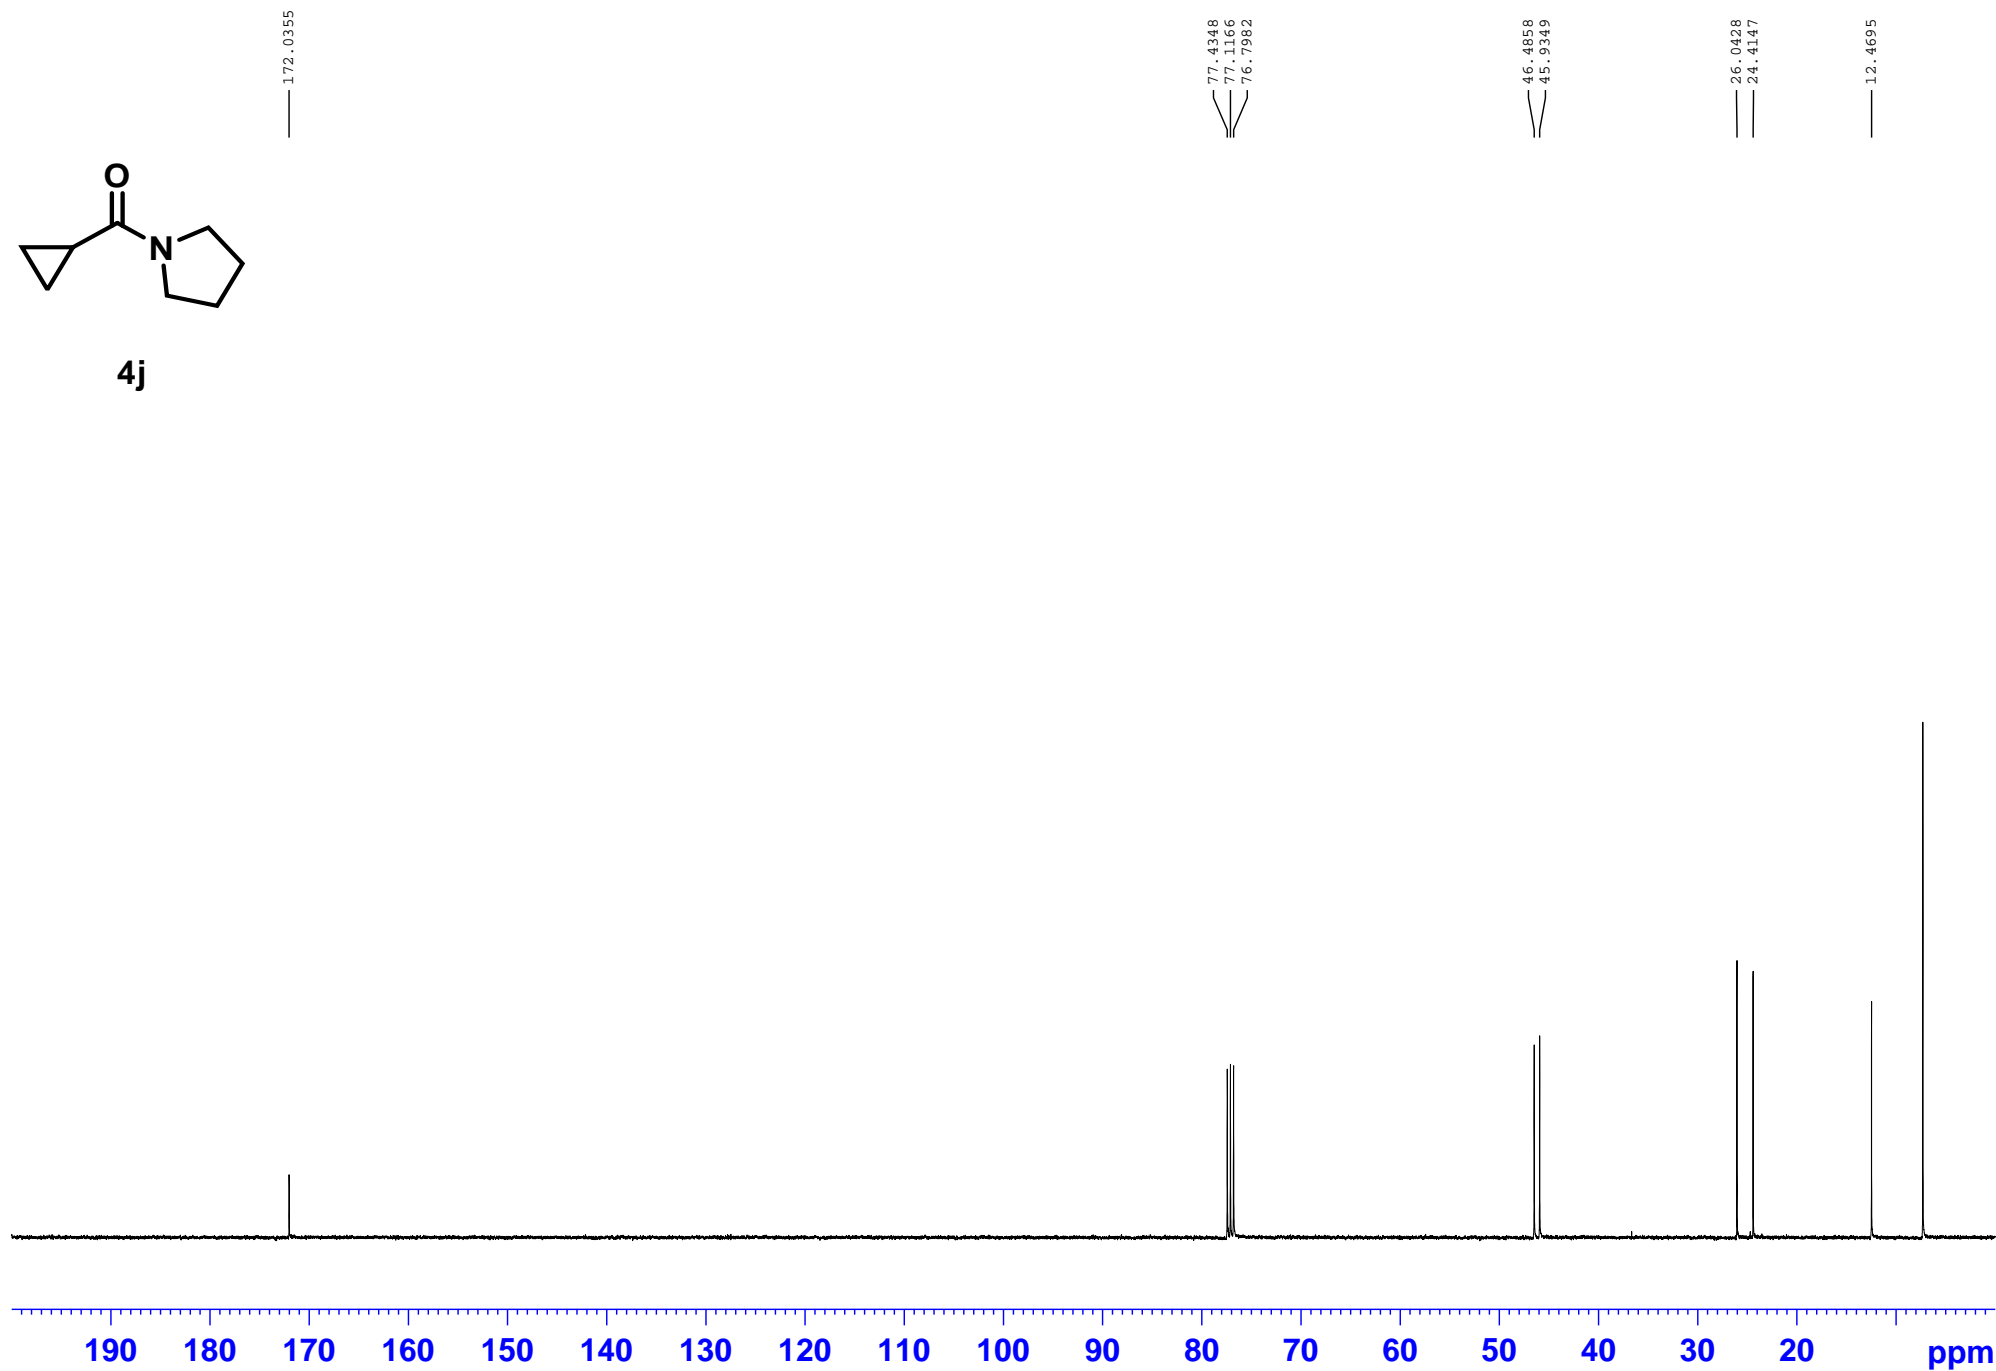

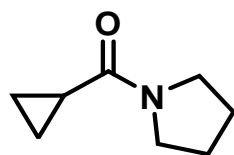

4j

7.2622

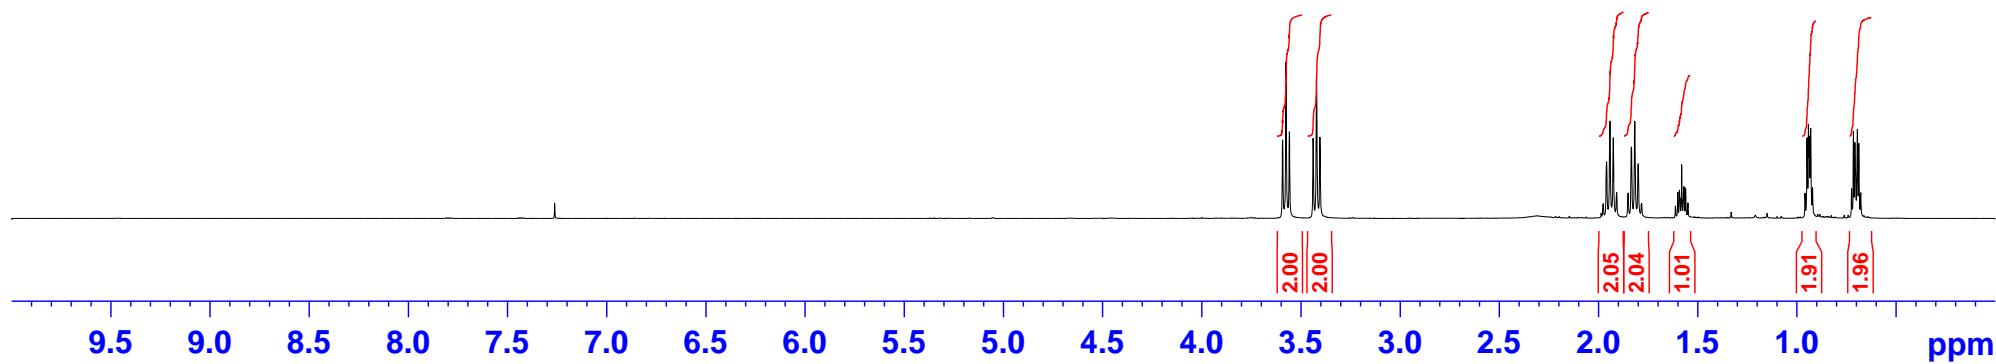

3.5927  
3.5756  
3.5685  
3.4387  
3.4215  
3.4043

1.9764  
1.9594  
1.9424  
1.9258  
1.9087  
1.8509  
1.8344  
1.8173  
1.8000  
1.7825  
1.6123  
1.6006  
1.5923  
1.5808  
1.5692  
1.5609  
1.5493  
0.9589  
0.9450  
0.9418  
0.9378  
0.9303  
0.9213  
0.7240  
0.7153  
0.7076  
0.6954  
0.6878  
0.6782

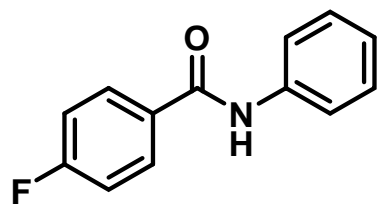

5a

166.1873  
164.6496  
163.6752

137.7407  
131.1729  
131.1419  
129.4515  
129.3621  
129.1726  
124.7457  
120.2310  
116.0289  
115.8107

77.3467  
77.0292  
76.7116

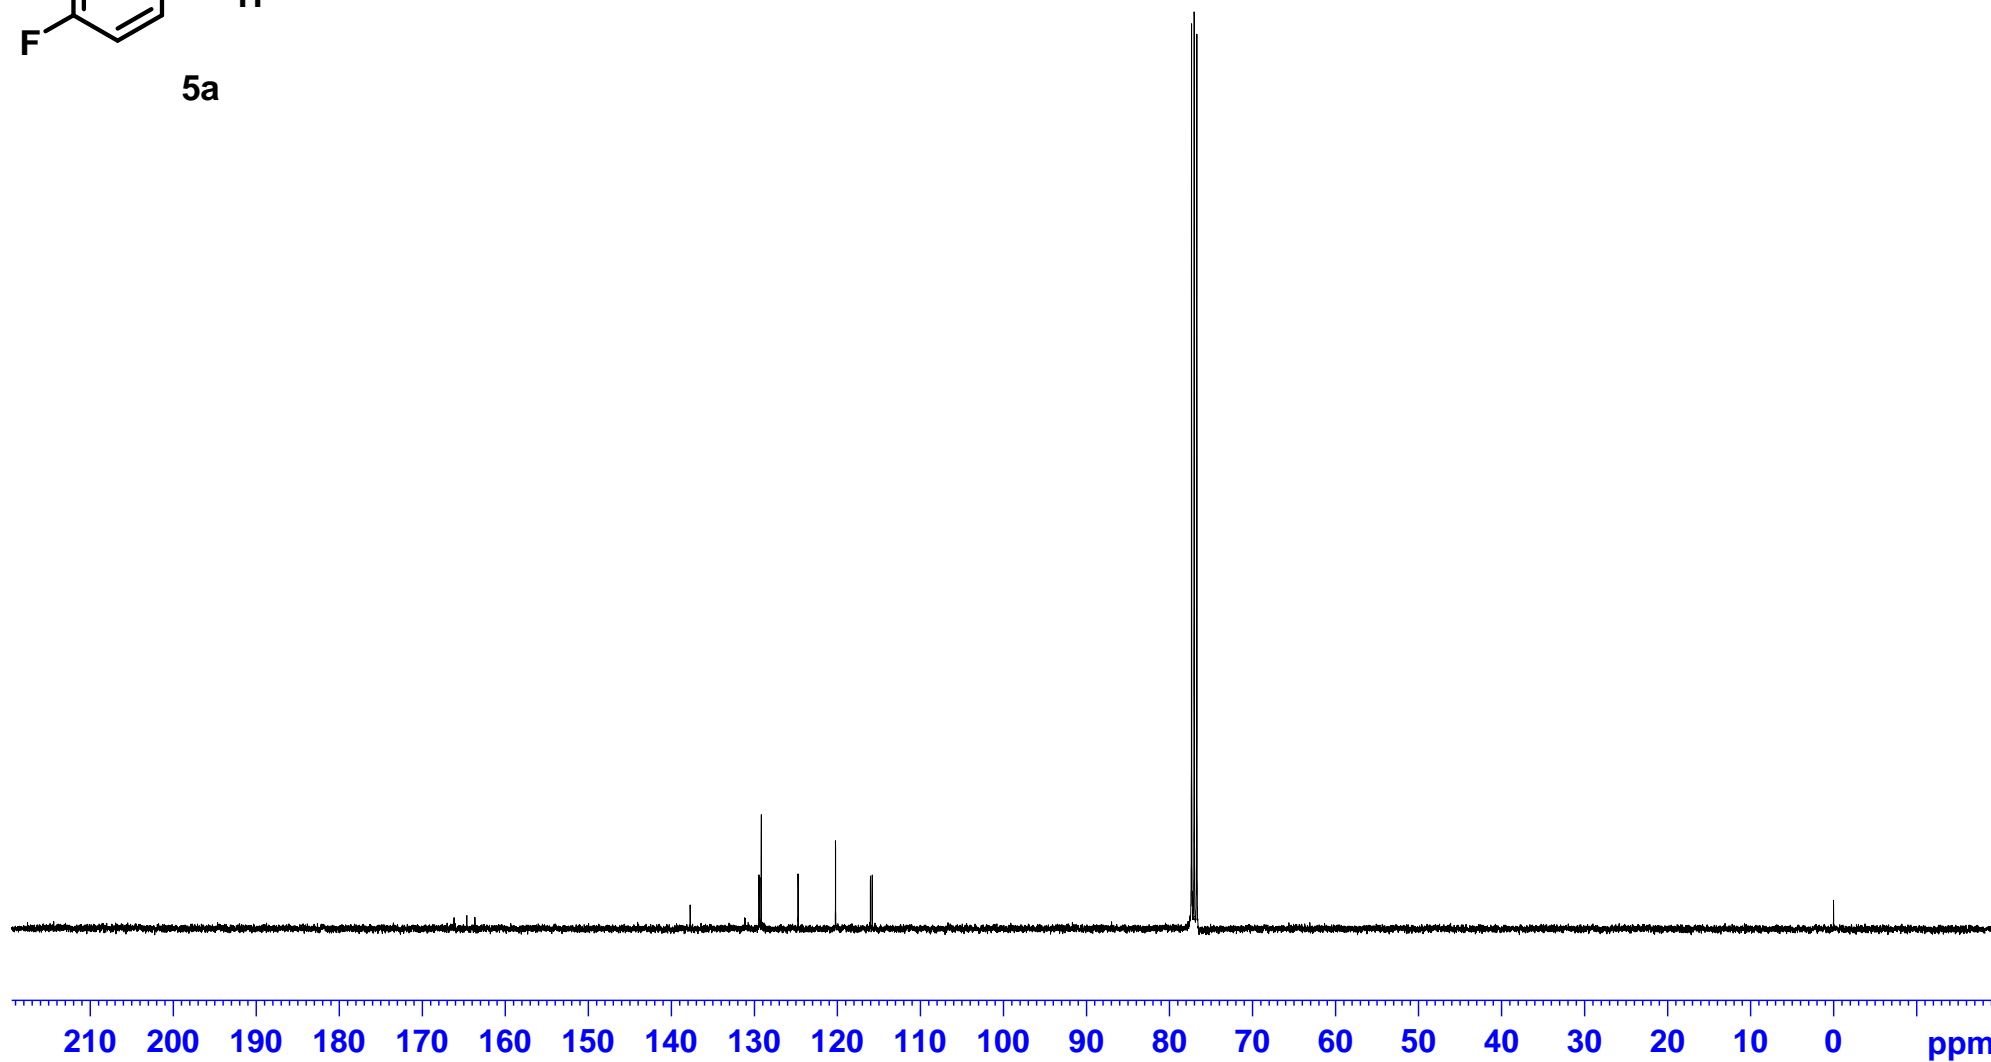

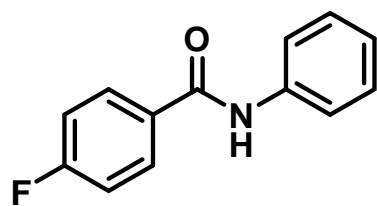

5a

— -107.37

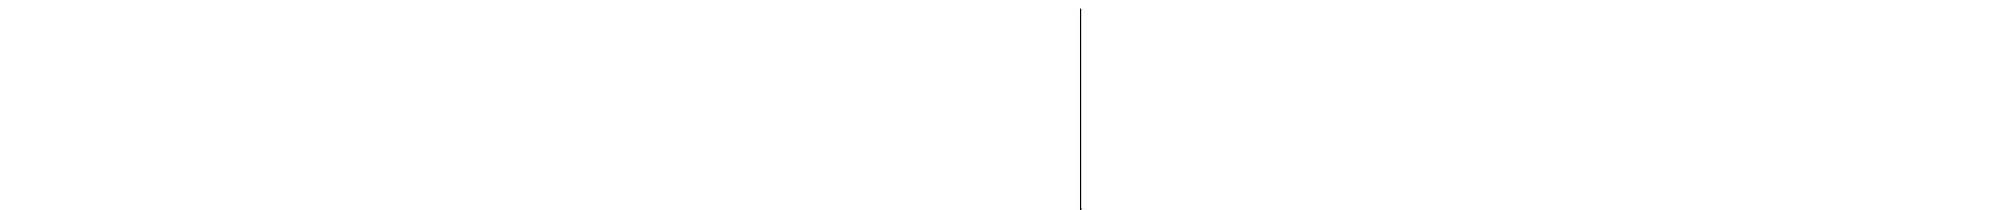

-20

-40

-60

-80

-100

-120

-140

-160

-180

ppm

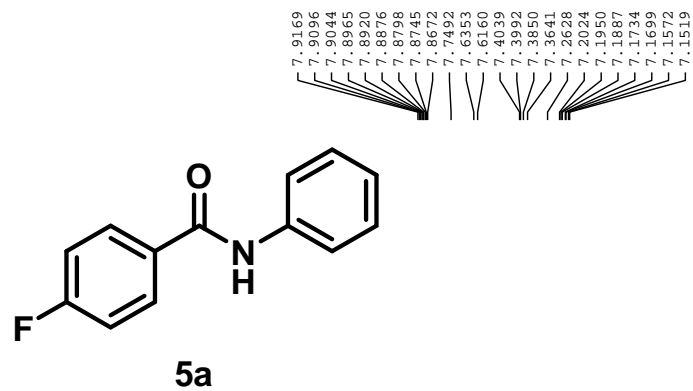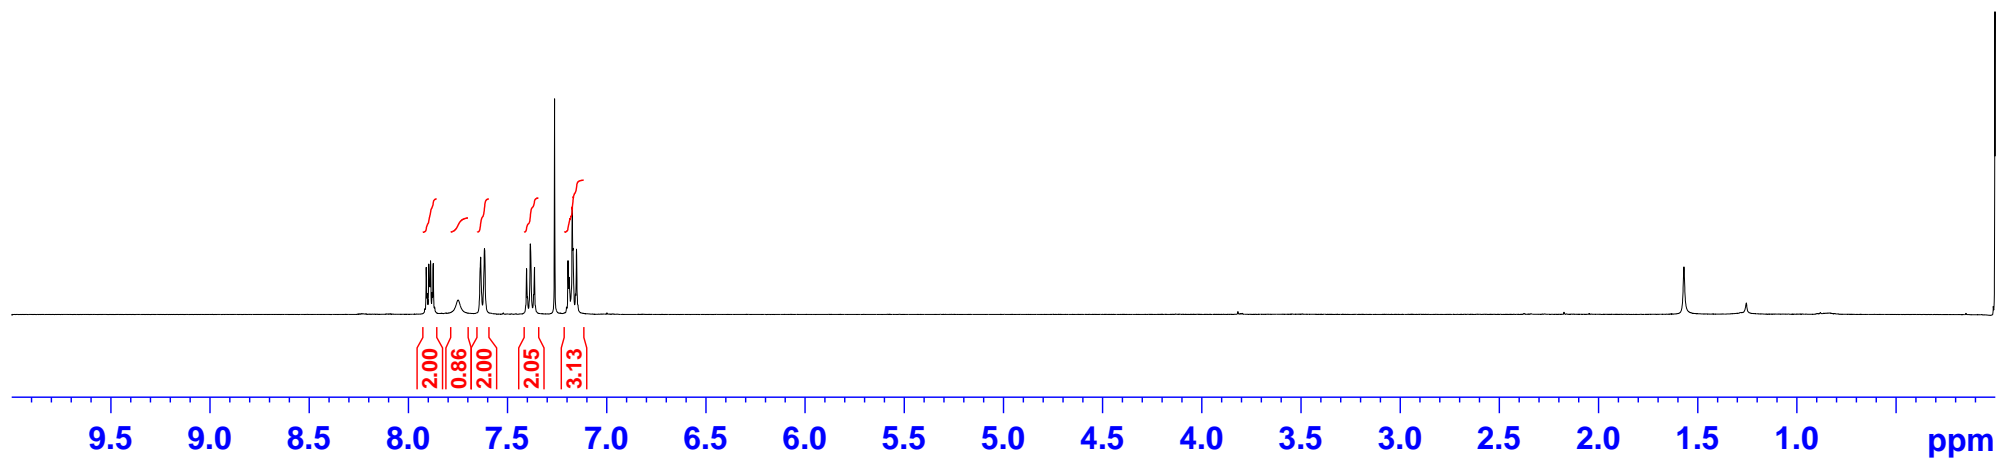

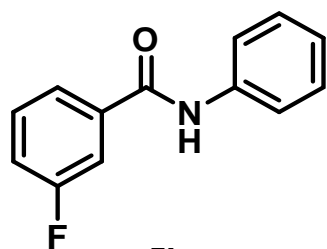

5b

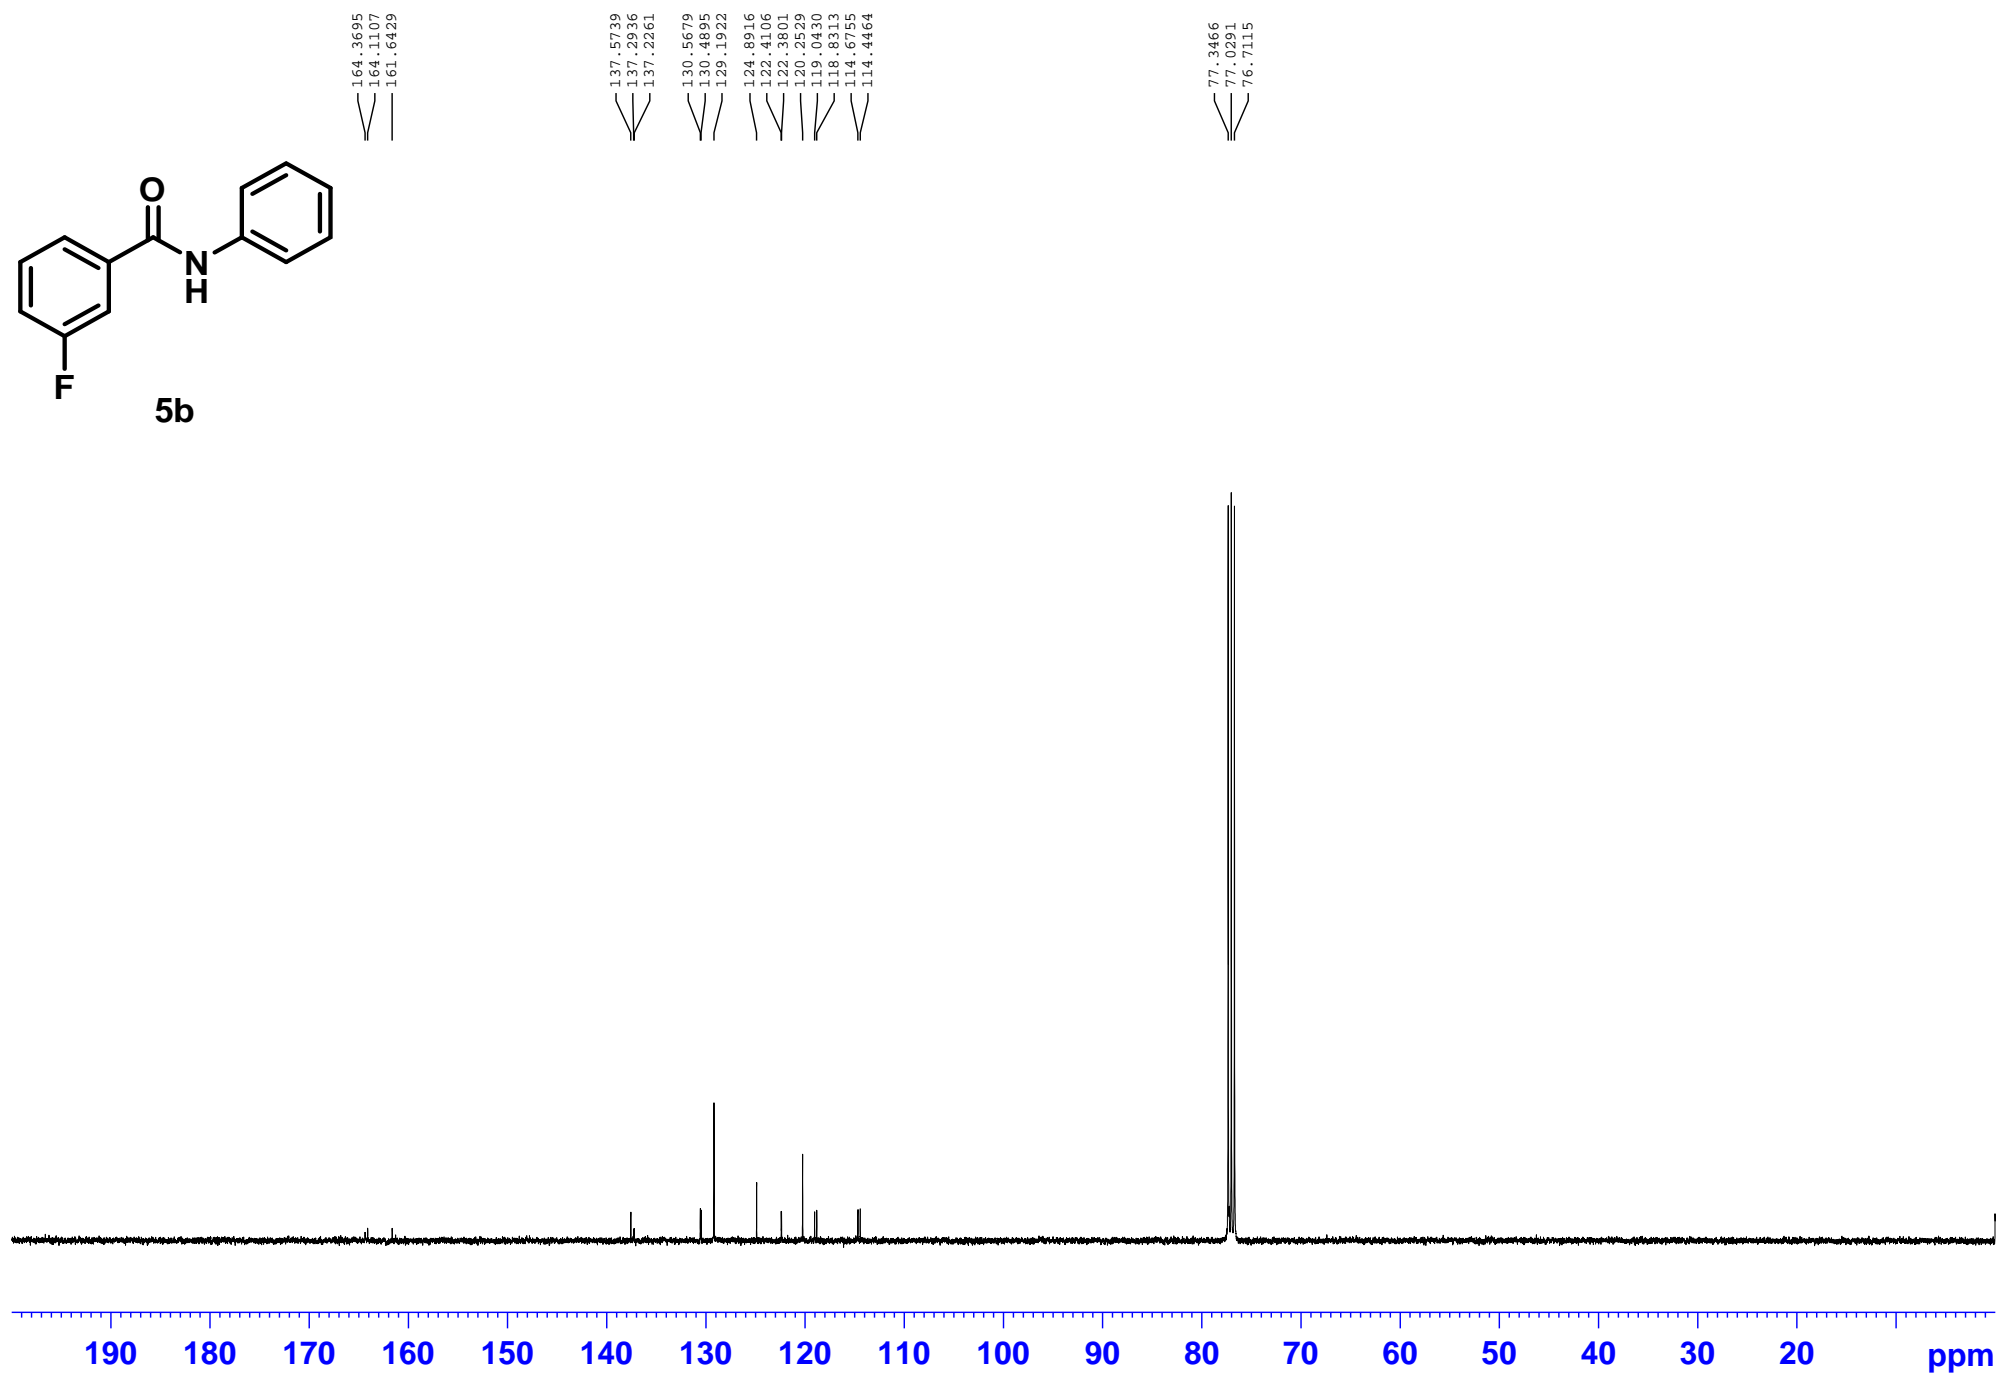

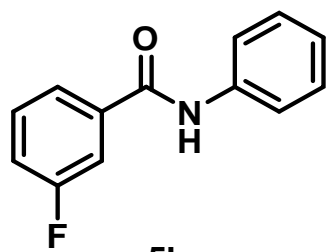

5b

-111.21

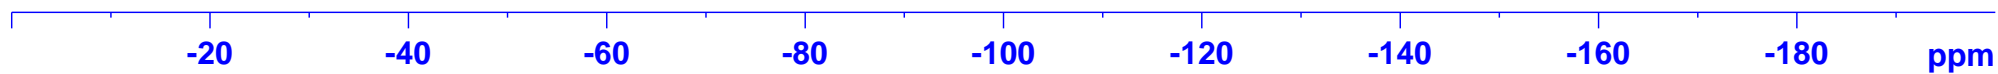



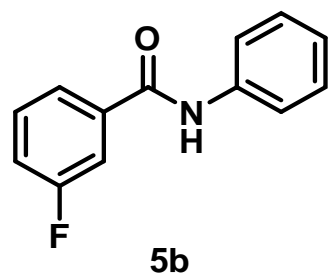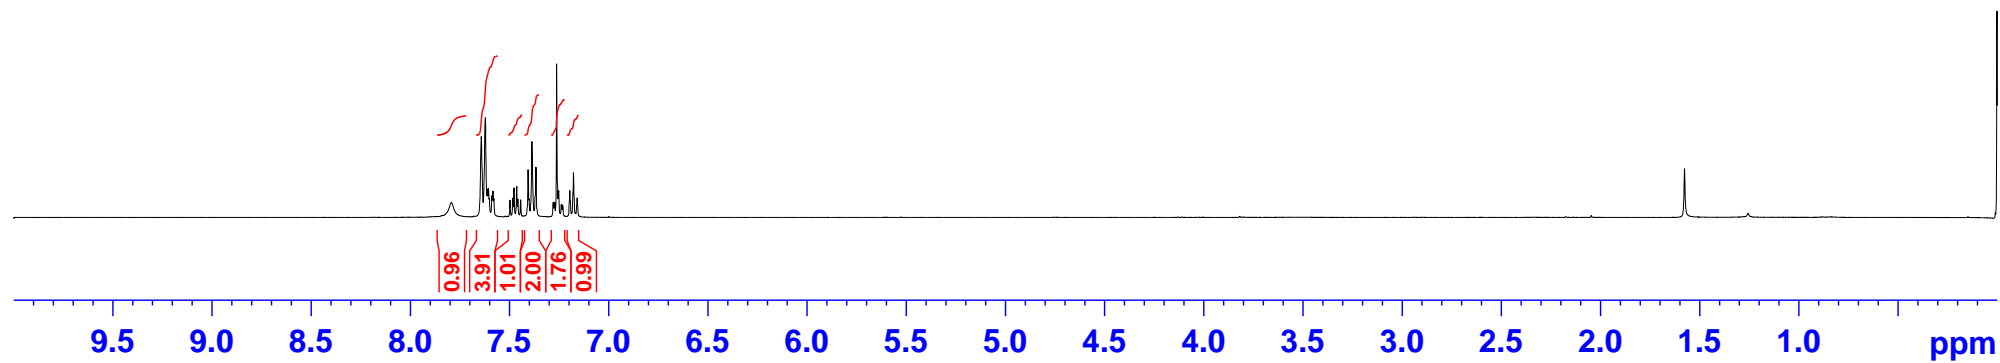

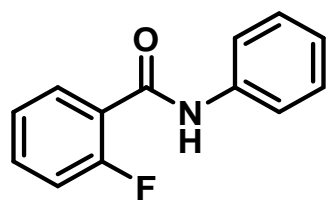

5c

161.5648  
161.4143  
161.3800  
159.1137

137.7473  
133.7659  
133.6726  
132.1719  
132.1540  
129.0933  
125.0905  
125.0583  
124.7800  
121.5439  
121.4308  
120.5591  
116.2762  
116.0282

77.4476  
77.1296  
76.8117

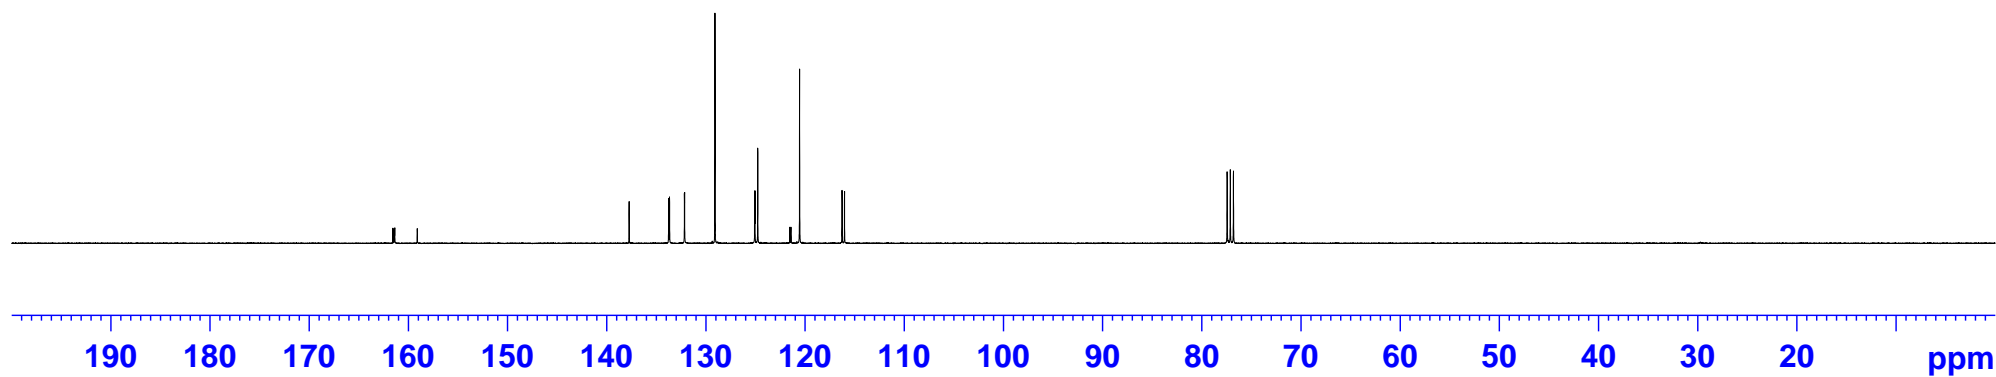

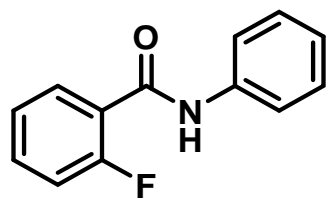

5c

— -113.14

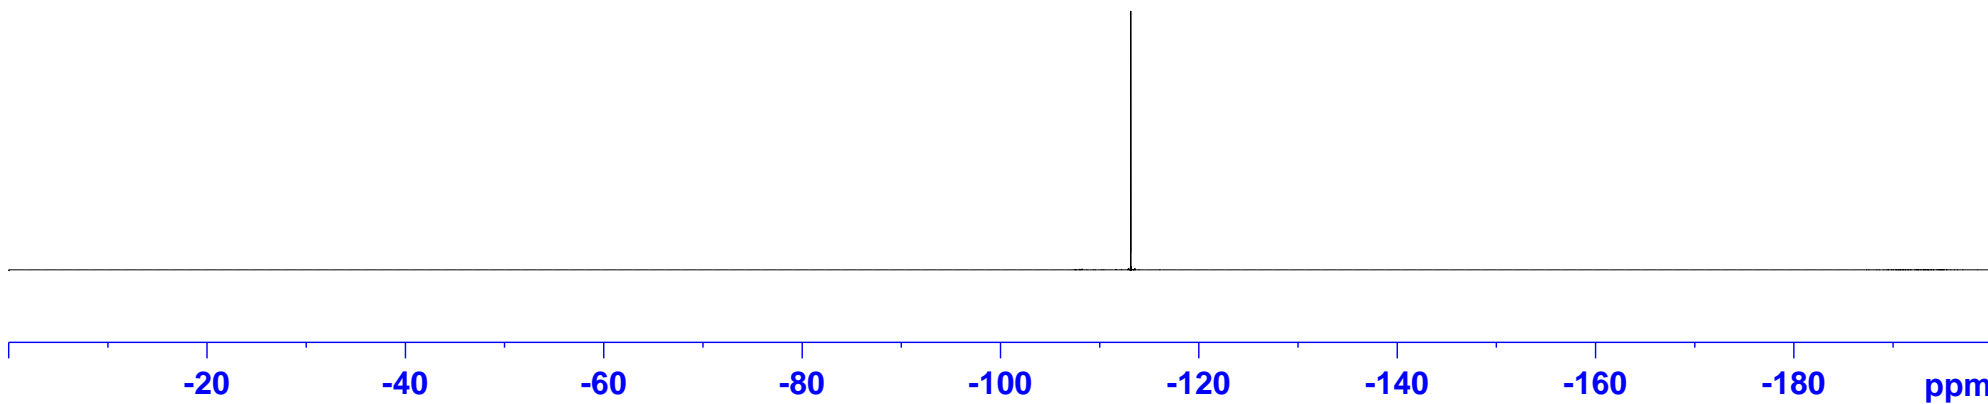

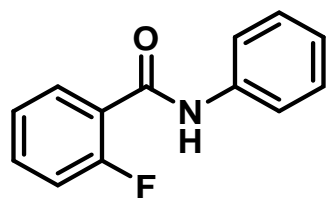

5c

8.5225  
8.4867  
8.1524  
8.1480  
8.1326  
8.1282  
8.1128  
8.1083  
7.6810  
7.6617  
7.5257  
7.5211  
7.5125  
7.5074  
7.5028  
7.4936  
7.4918  
7.4870  
7.4820  
7.4735  
7.4689  
7.3897  
7.3706  
7.3500  
7.3042  
7.3020  
7.2837  
7.2662  
7.2638  
7.1805  
7.1616  
7.1498  
7.1474  
7.1435  
7.1291  
7.1276

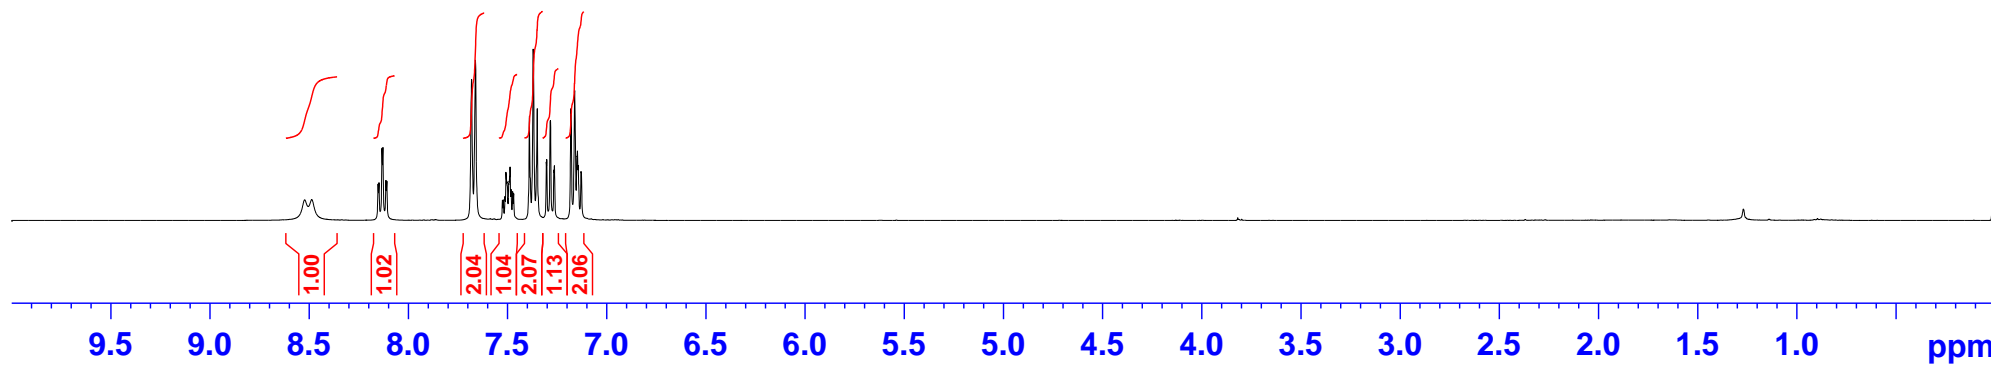

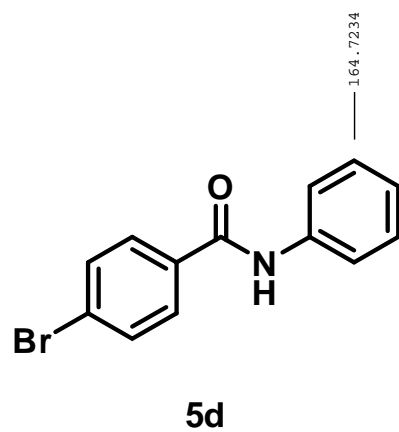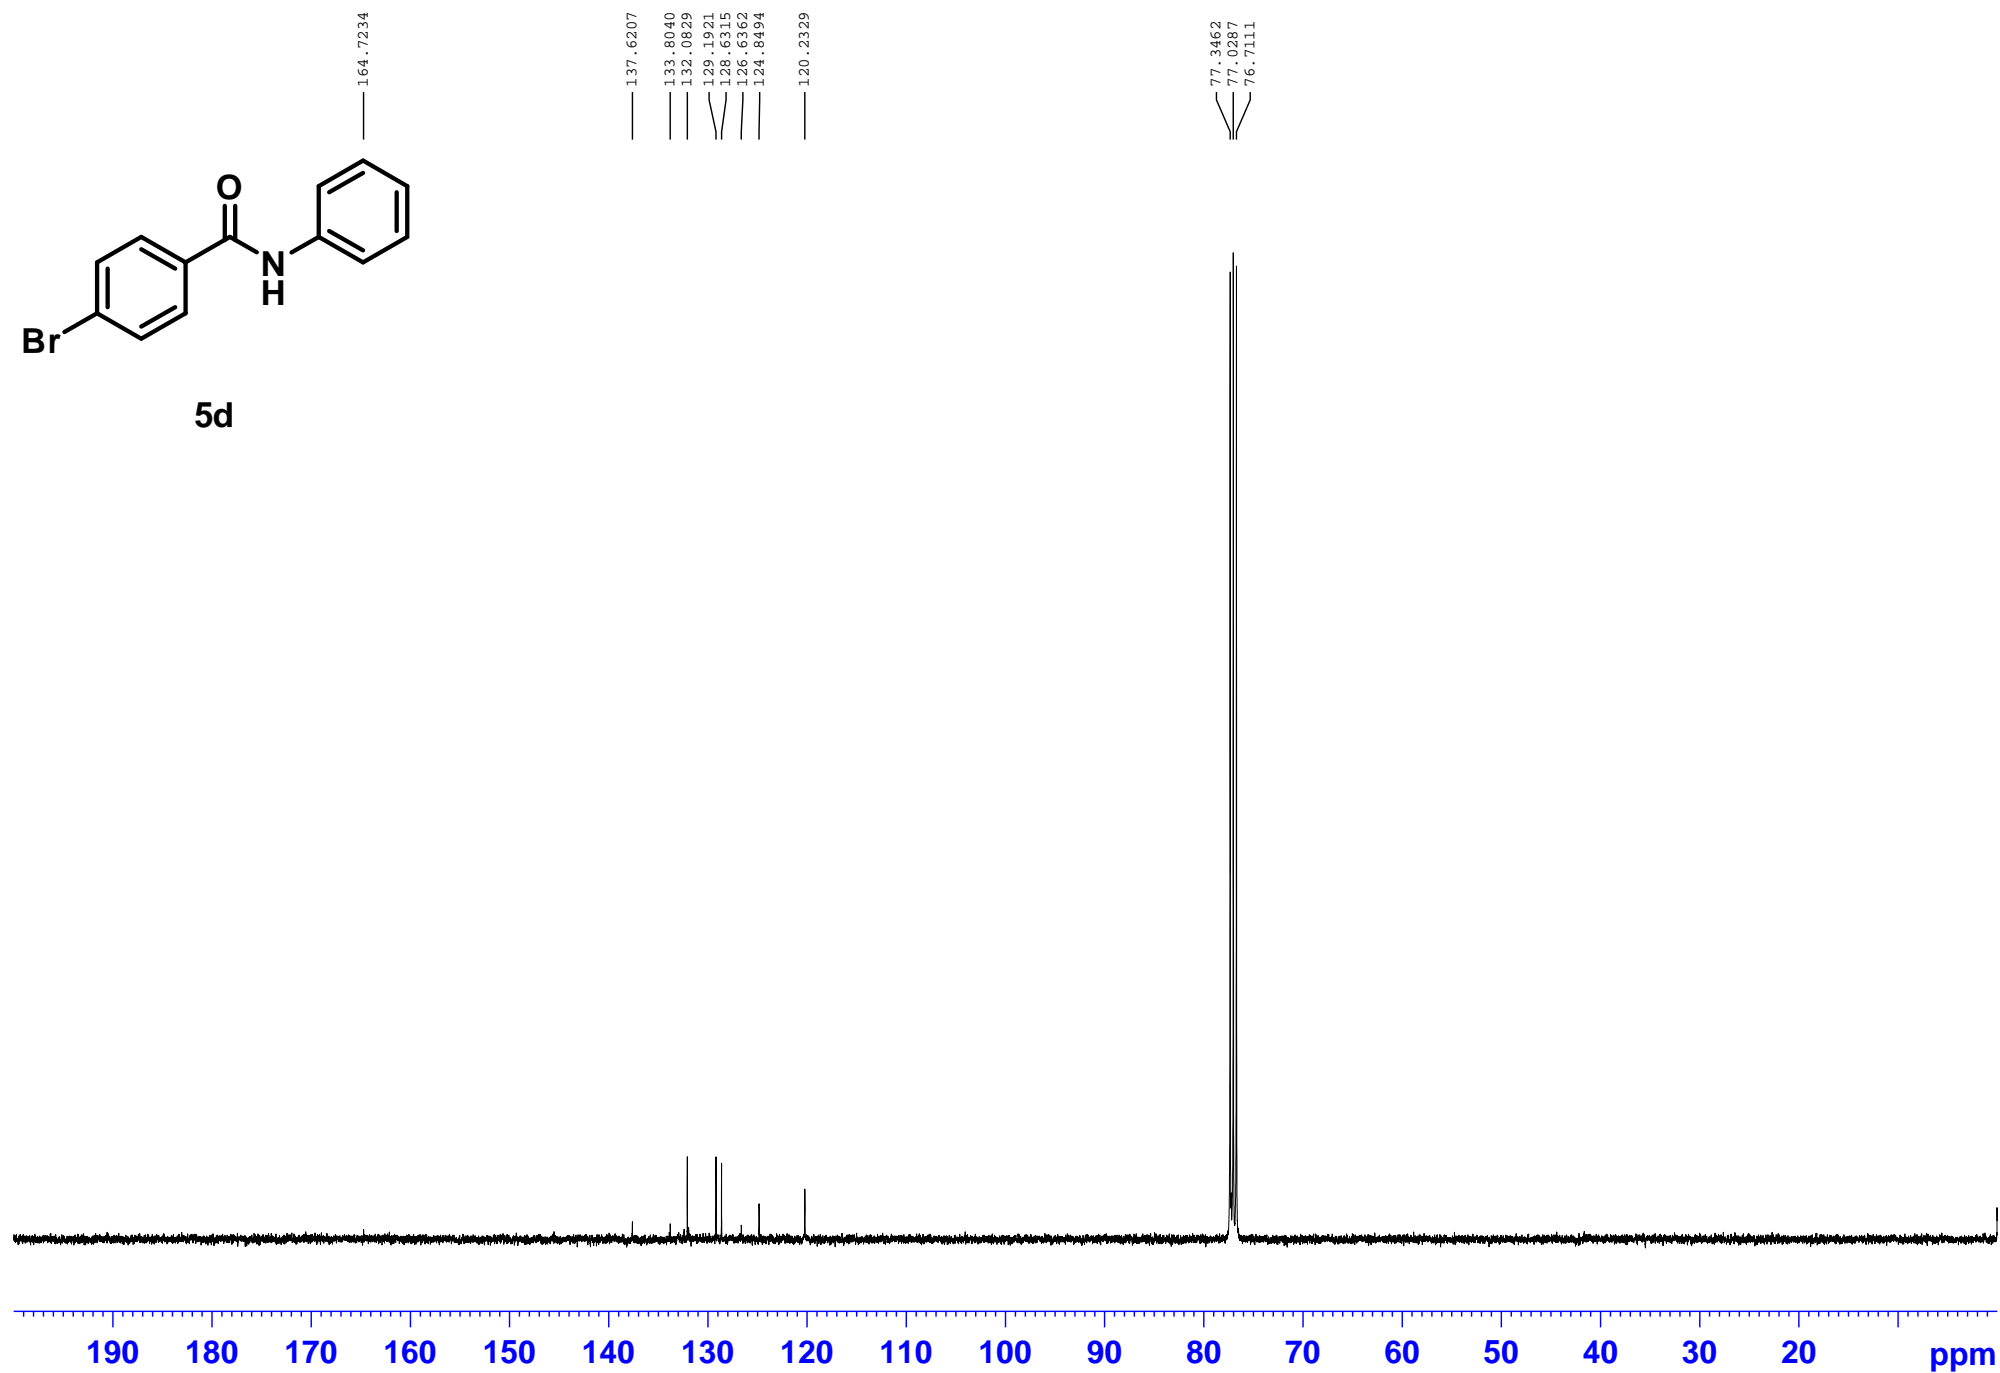

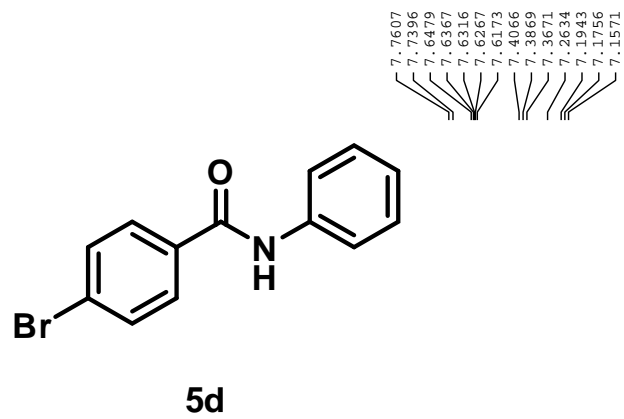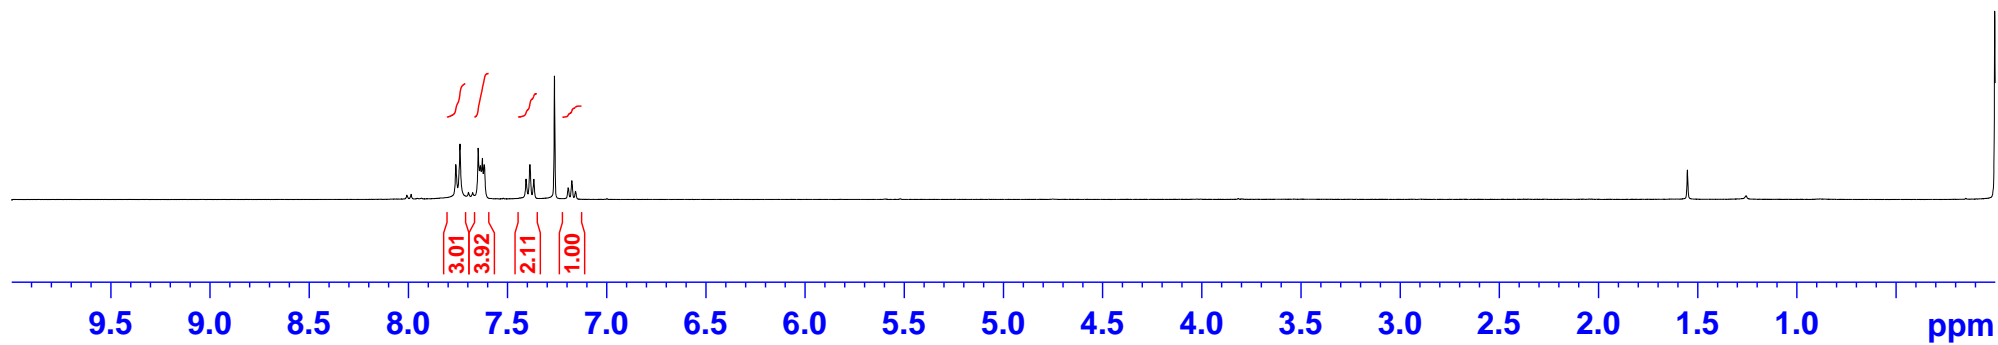

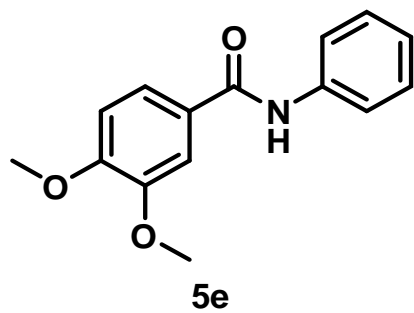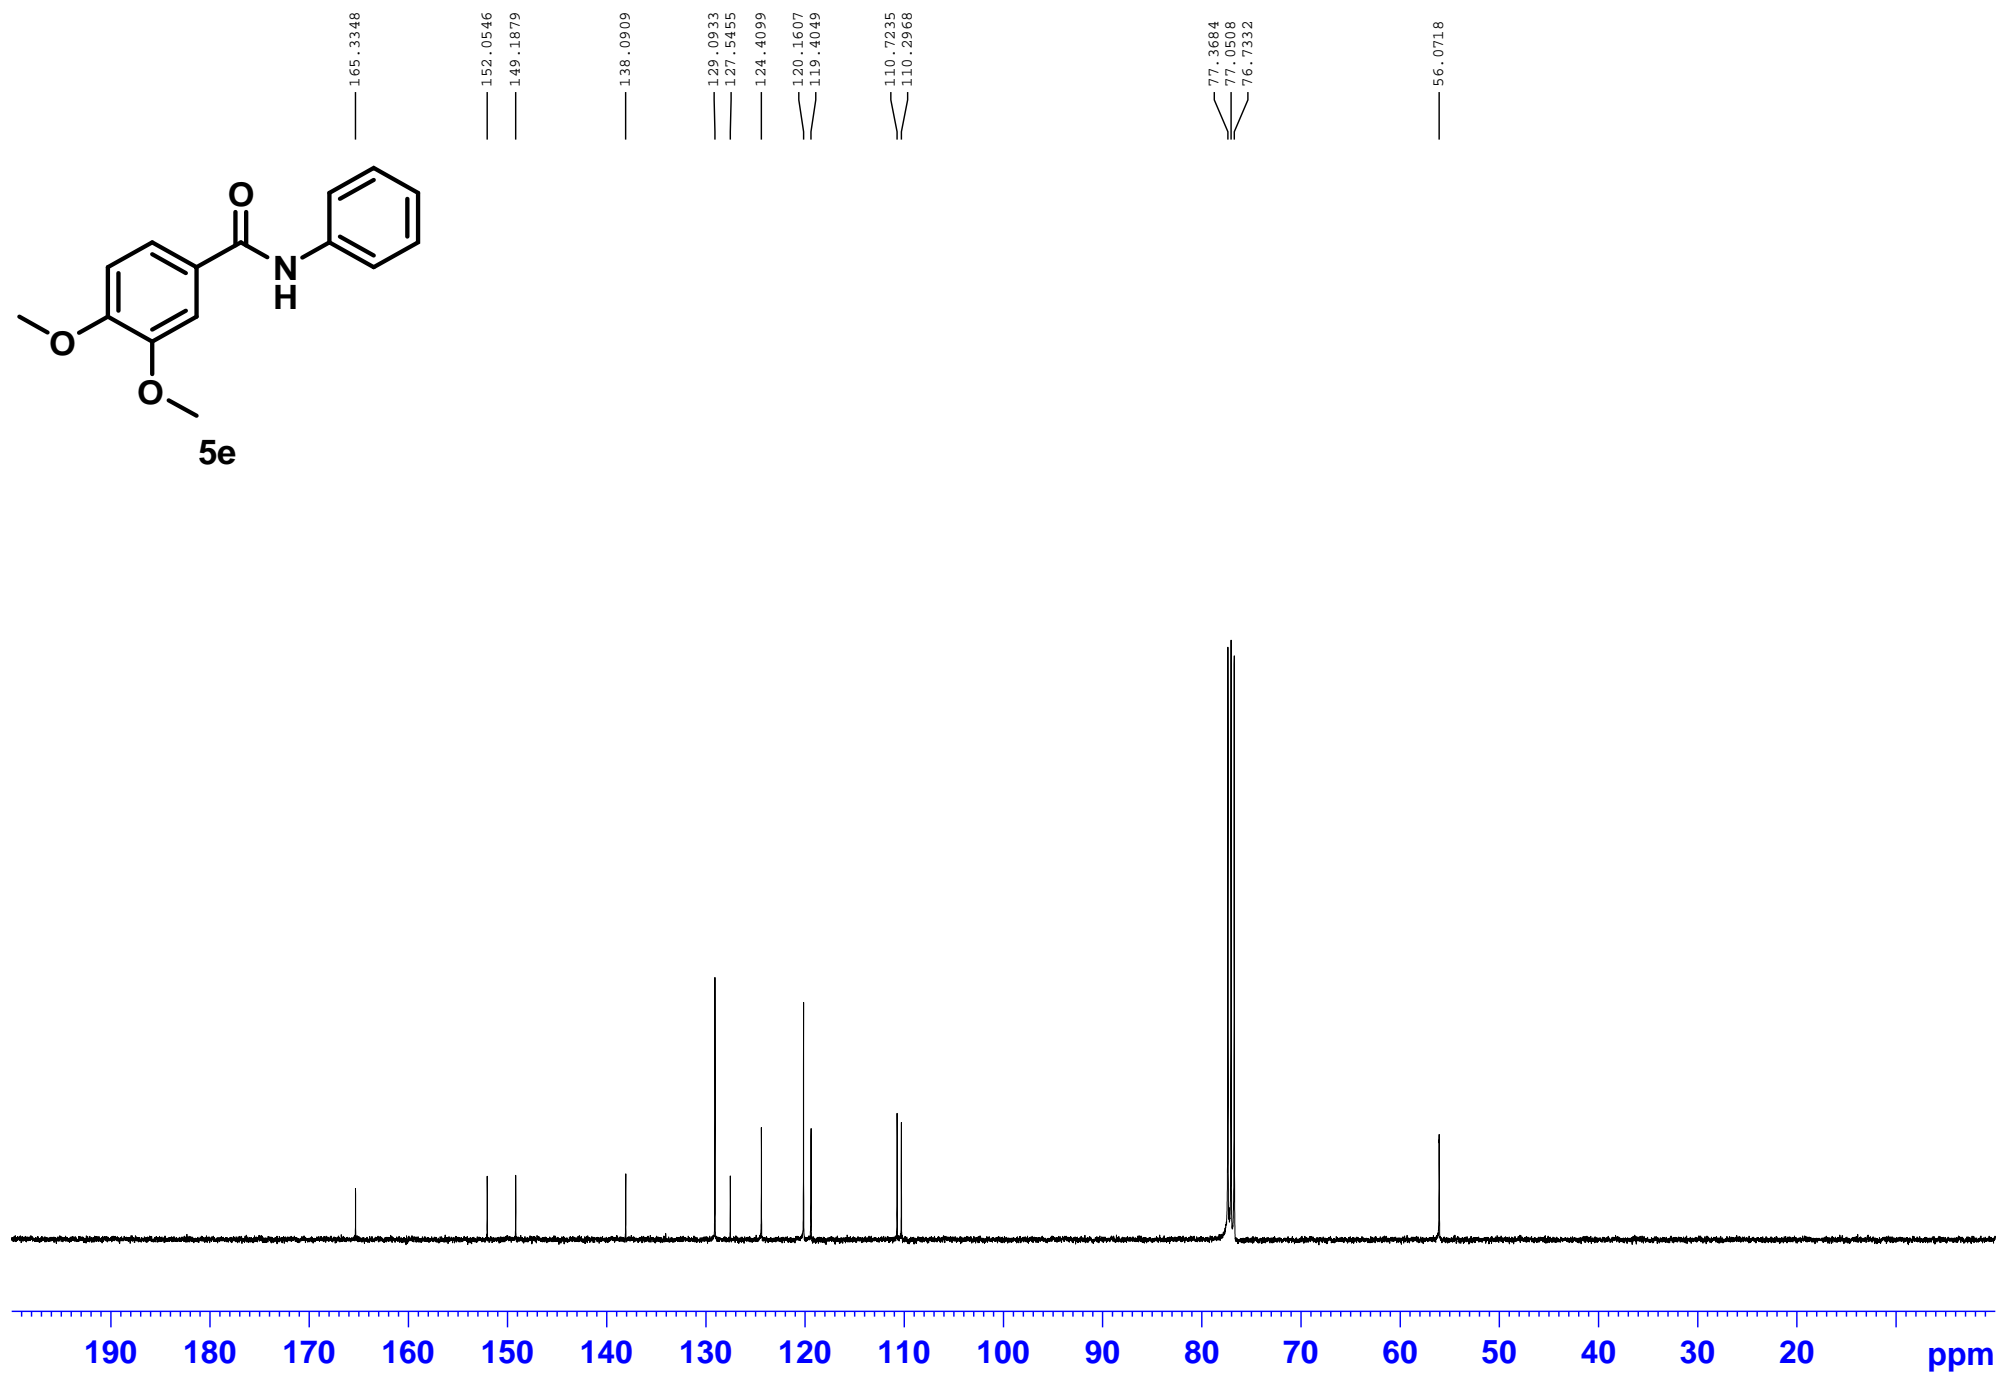

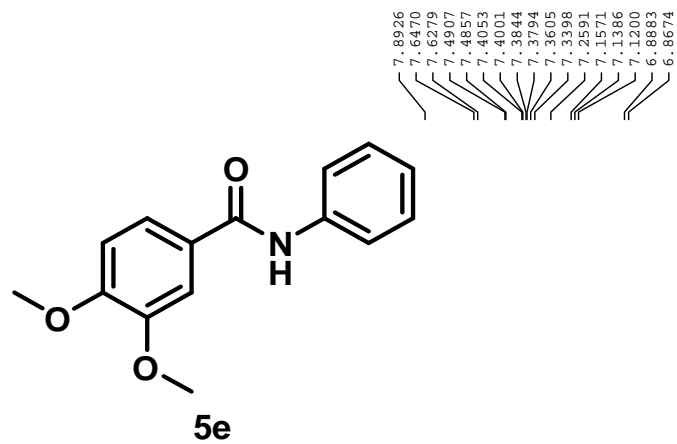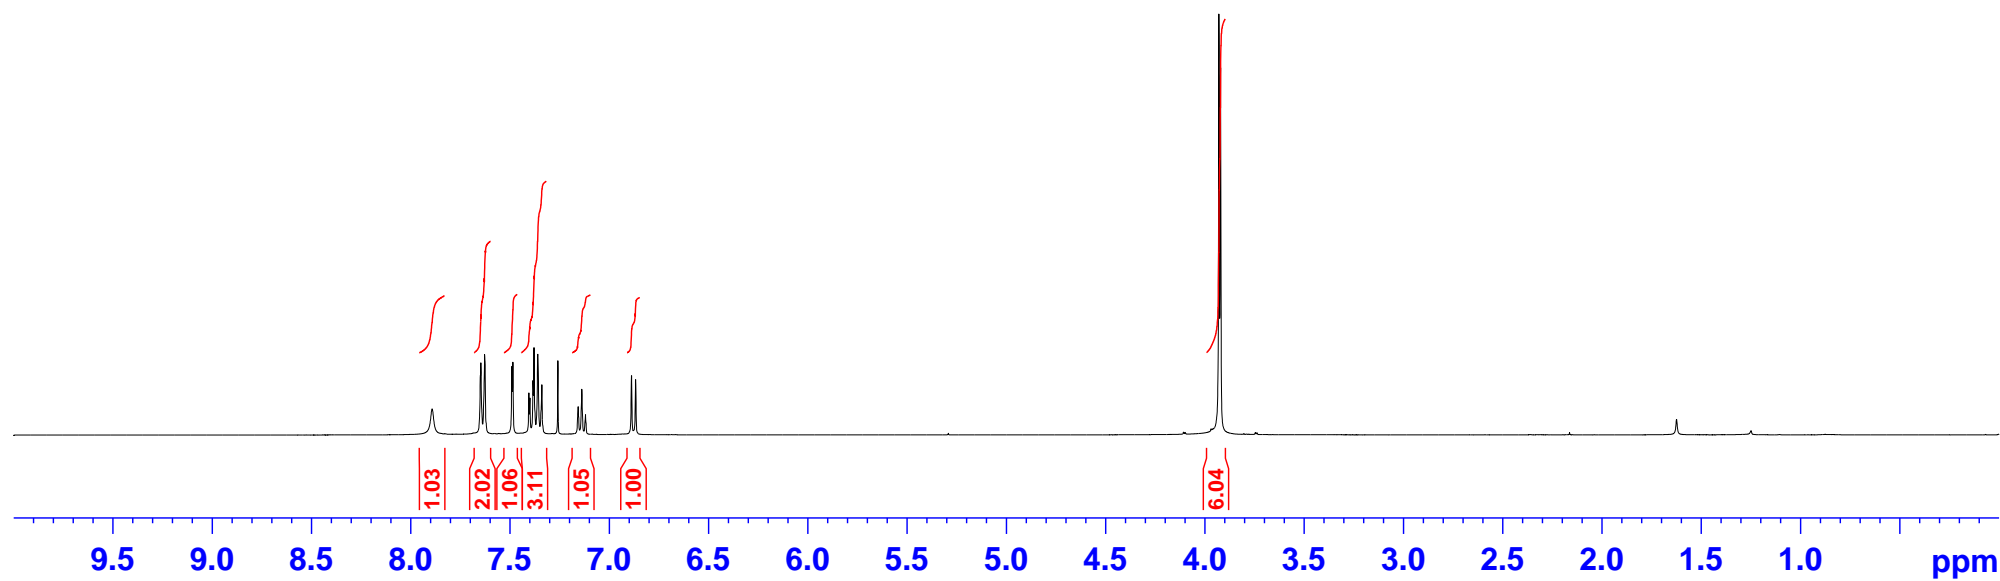



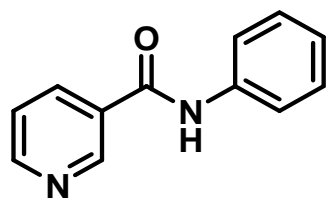

5f

164.1121

152.3411

147.9427

137.5602

135.4999

130.8961

129.1543

125.0742

123.7096

120.6153

77.3874  
77.0696  
76.7520

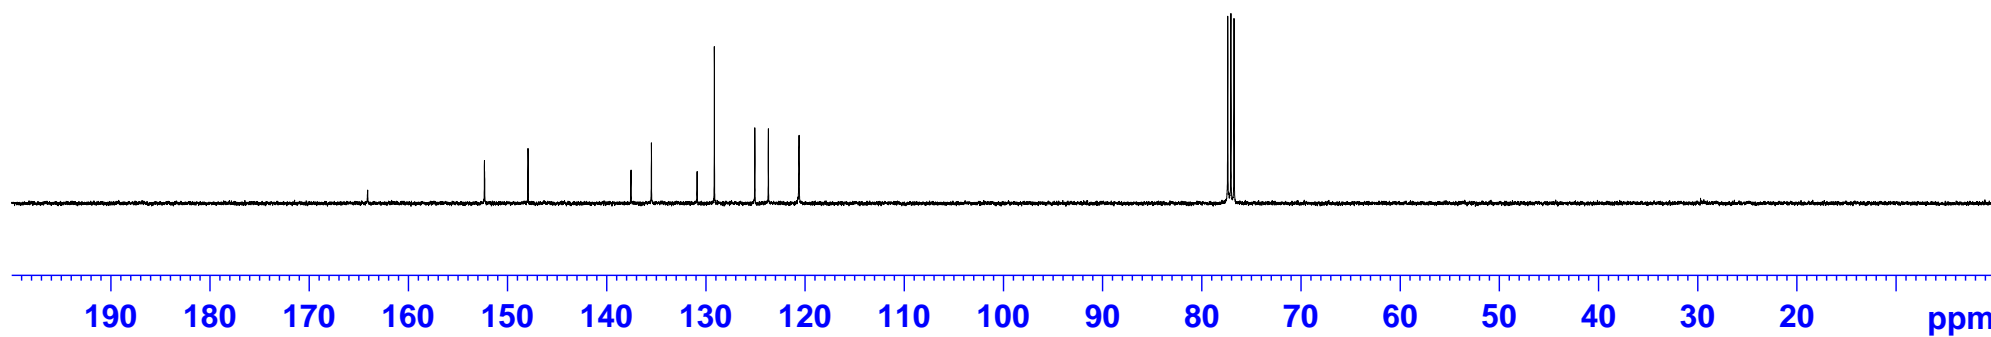

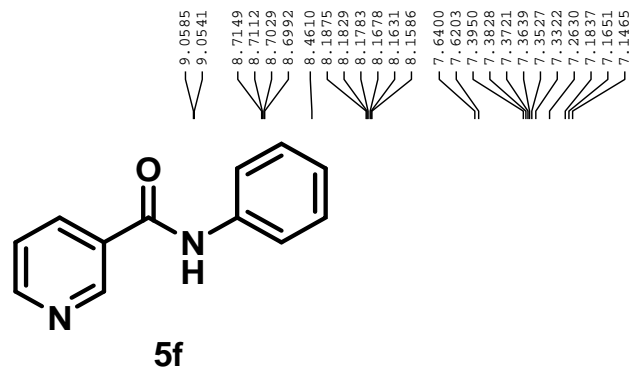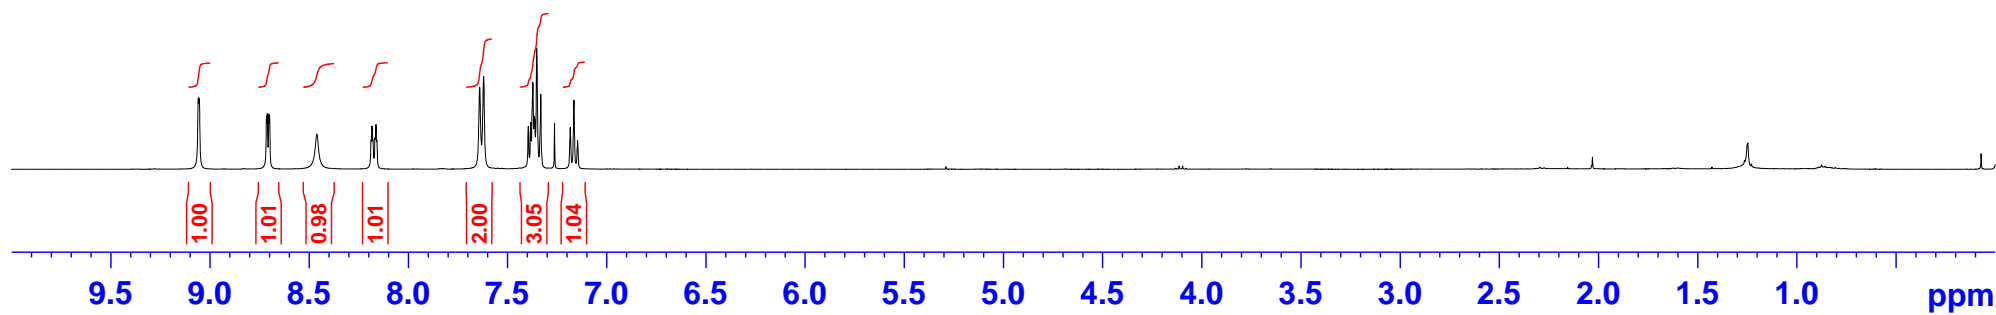

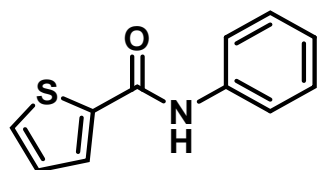

5g

159.9836

139.3013  
137.6096

130.7921  
129.1156  
128.4746  
127.8369

124.6305

120.2533

77.3650  
77.0475  
76.7298

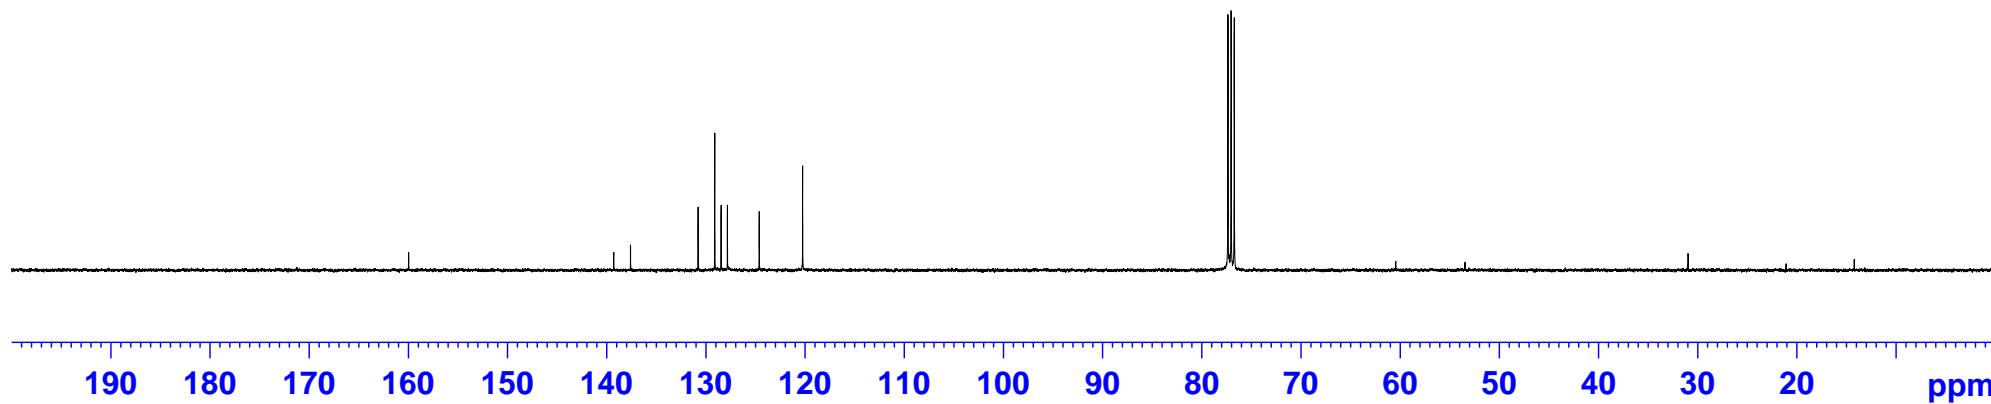

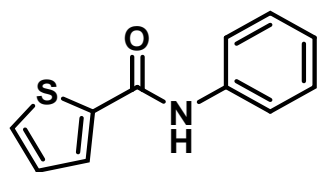

5g

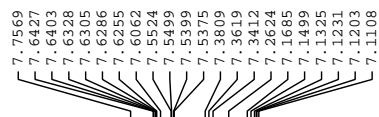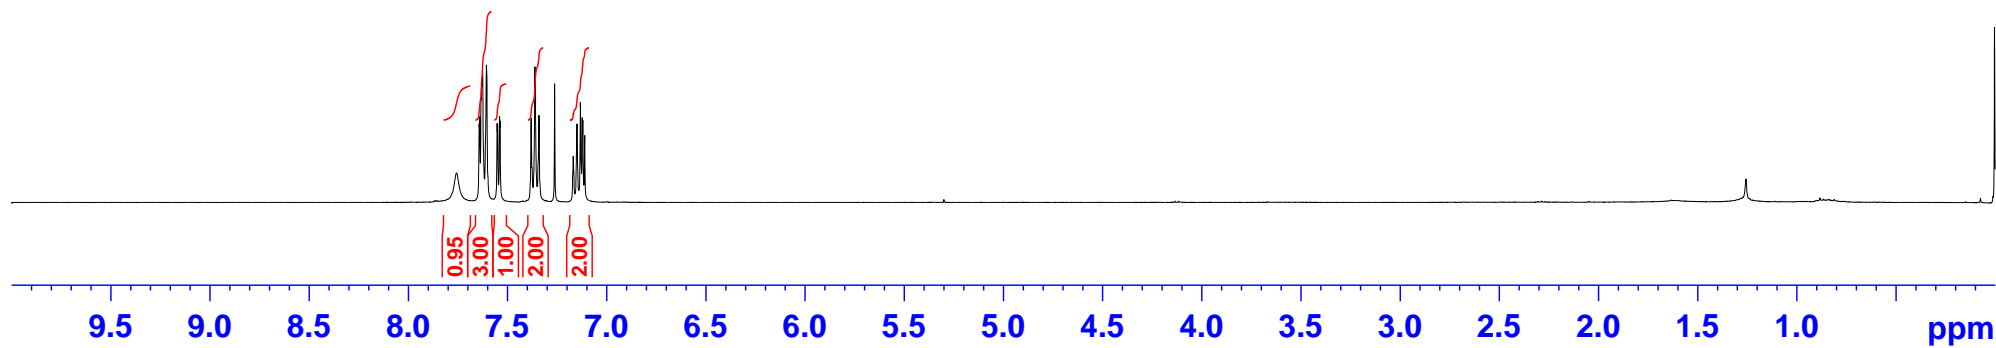

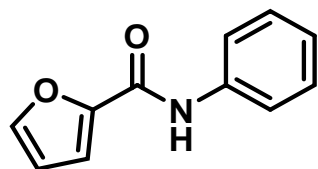

5h

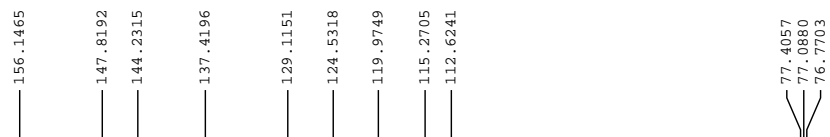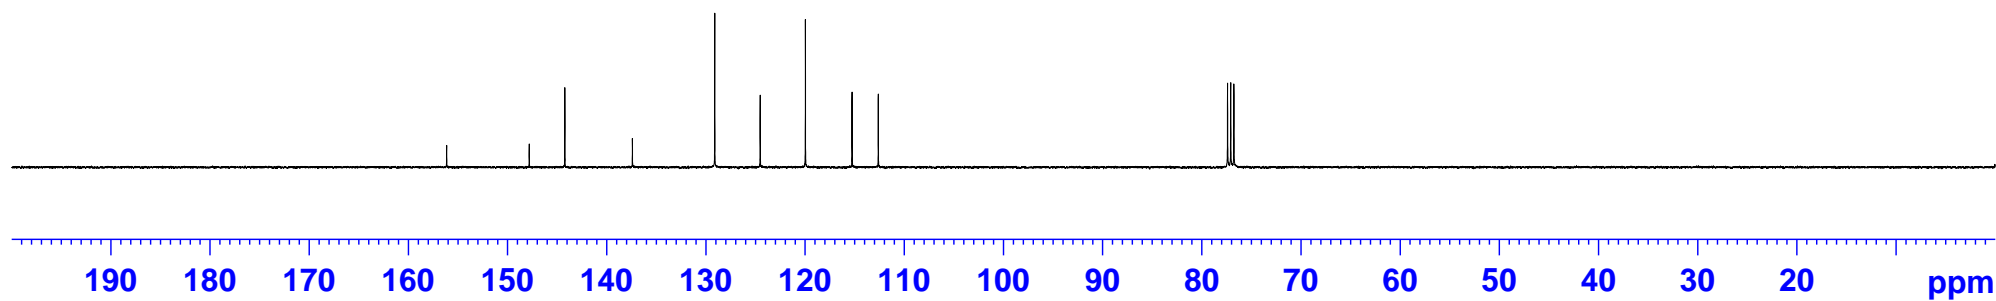

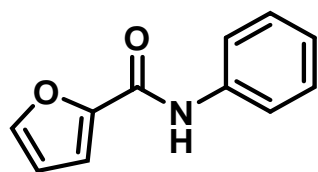

5h

8.1594  
7.6729  
7.6537  
7.4943  
7.4920  
7.3771  
7.3581  
7.3375  
7.2630  
7.2325  
7.2241  
7.1595  
7.1410  
7.1224  
6.5499  
6.5456  
6.5412  
6.5369

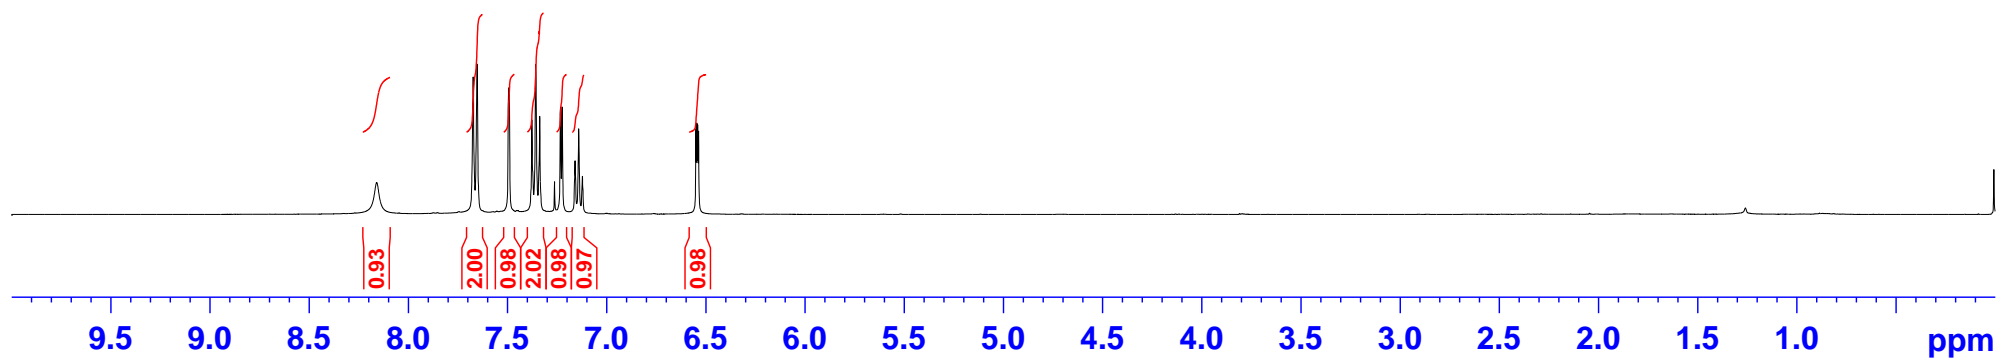

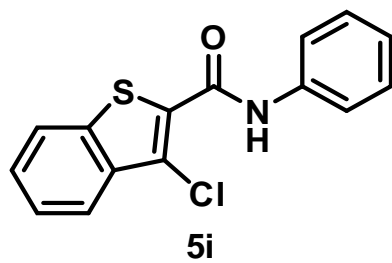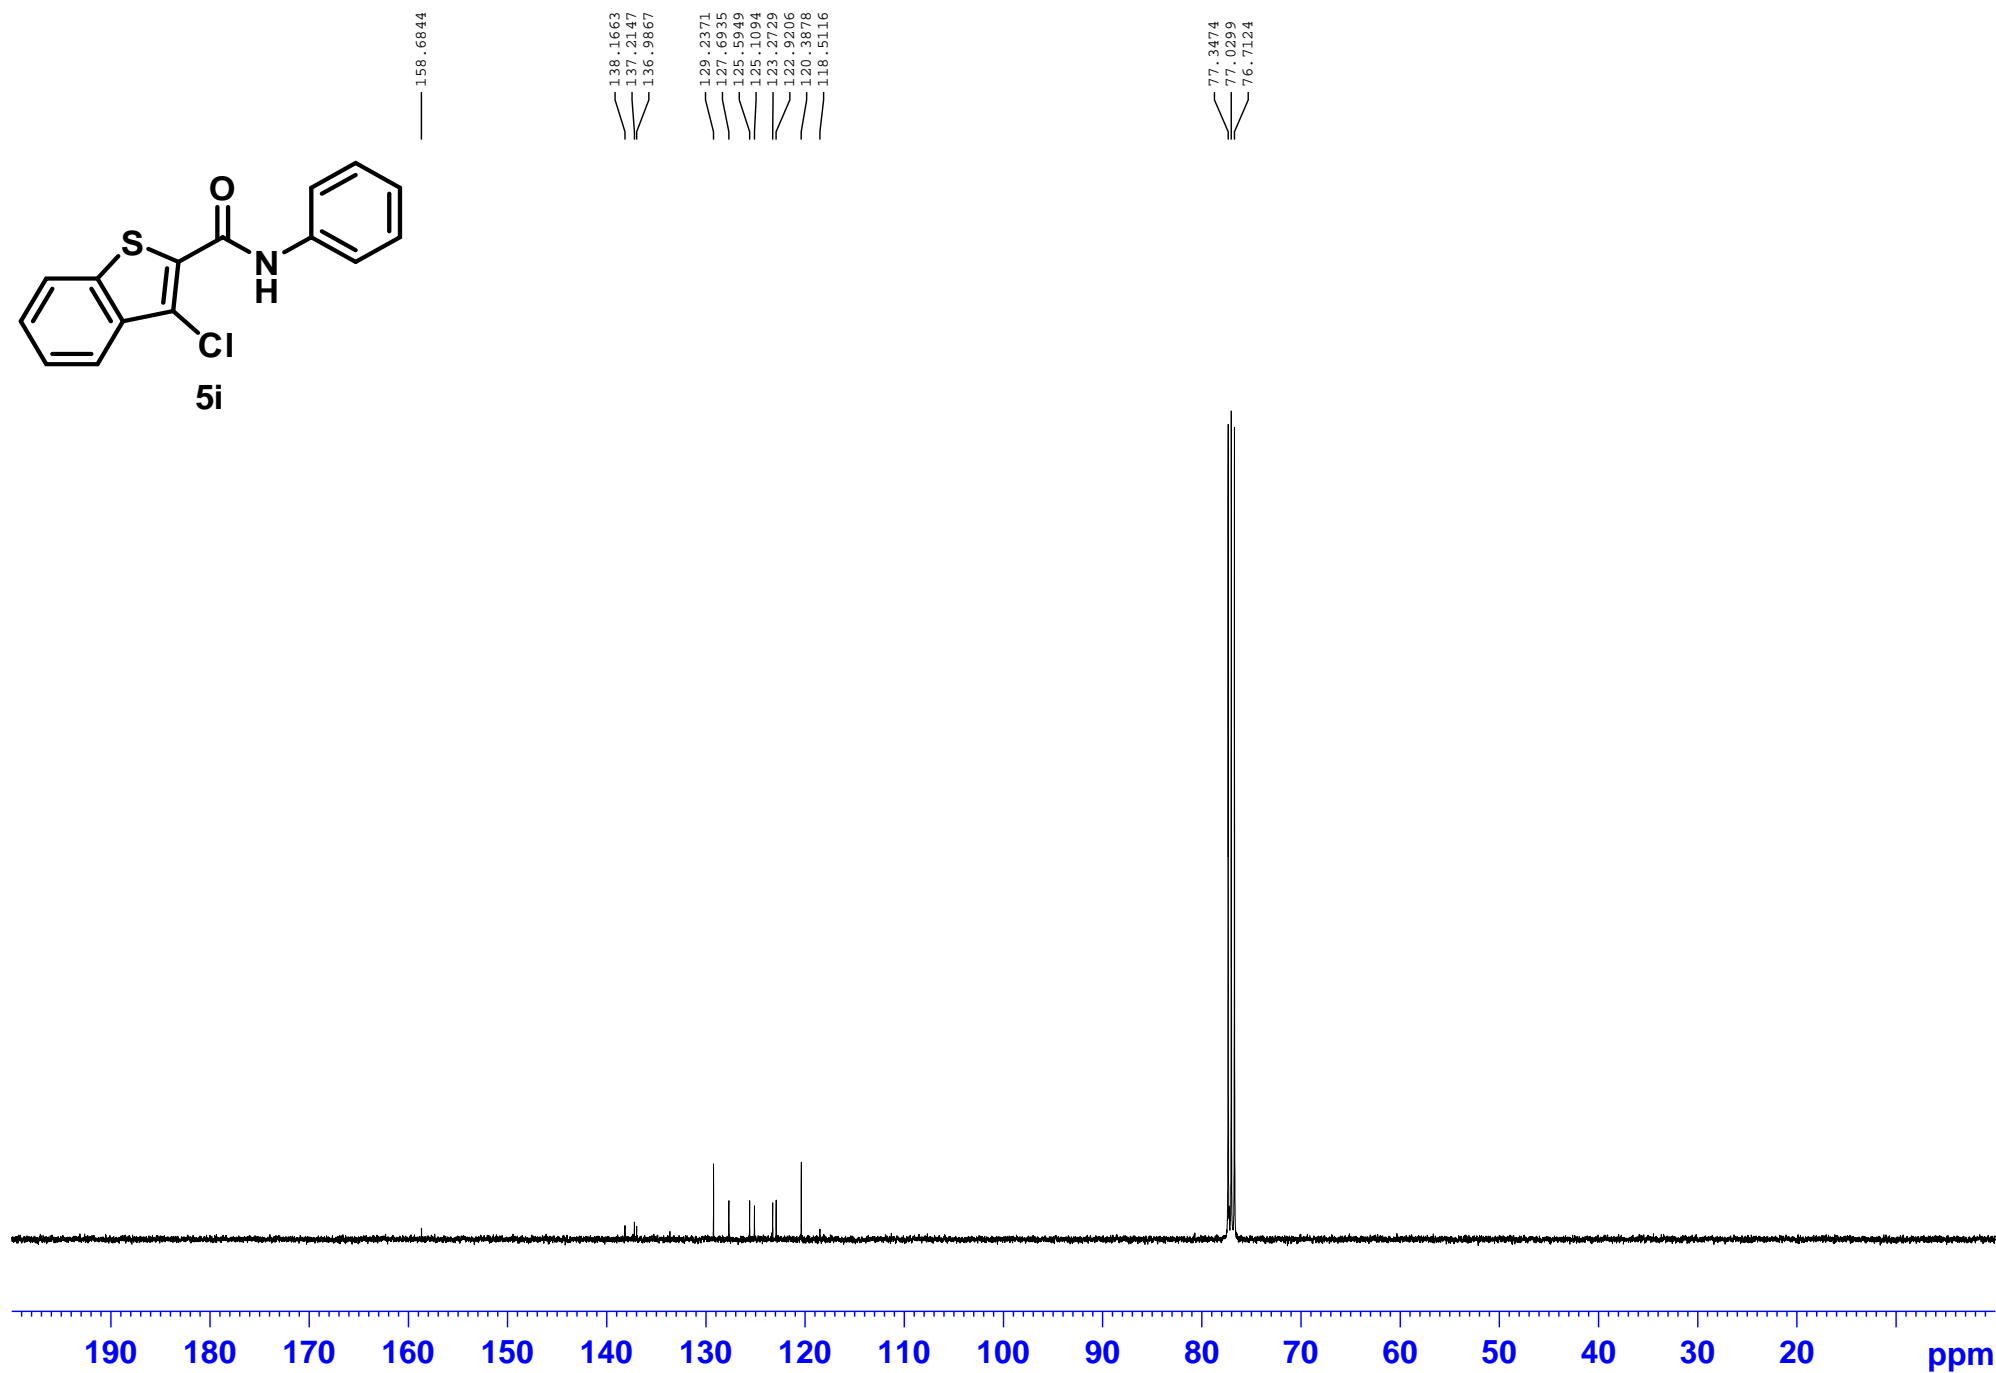

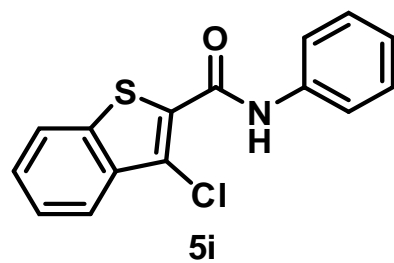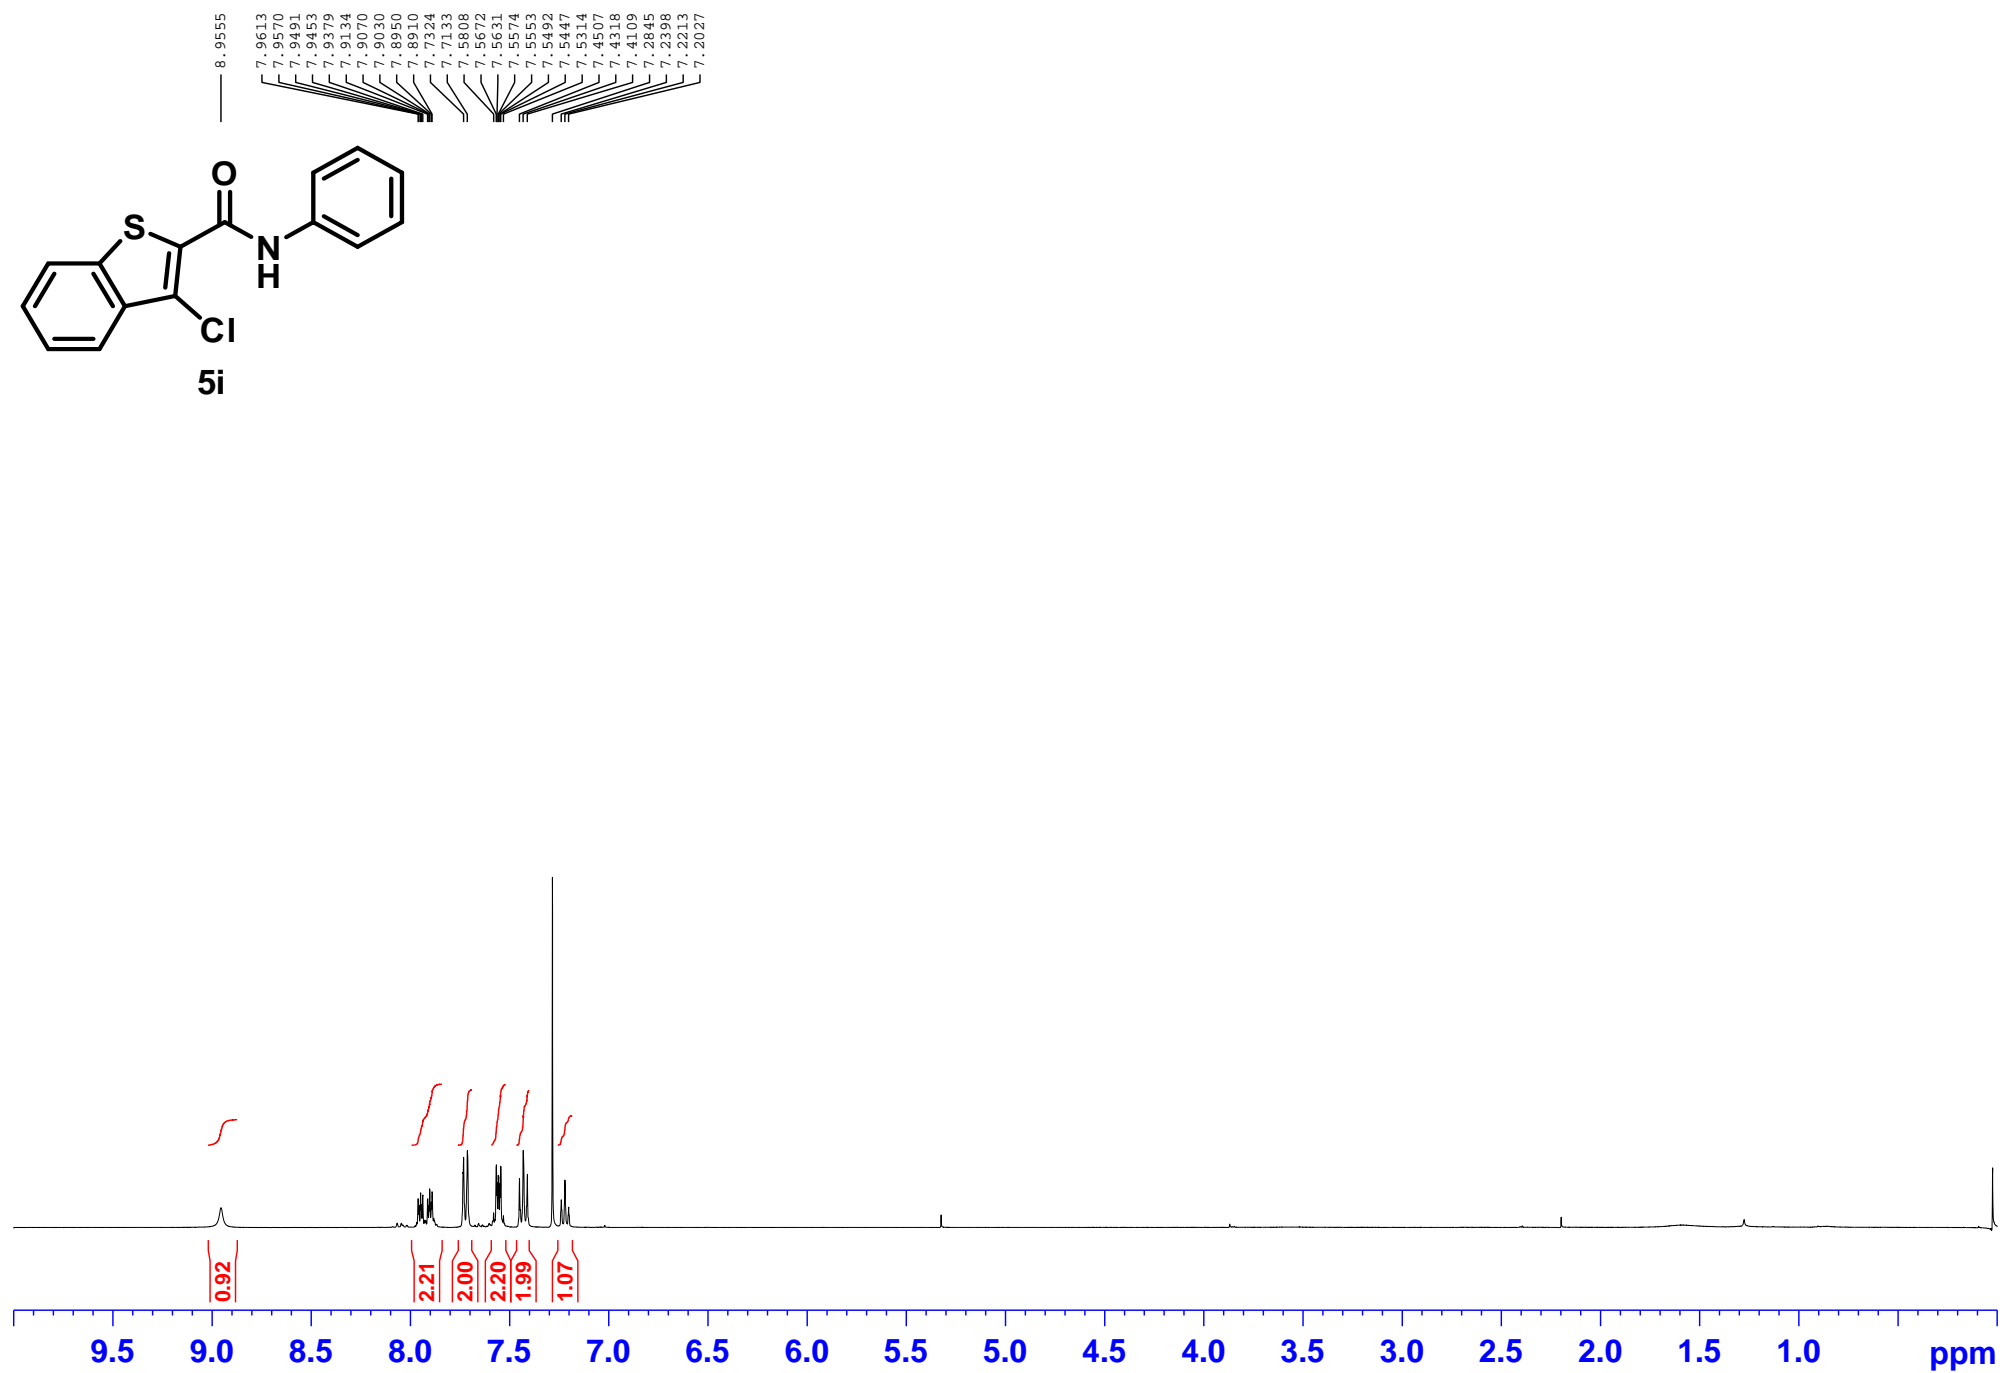



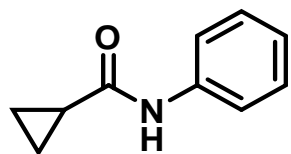

5j

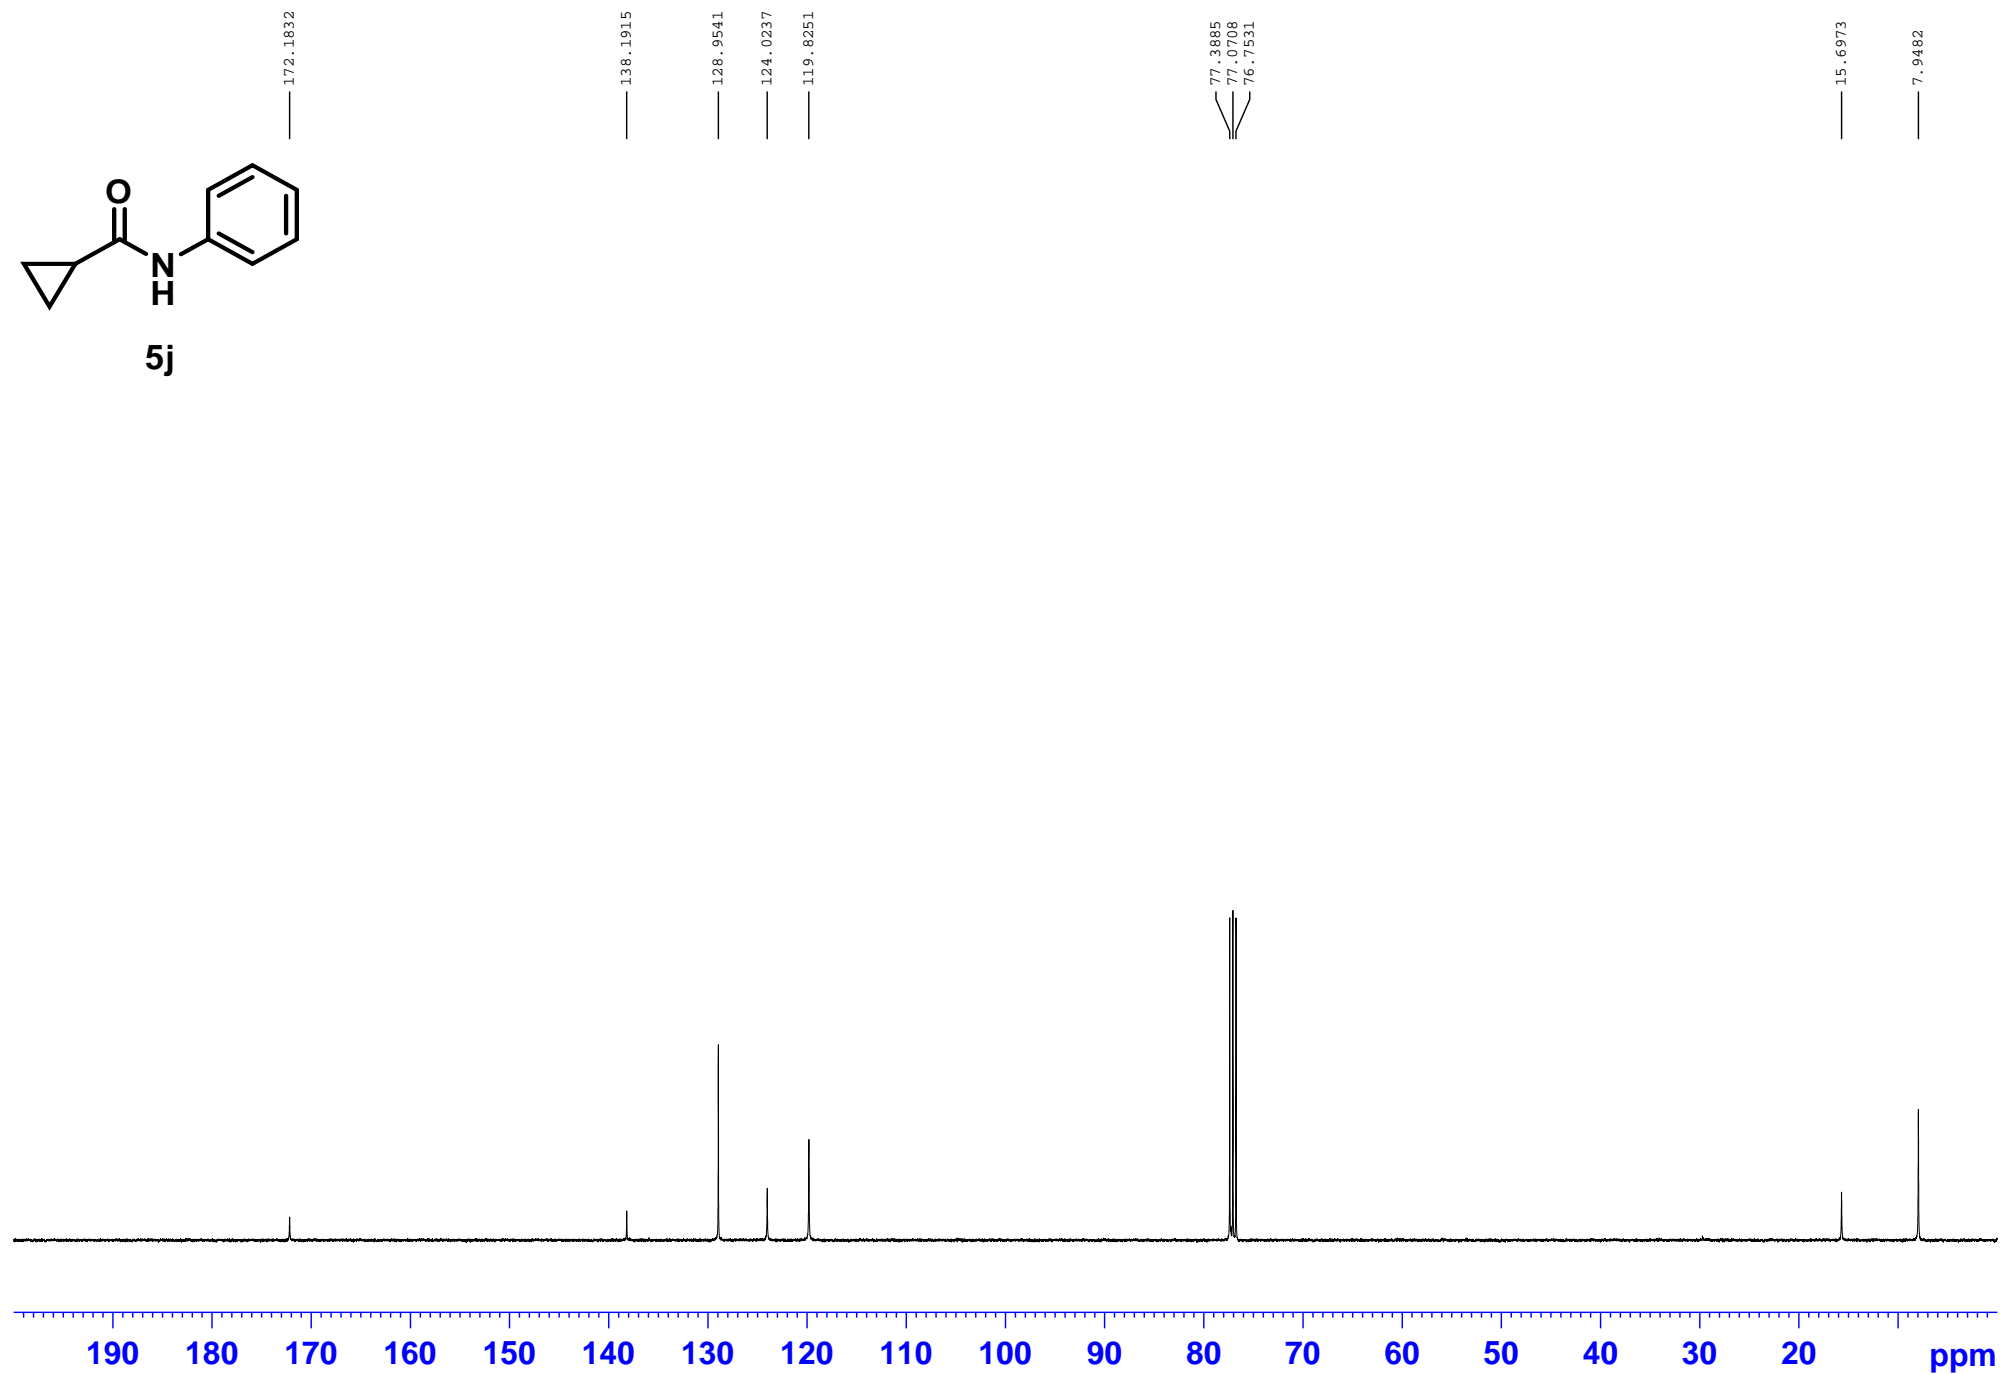

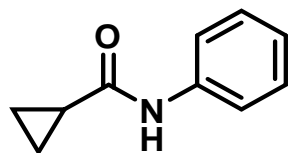

5j

7.7692  
7.5208  
7.5013  
7.3107  
7.2915  
7.2717  
7.2624  
7.0972  
7.0791  
7.0610

1.5333  
1.5236  
1.5135  
1.5053  
1.4940  
1.0905  
1.0800  
1.0724  
1.0695  
1.0619  
1.0523  
0.8385  
0.8291  
0.8213  
0.8096  
0.8019  
0.7916

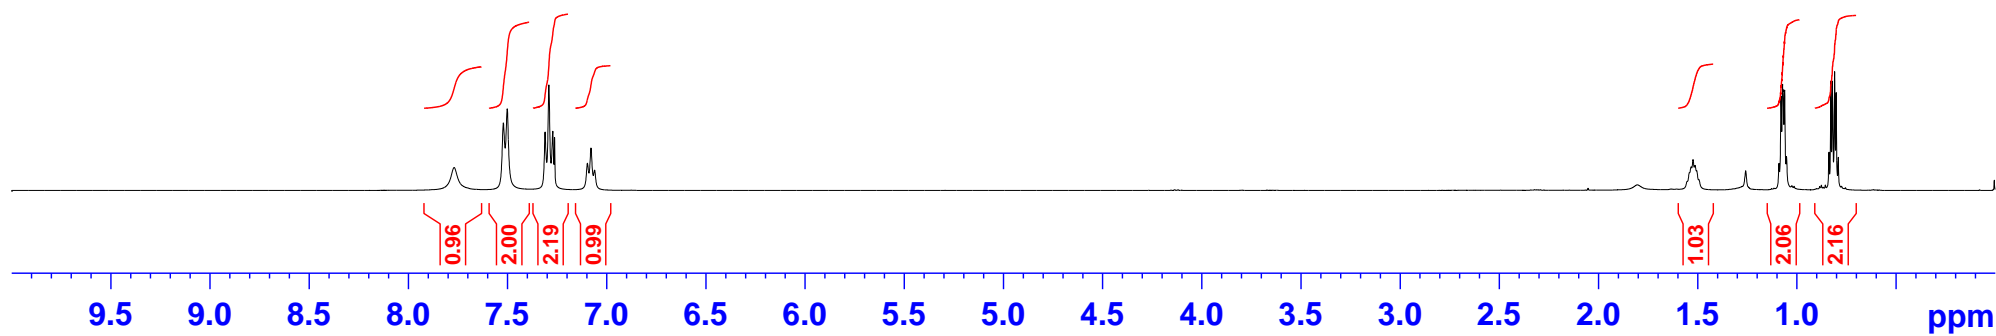

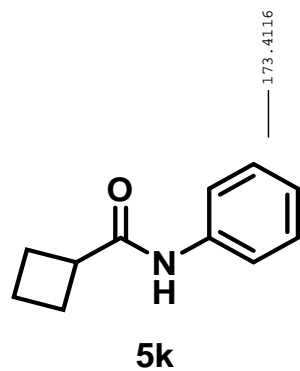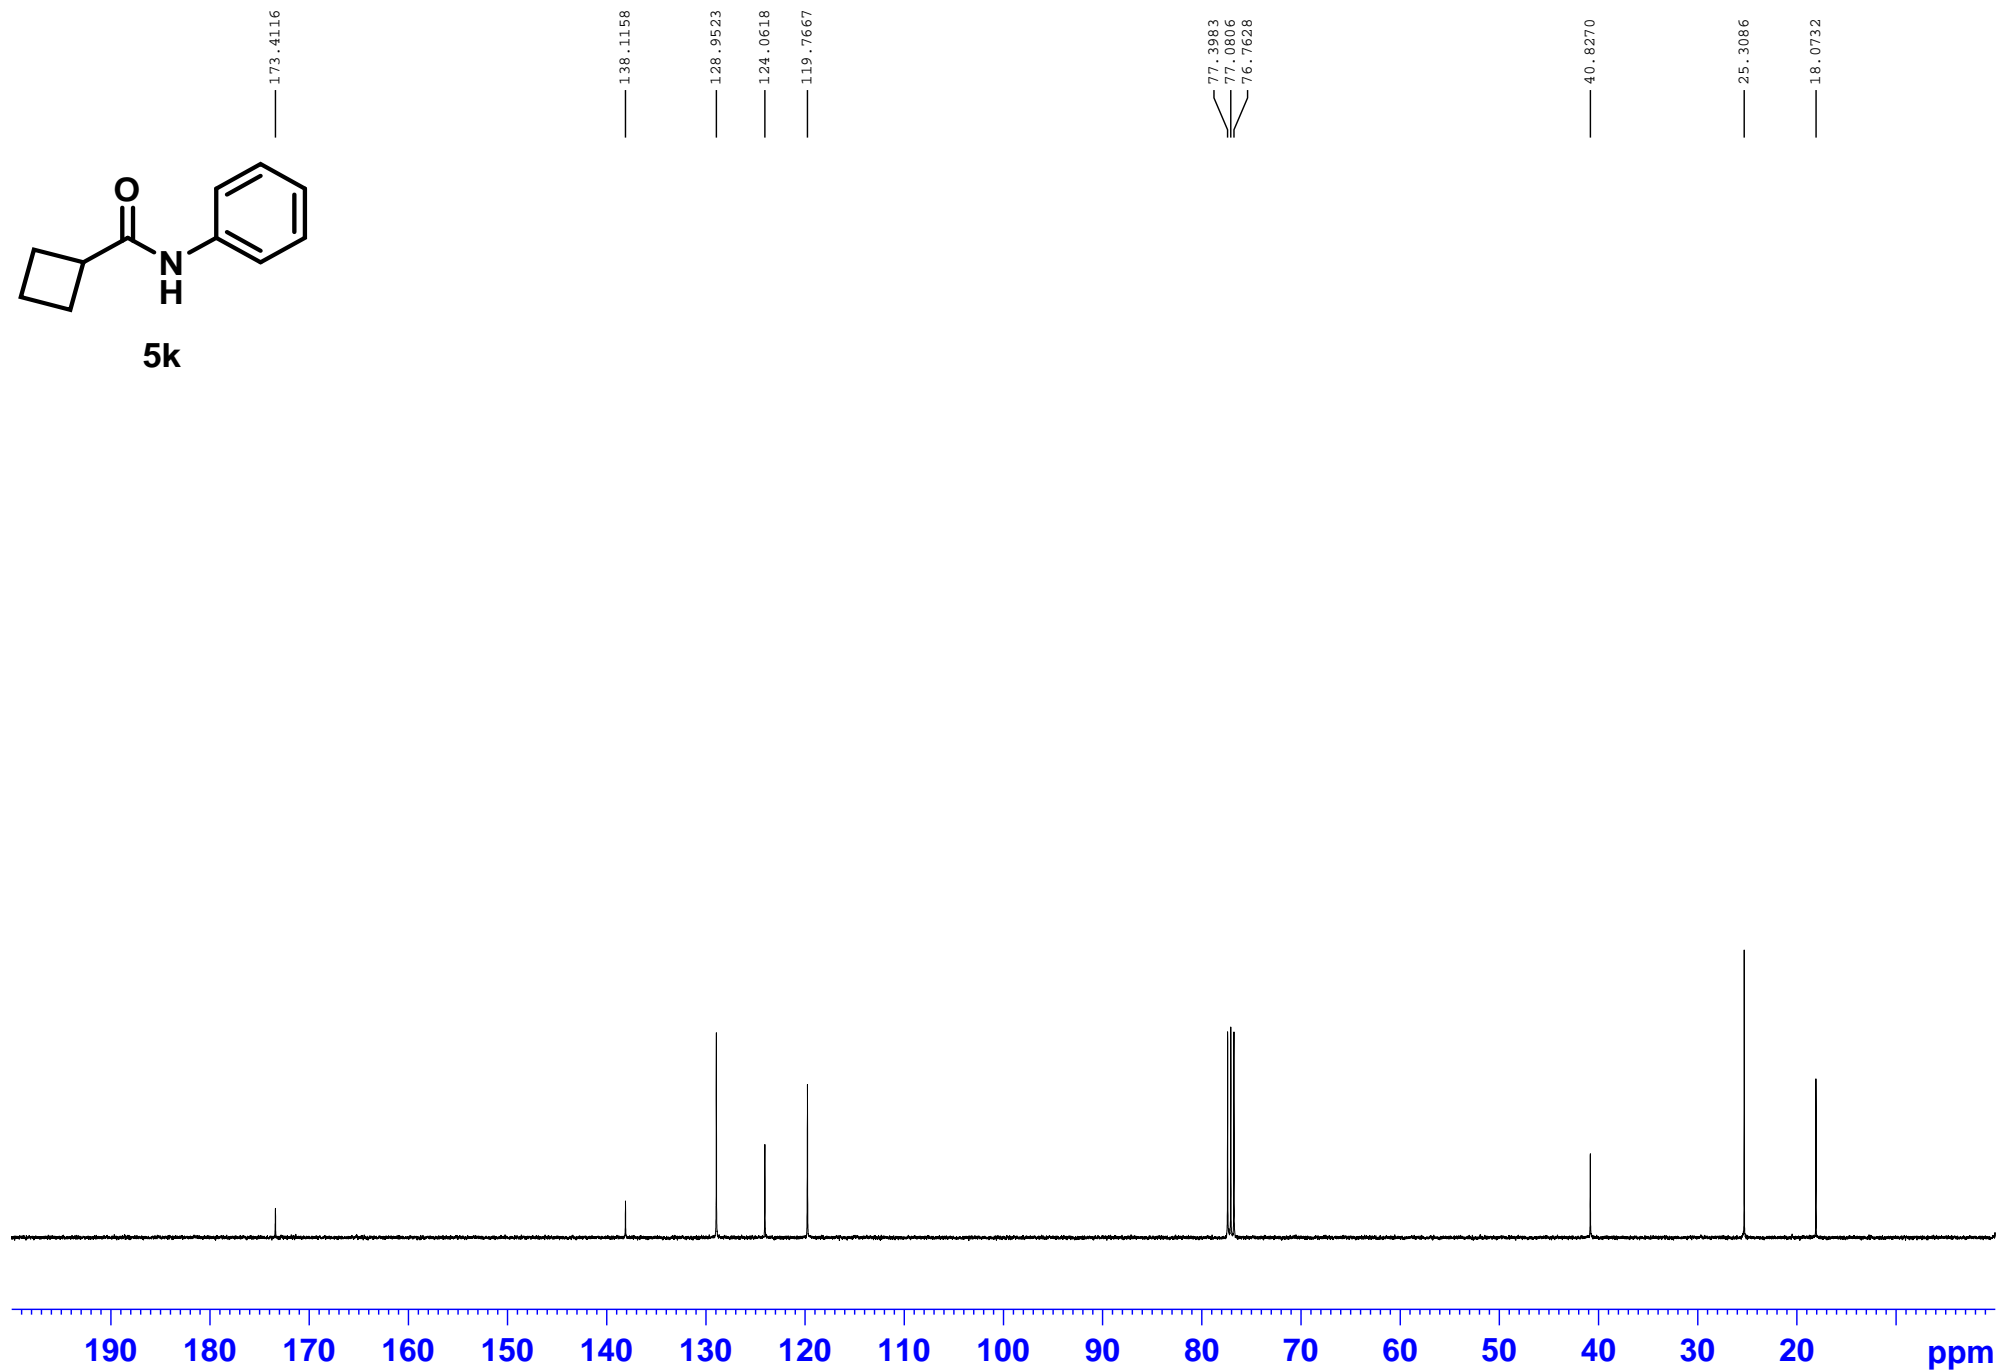

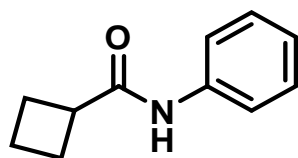

5k

7.5515  
7.5317  
7.3673  
7.3172  
7.2979  
7.2779  
7.2624  
7.1010  
7.0826  
7.0641

3.2091  
3.1880  
3.1667  
3.1454  
3.1242  
2.4384  
2.4328  
2.4152  
2.4051  
2.3919  
2.3855  
2.3691  
2.3634  
2.3468  
2.3407  
2.2431  
2.2351  
2.2214  
2.2134  
2.2007  
2.1915  
2.1696  
2.1620  
2.0449  
2.0219  
2.0179  
1.9952  
1.9729  
1.9509  
1.9348  
1.9272  
1.9208  
1.9115  
1.9028  
1.8861  
1.8614  
1.8527

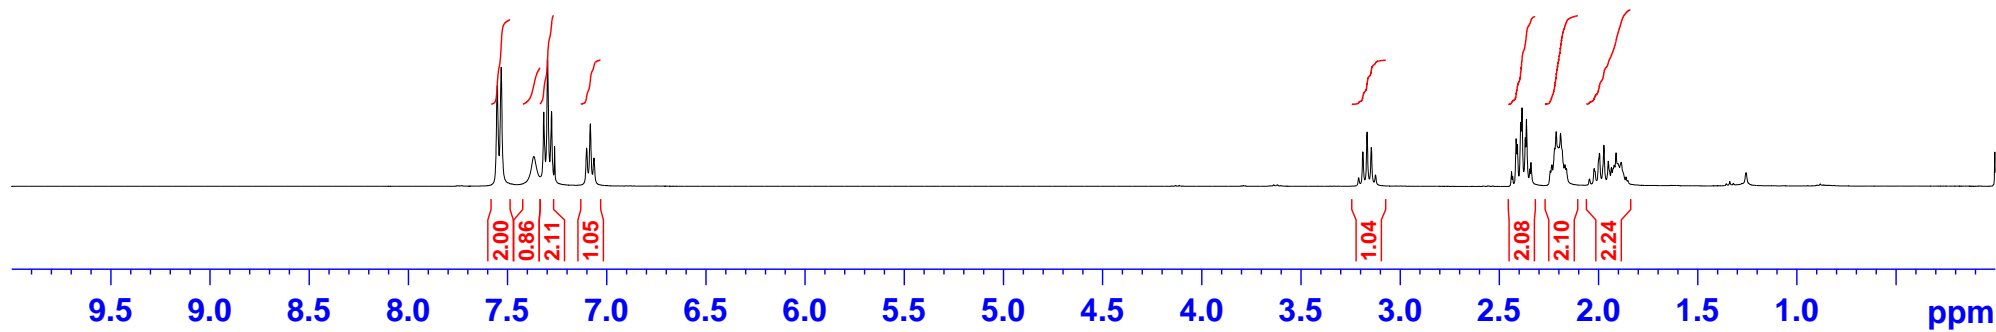

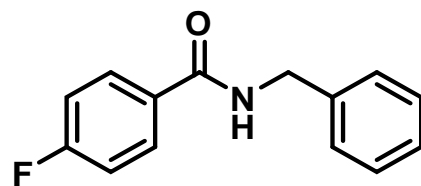

6a

166.3061  
166.0154  
163.5115

138.0475  
130.5565  
130.5250  
129.3524  
129.2637  
128.8425  
127.9525  
127.7230

115.7515  
115.5342

77.3603  
77.0427  
76.7251

44.2264

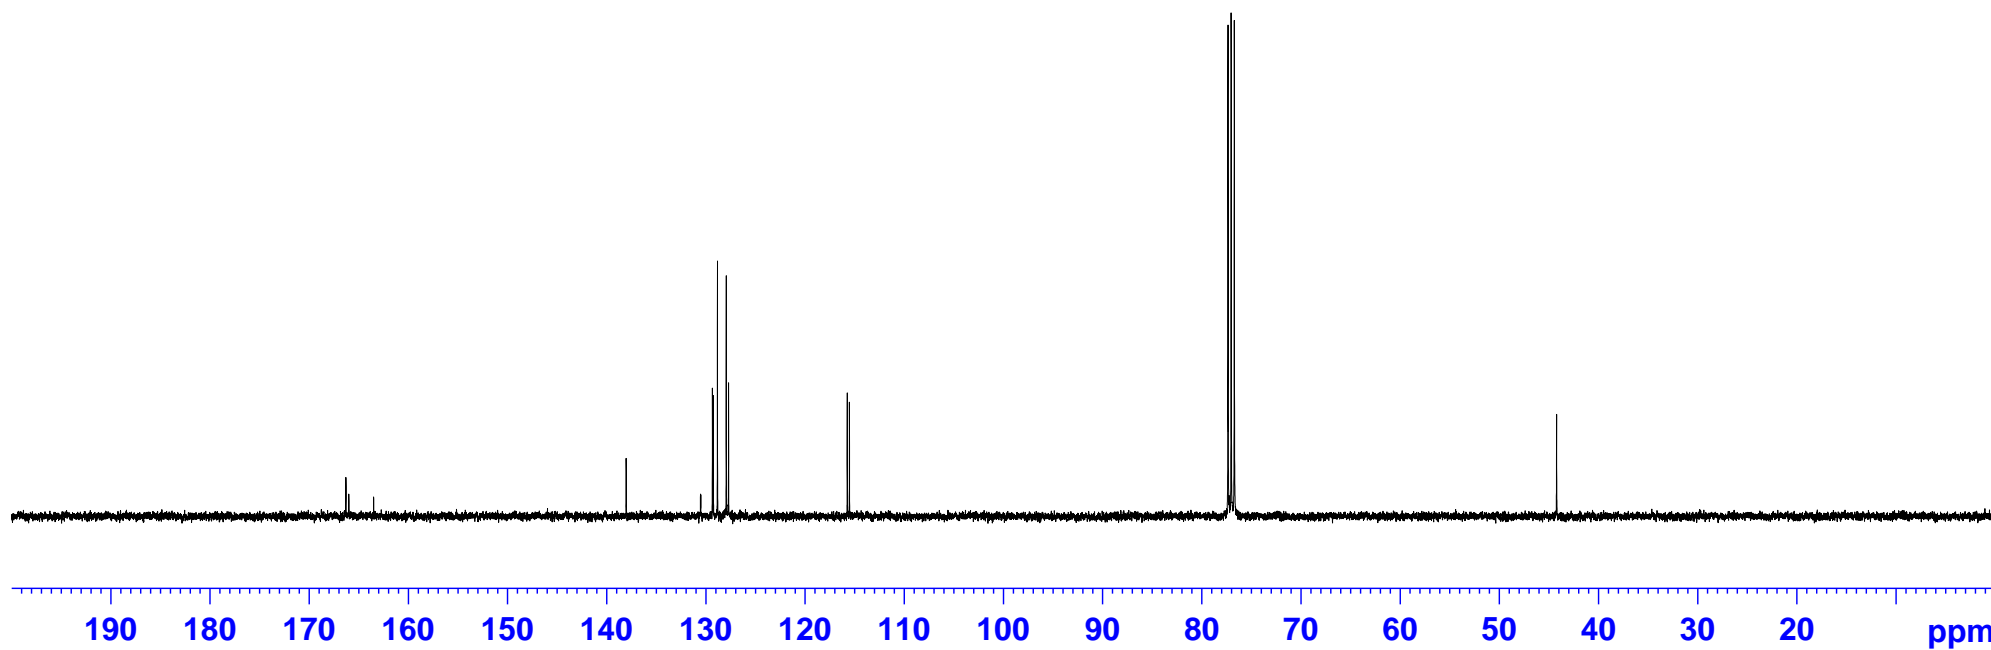

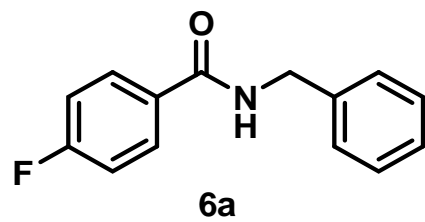

— -108.08

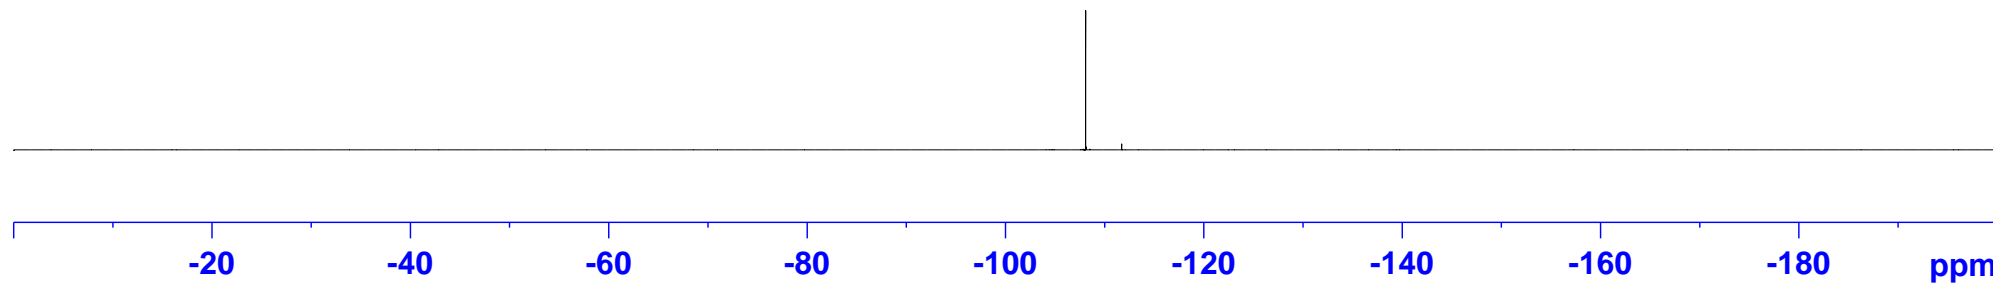

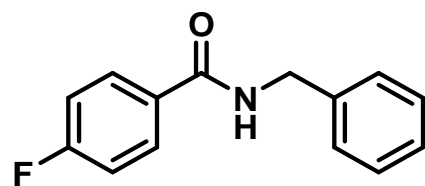

6a

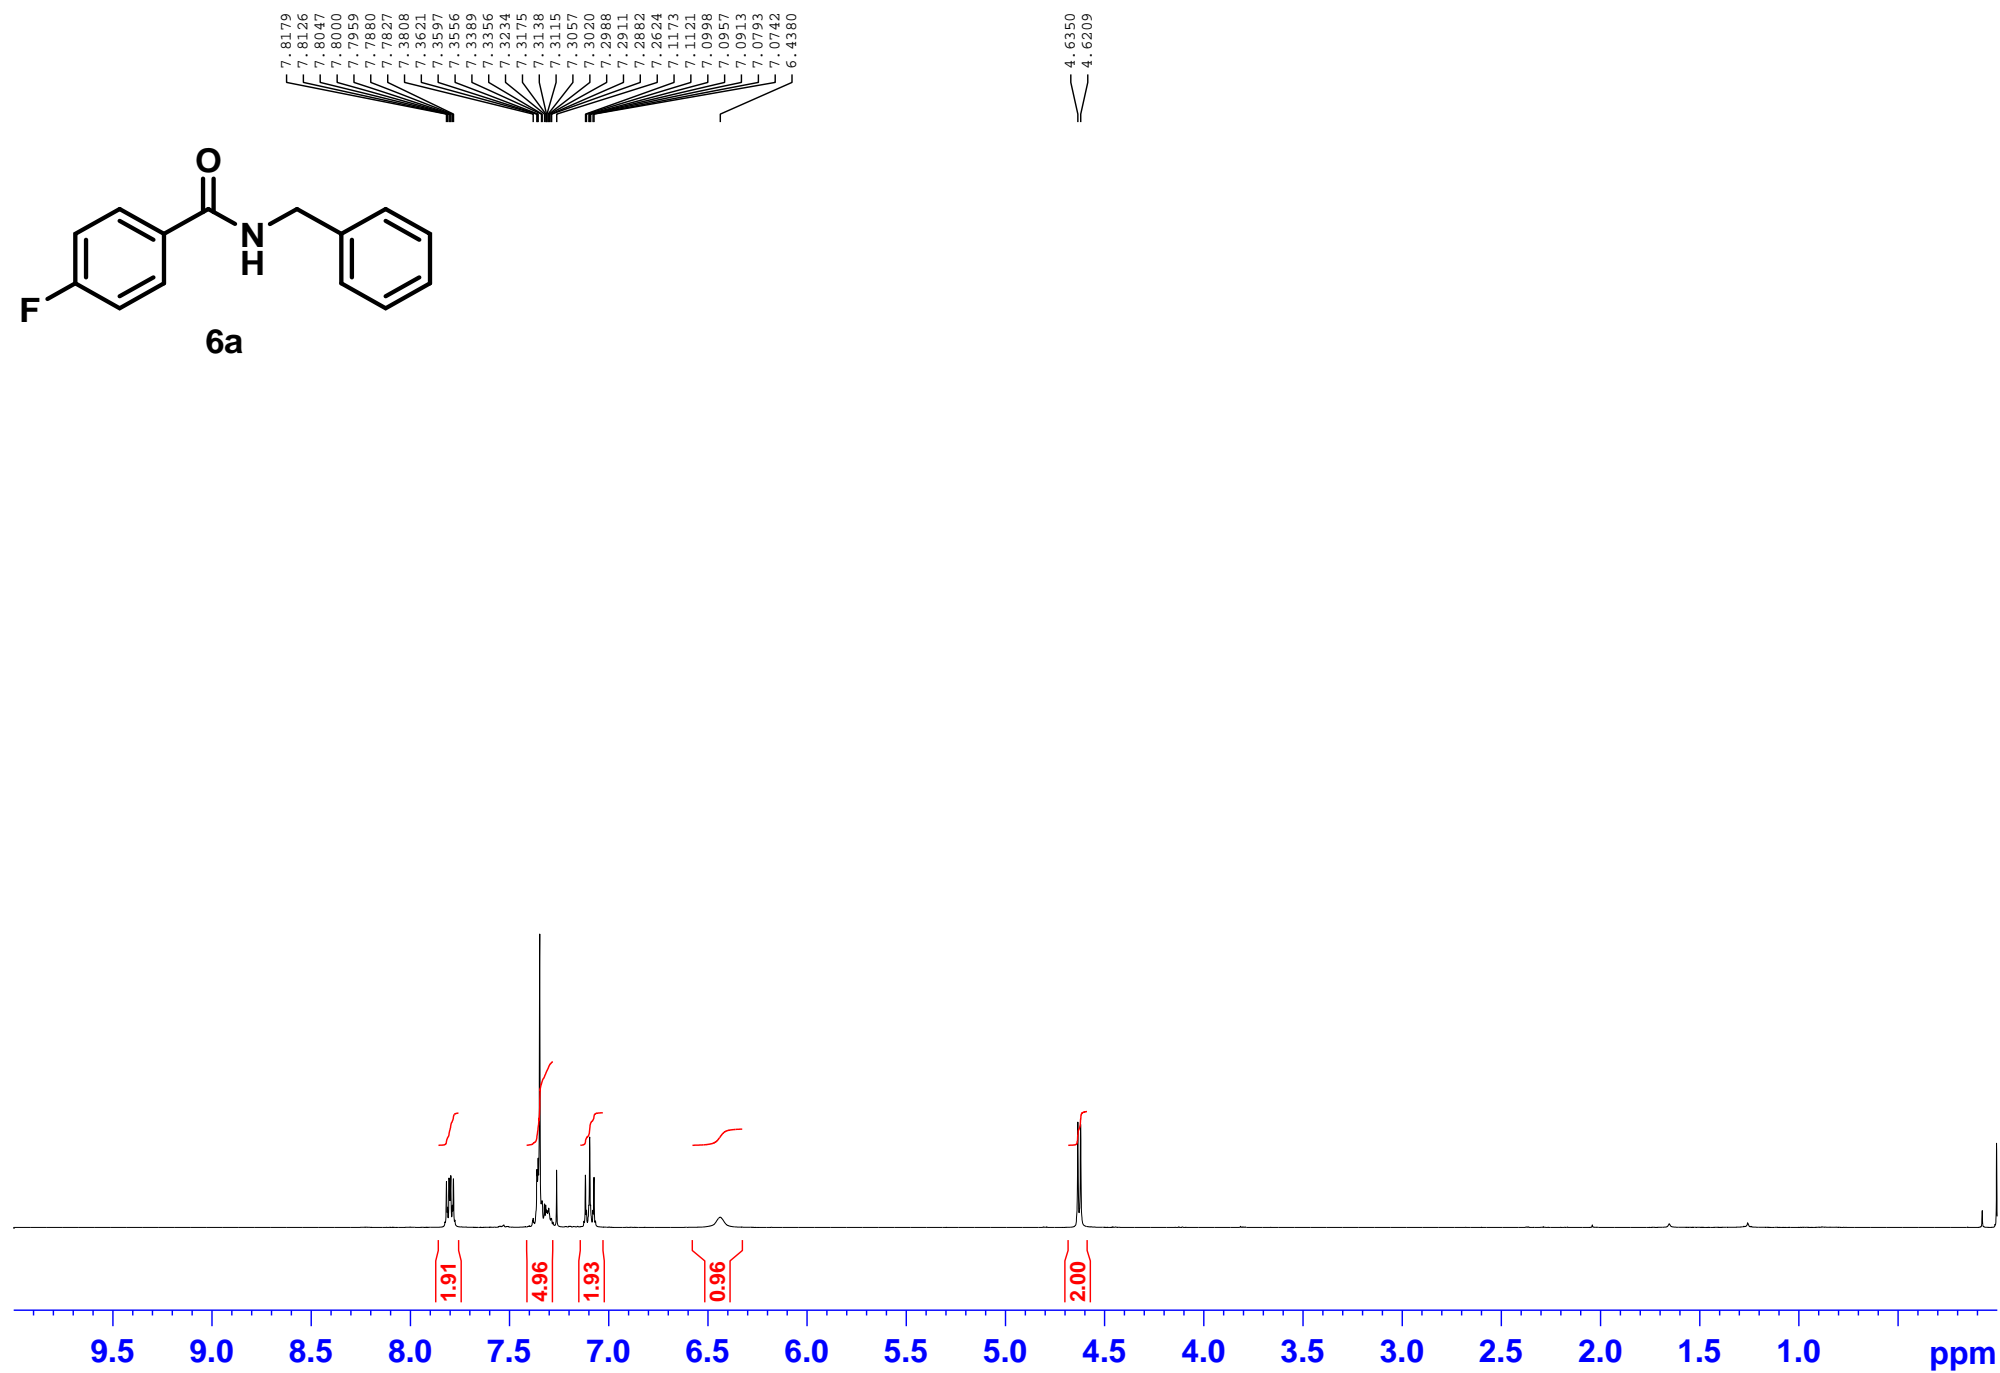

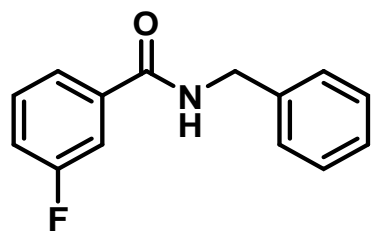

**6b**

166.2581  
166.2337  
163.9577  
161.4966

137.9733  
136.6720  
136.6042  
130.2573  
130.1790  
128.7842  
127.8550  
127.6510  
122.5368  
122.5066  
118.6258  
118.4145  
114.5960  
114.3688

44.1575

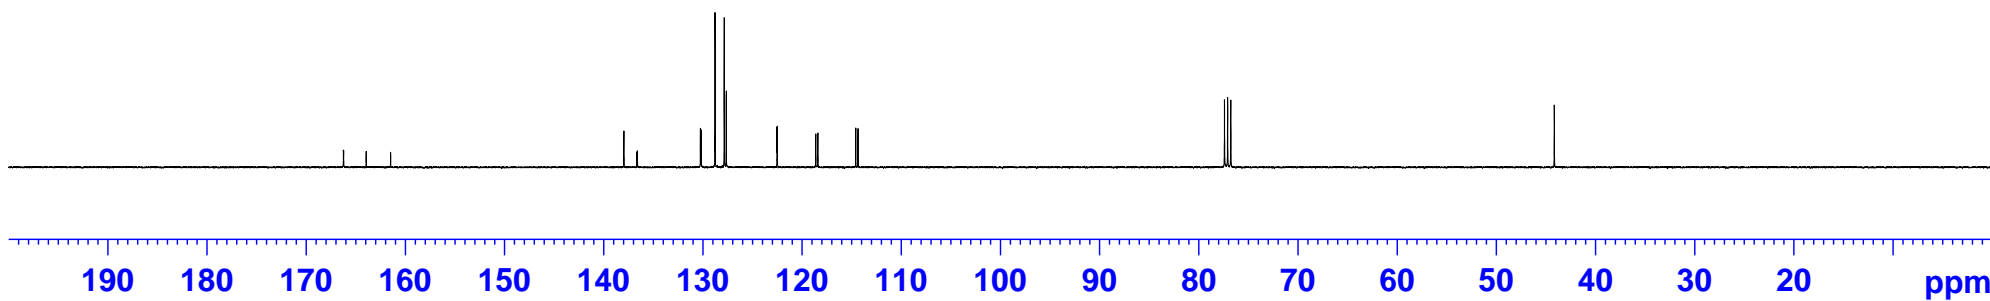



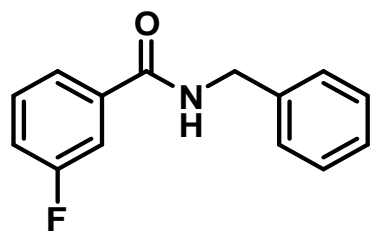

**6b**

166.2581  
166.2337  
163.9577  
161.4966

137.9733  
136.6720  
136.6042  
130.2573  
130.1790  
128.7842  
127.8550  
127.6510  
122.5368  
122.5066  
118.6258  
118.4145  
114.5960  
114.3688

77.4132  
77.0954  
76.7776

44.1575

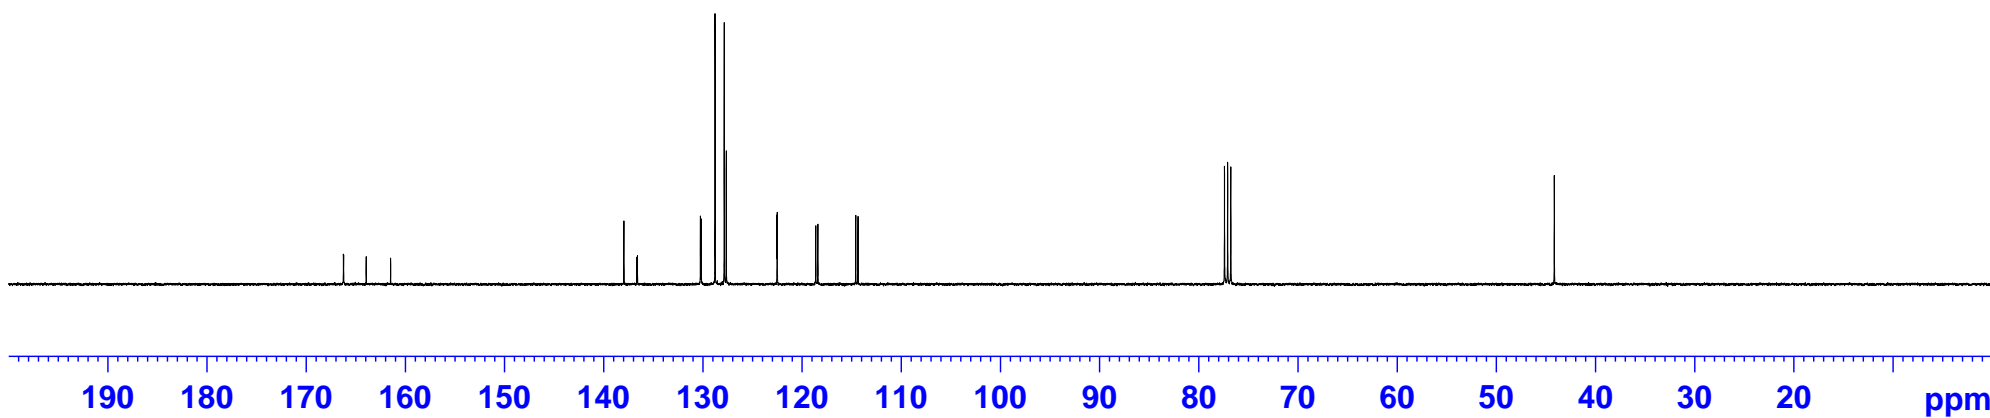

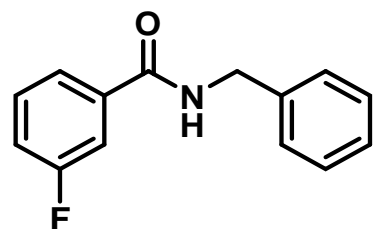

6b

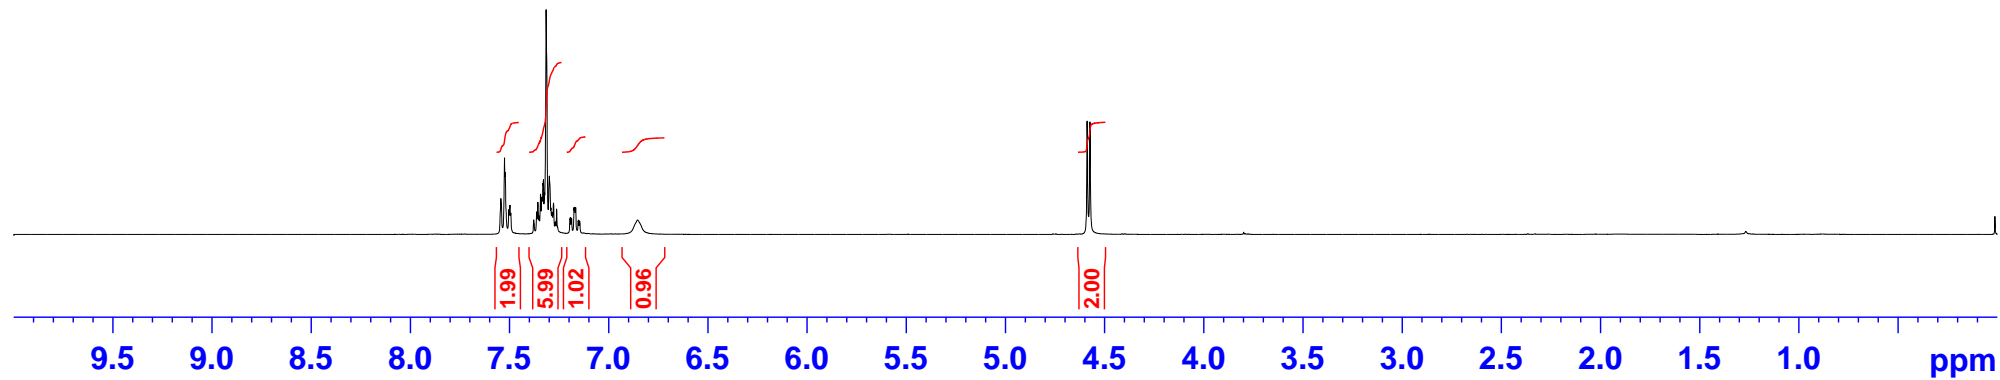

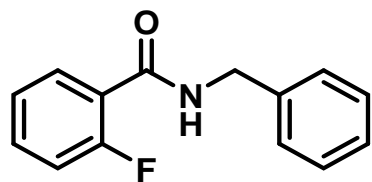

**6c**

163.3770  
163.3464  
161.8390  
159.3803

138.0862  
133.3843  
133.2919  
132.0775  
132.0561  
128.7599  
127.7316  
127.5420  
124.8393  
124.8069  
121.1347  
121.0192  
116.1519  
115.9069

77.5087  
77.1903  
76.8720

44.0308

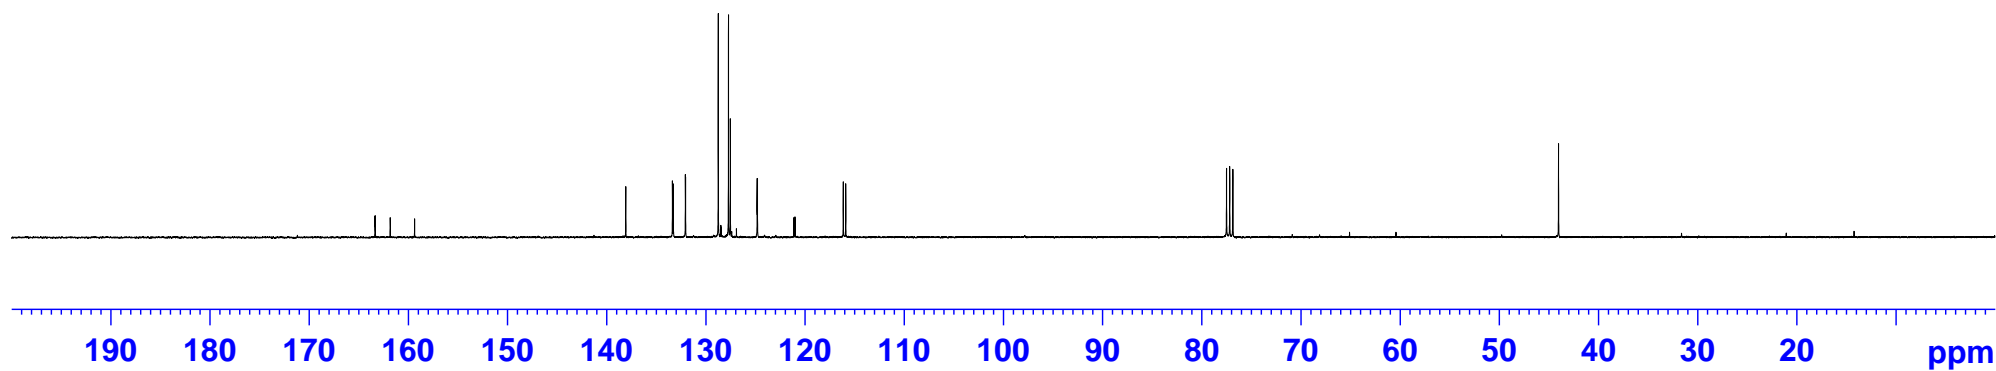

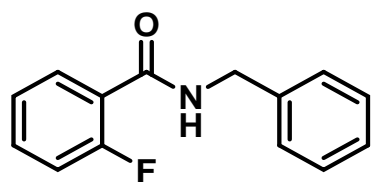

6c

— -113.36



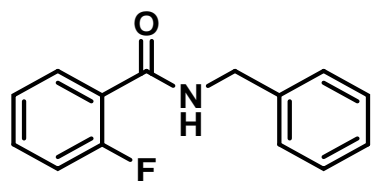

6c

8.1147  
8.1109  
8.0951  
8.0913  
8.0754  
8.0716  
7.4683  
7.4534  
7.4347  
7.4205  
7.4166  
7.3537  
7.3455  
7.3412  
7.3262  
7.3208  
7.2999  
7.2926  
7.2860  
7.2837  
7.2787  
7.2711  
7.2575  
7.2382  
7.2194  
7.1527  
7.1359  
7.1103  
7.0893  
7.0802  
7.0592

4.6697  
4.6555

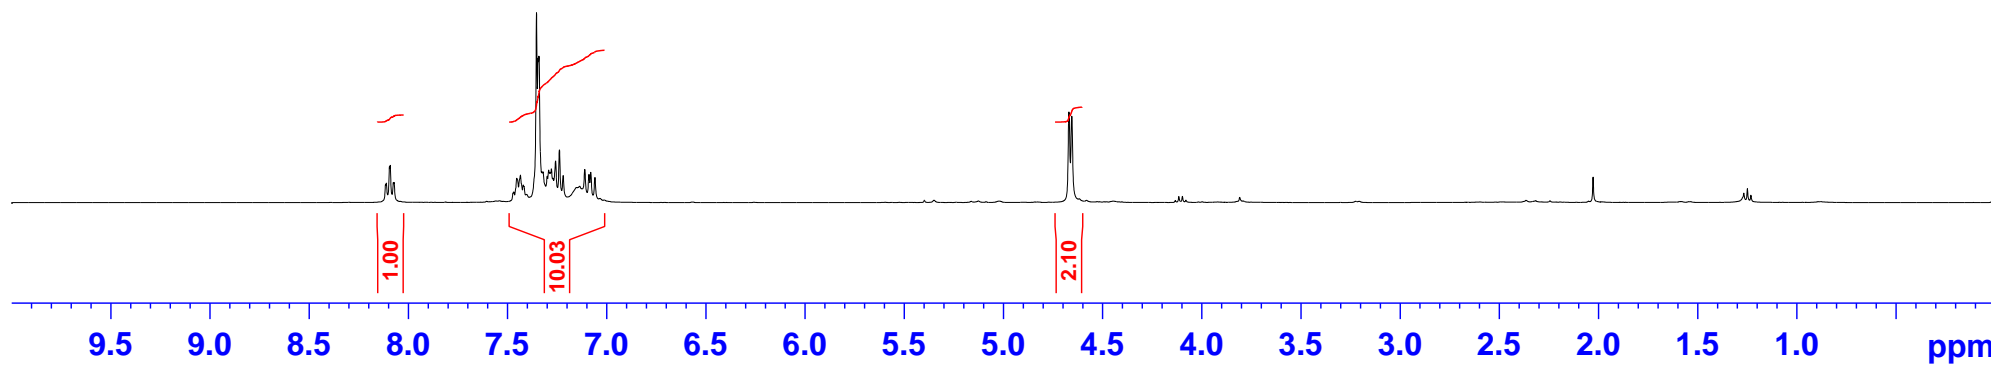

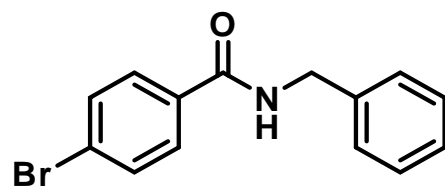

6d

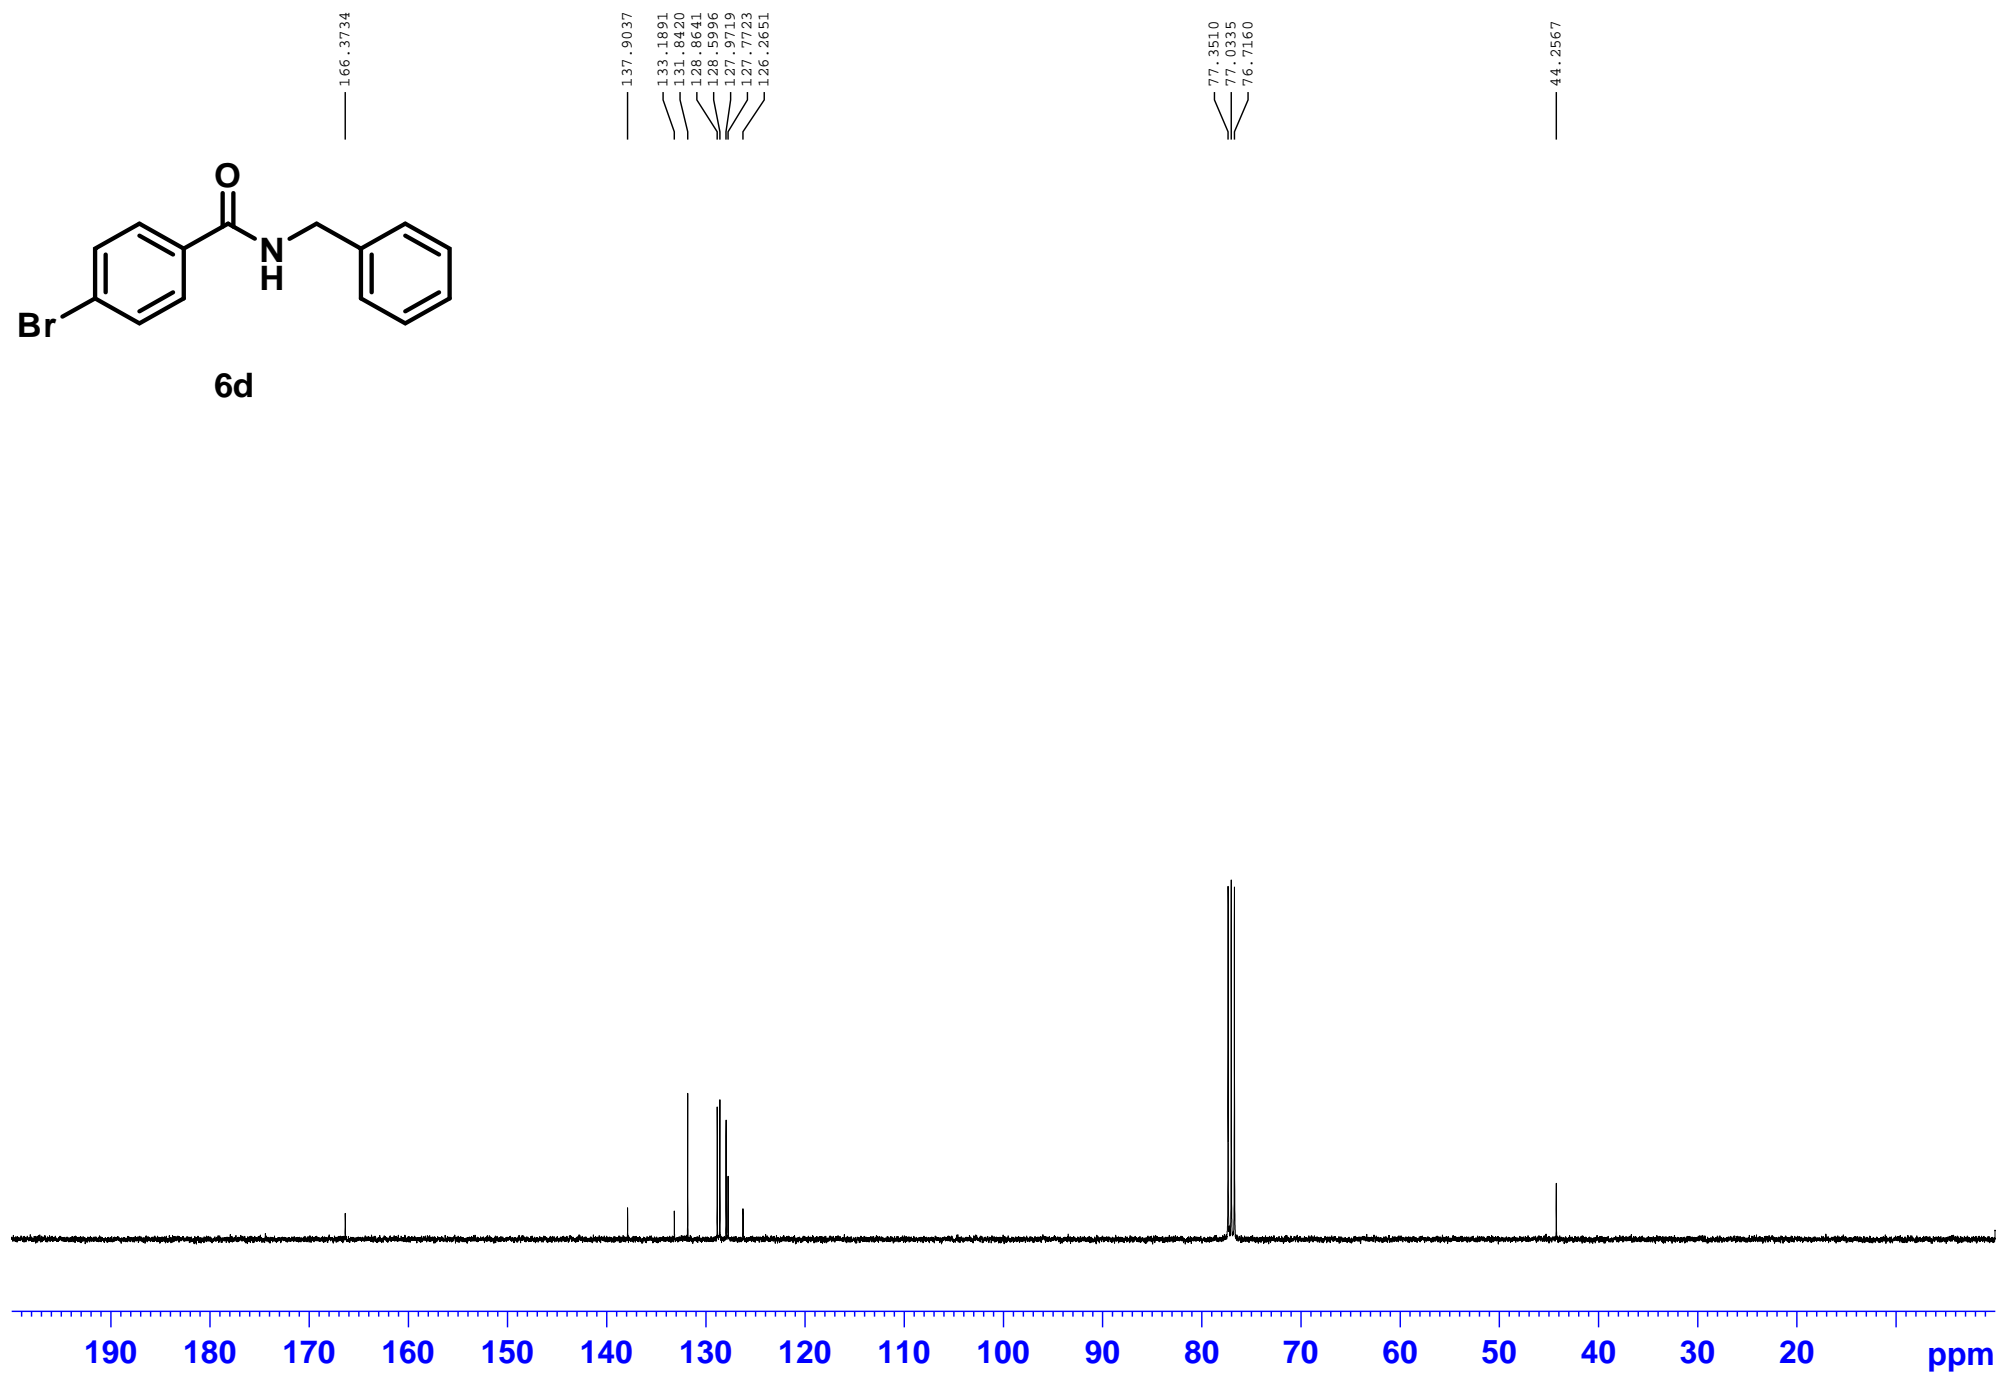

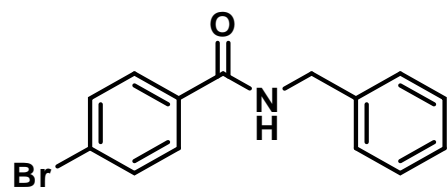

6d

7.6679  
7.6467  
7.5694  
7.5480  
7.3829  
7.3621  
7.3481  
7.3333  
7.3269  
7.3234  
7.3056  
7.2960  
7.2908  
7.2625

6.4229

4.6346  
4.6205

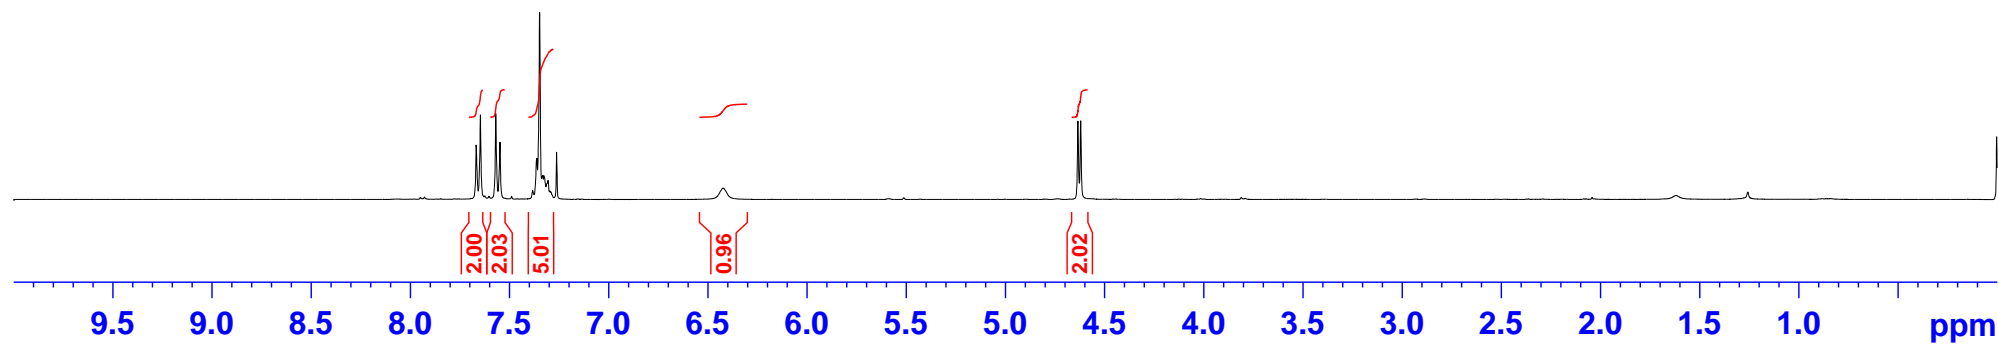

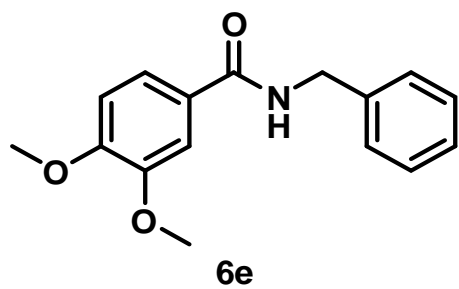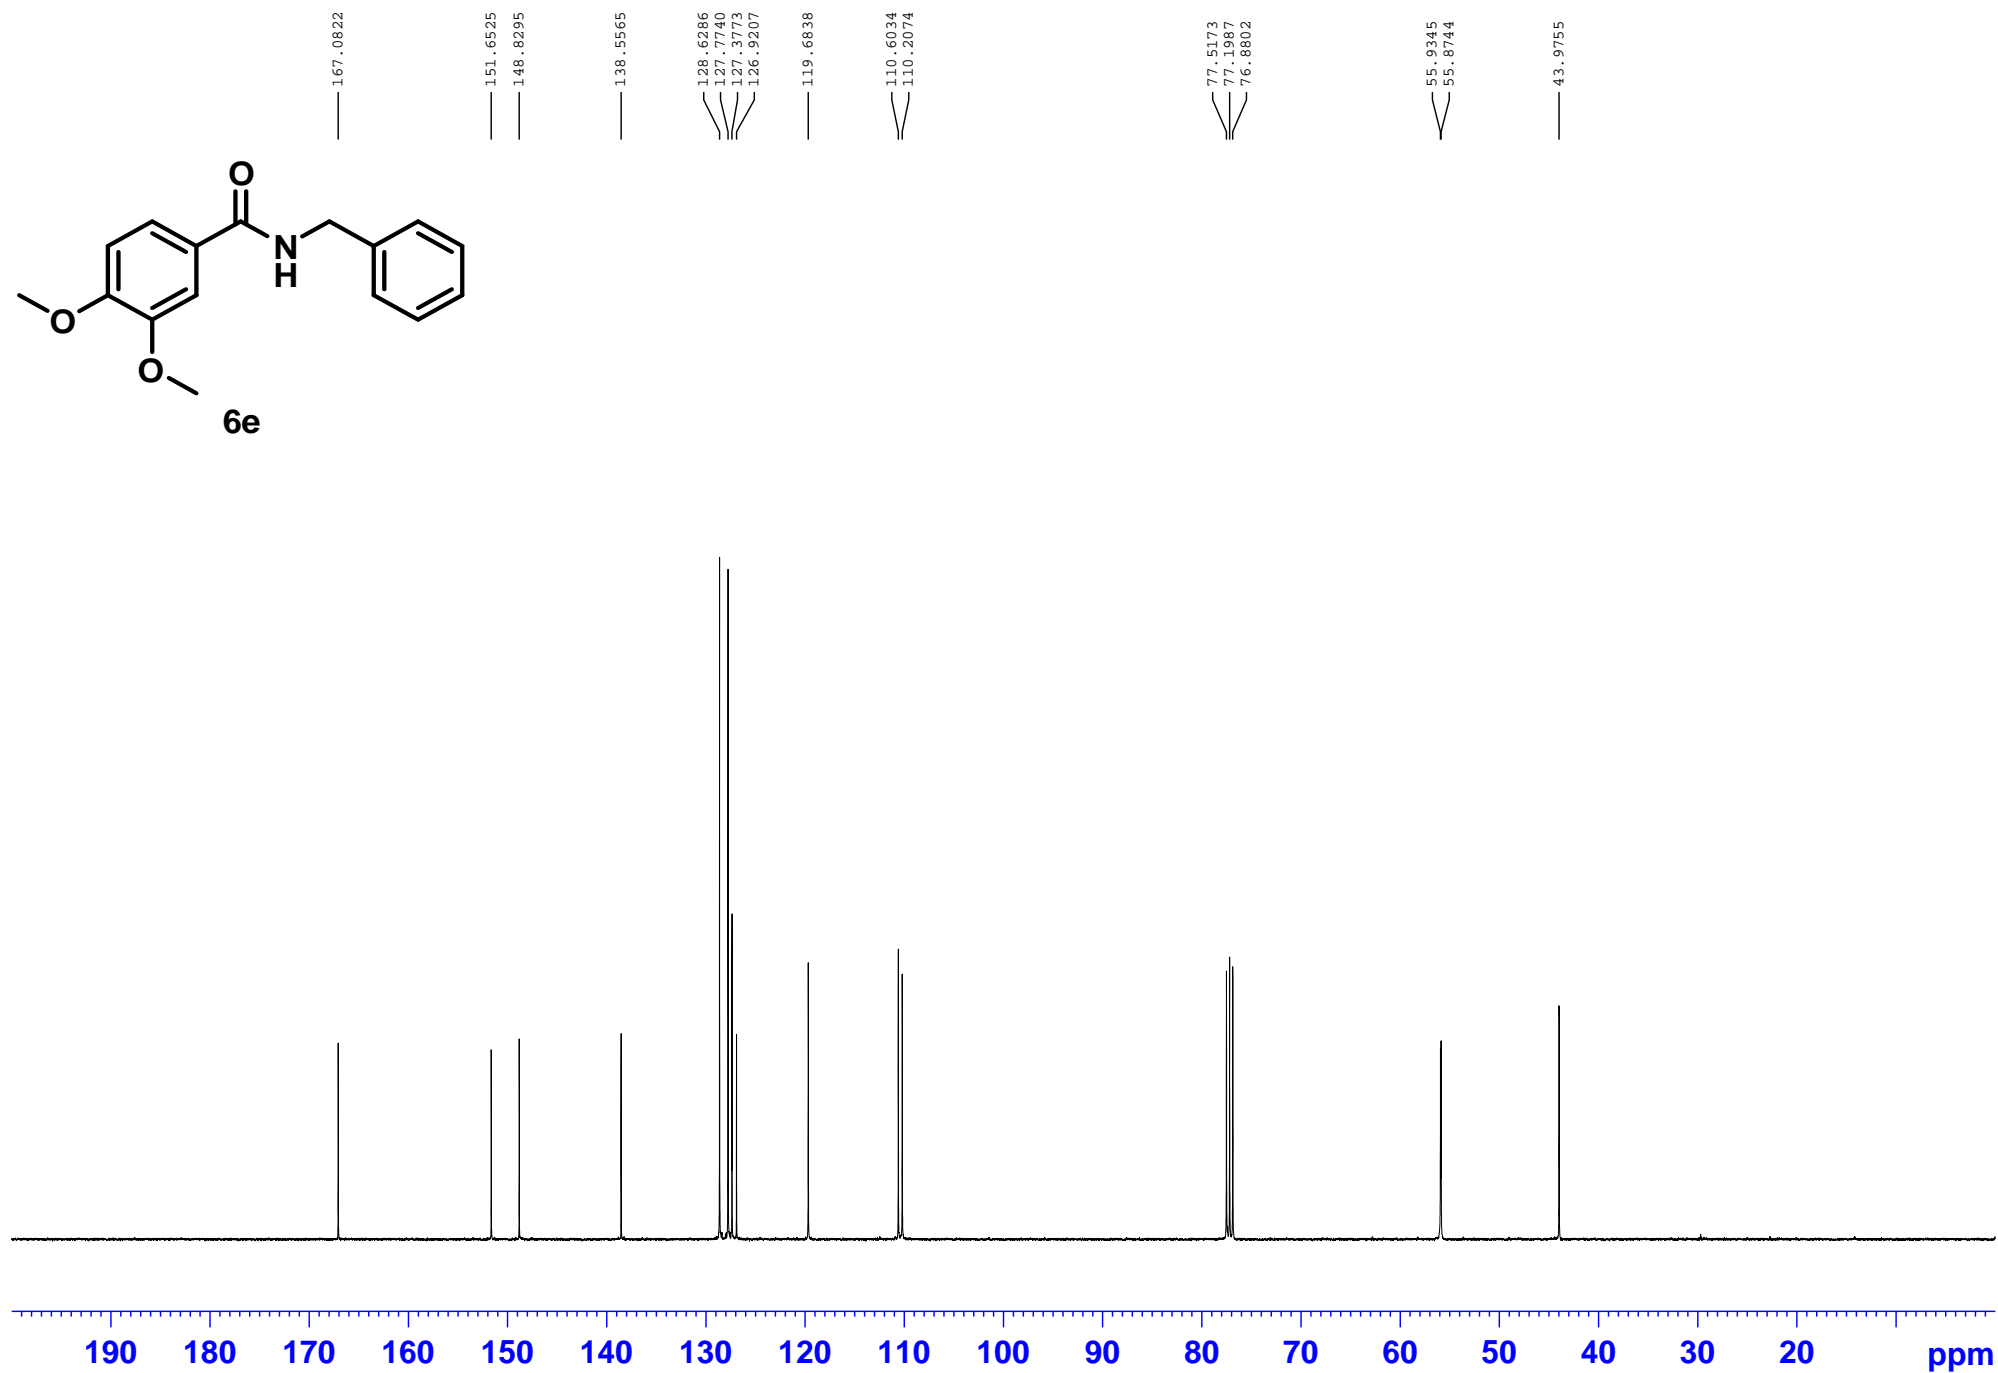



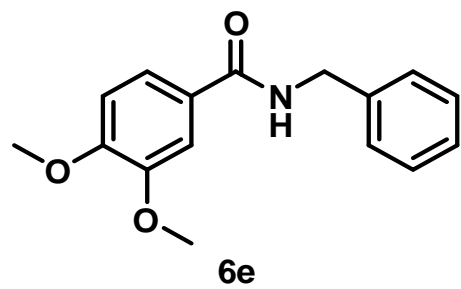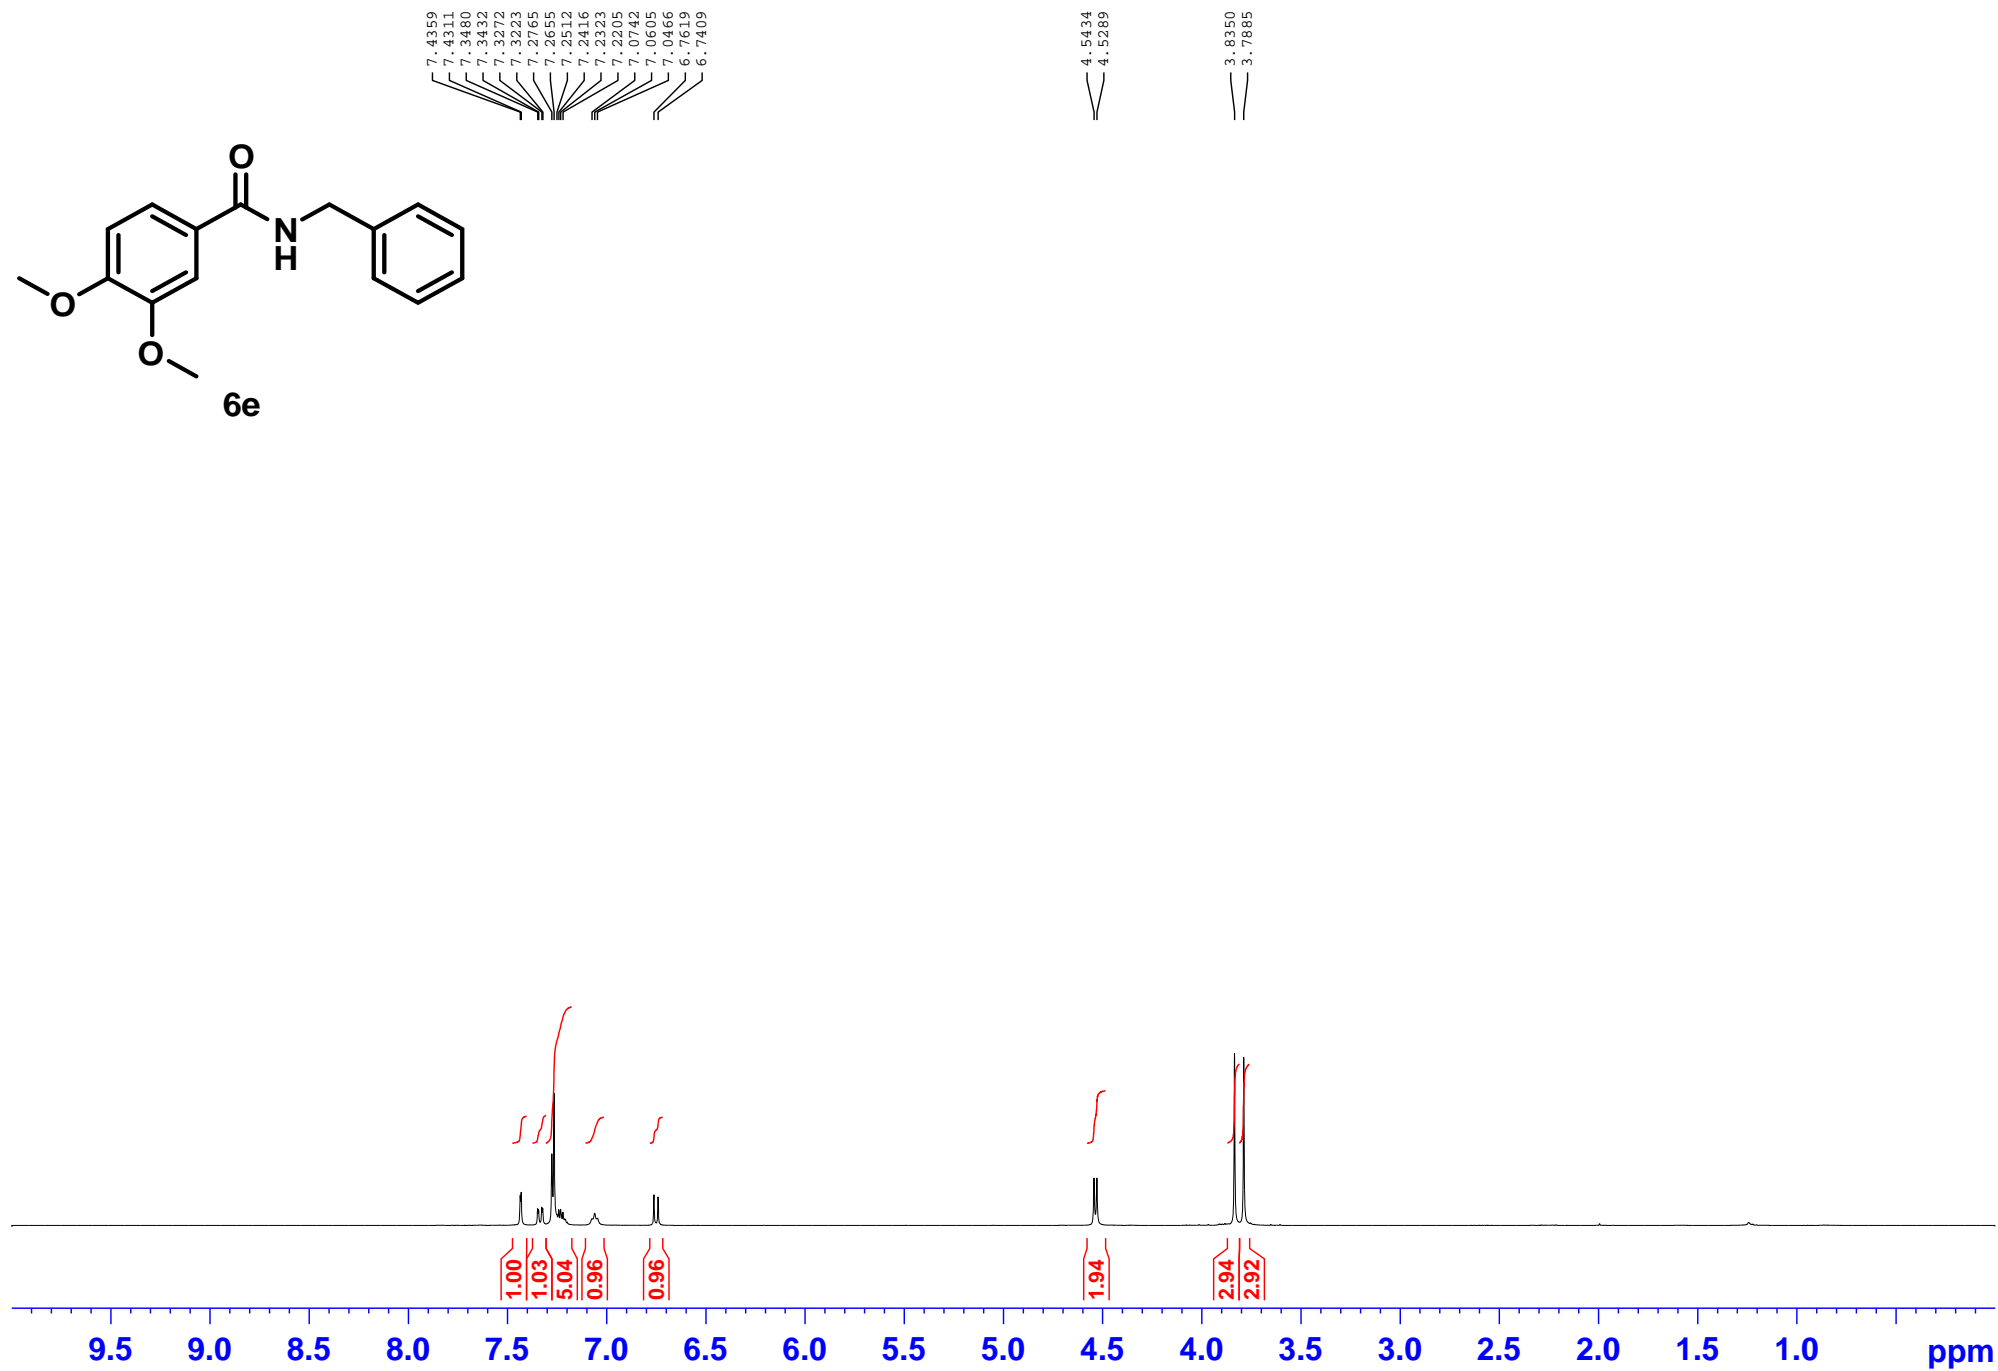

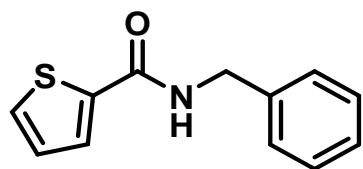

6g

161.8118

138.7581  
138.0453

130.0672  
128.8022  
128.1701  
127.9624  
127.6801  
127.6676

77.3775  
77.2619  
77.0599  
76.7423

44.0103

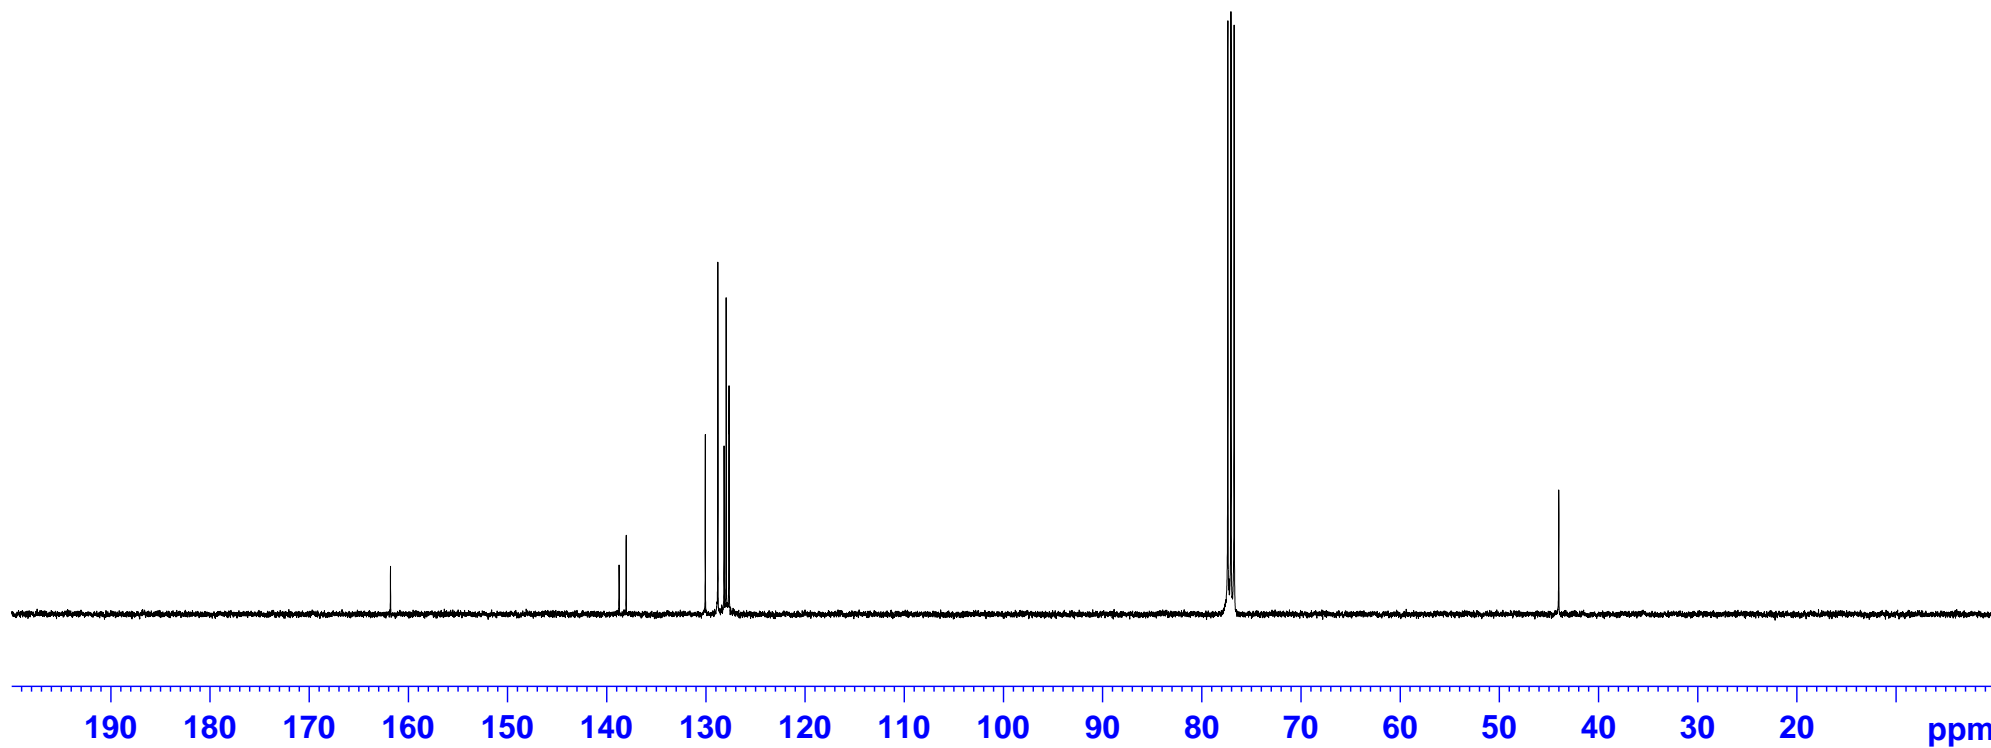

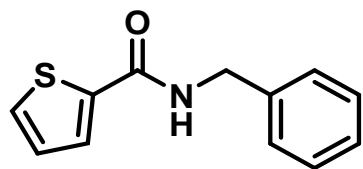

6g

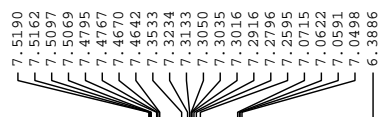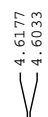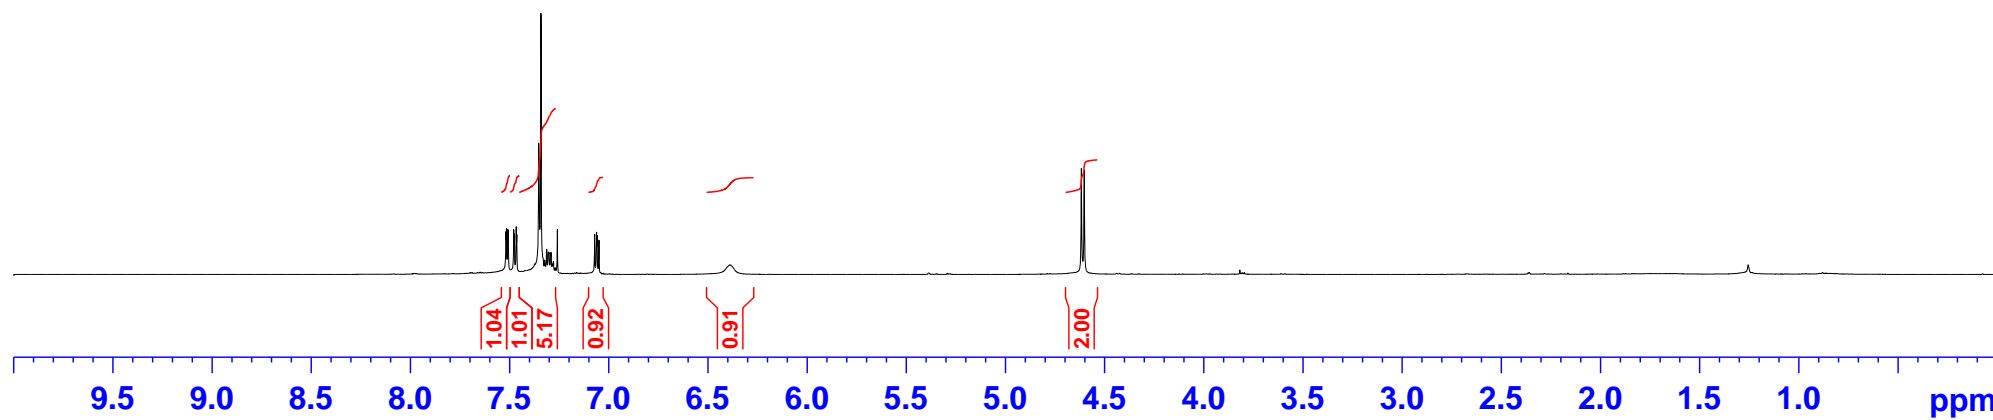

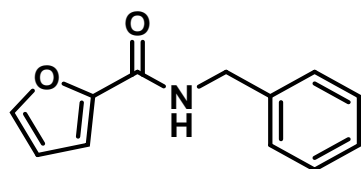

6h

158.3202

147.9009

143.9512

138.0648

128.7592  
127.9091  
127.6163

114.4026  
112.1824

77.4352  
77.1173  
76.7992

43.1421

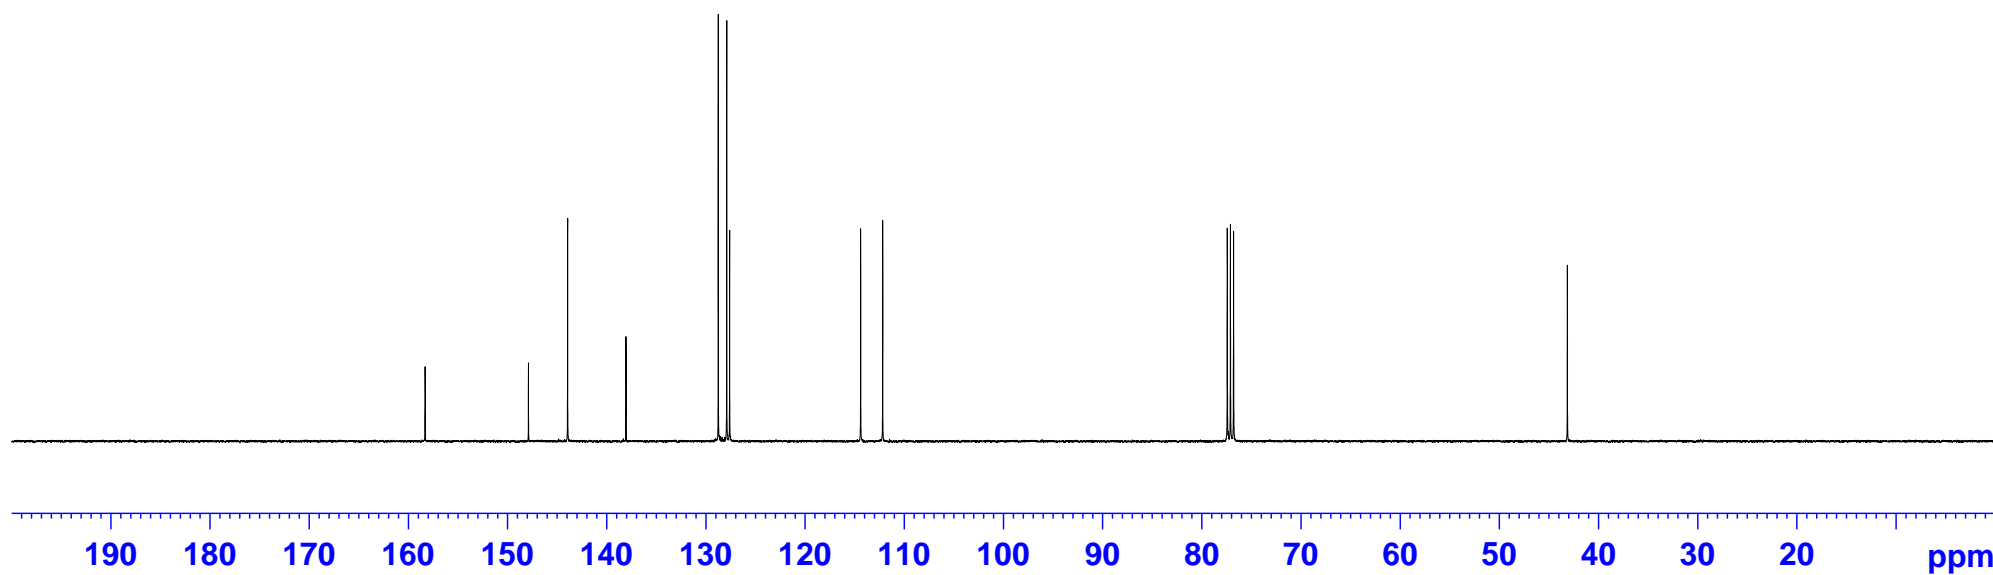

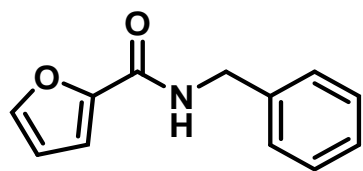

6h

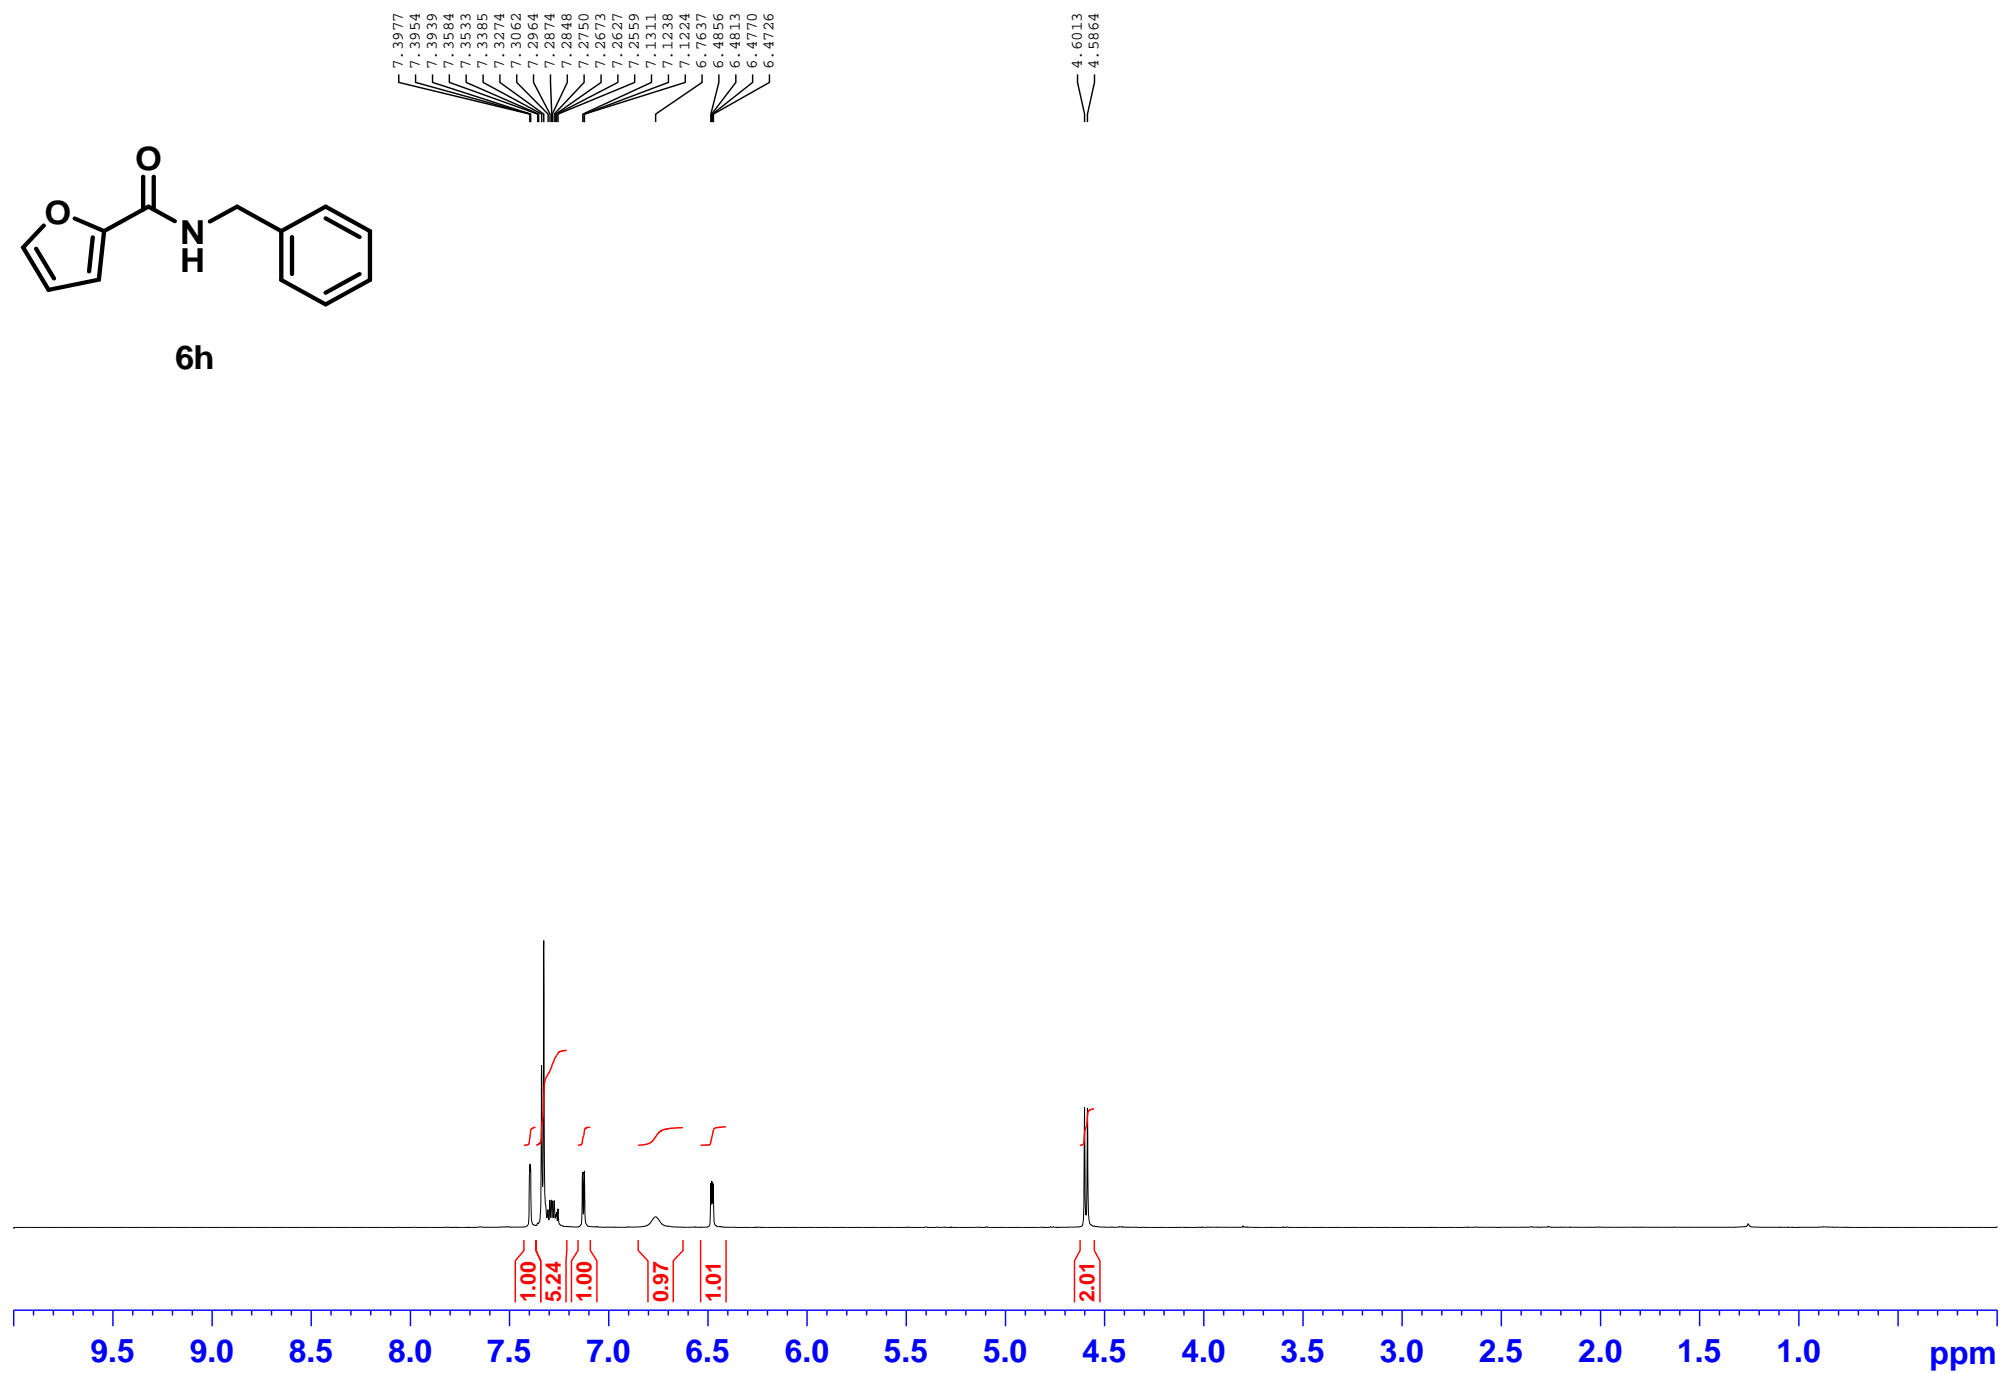

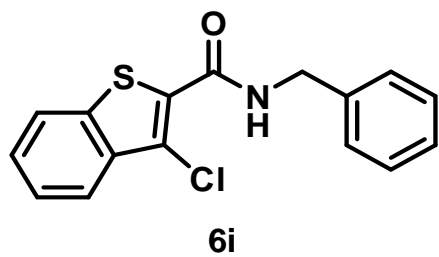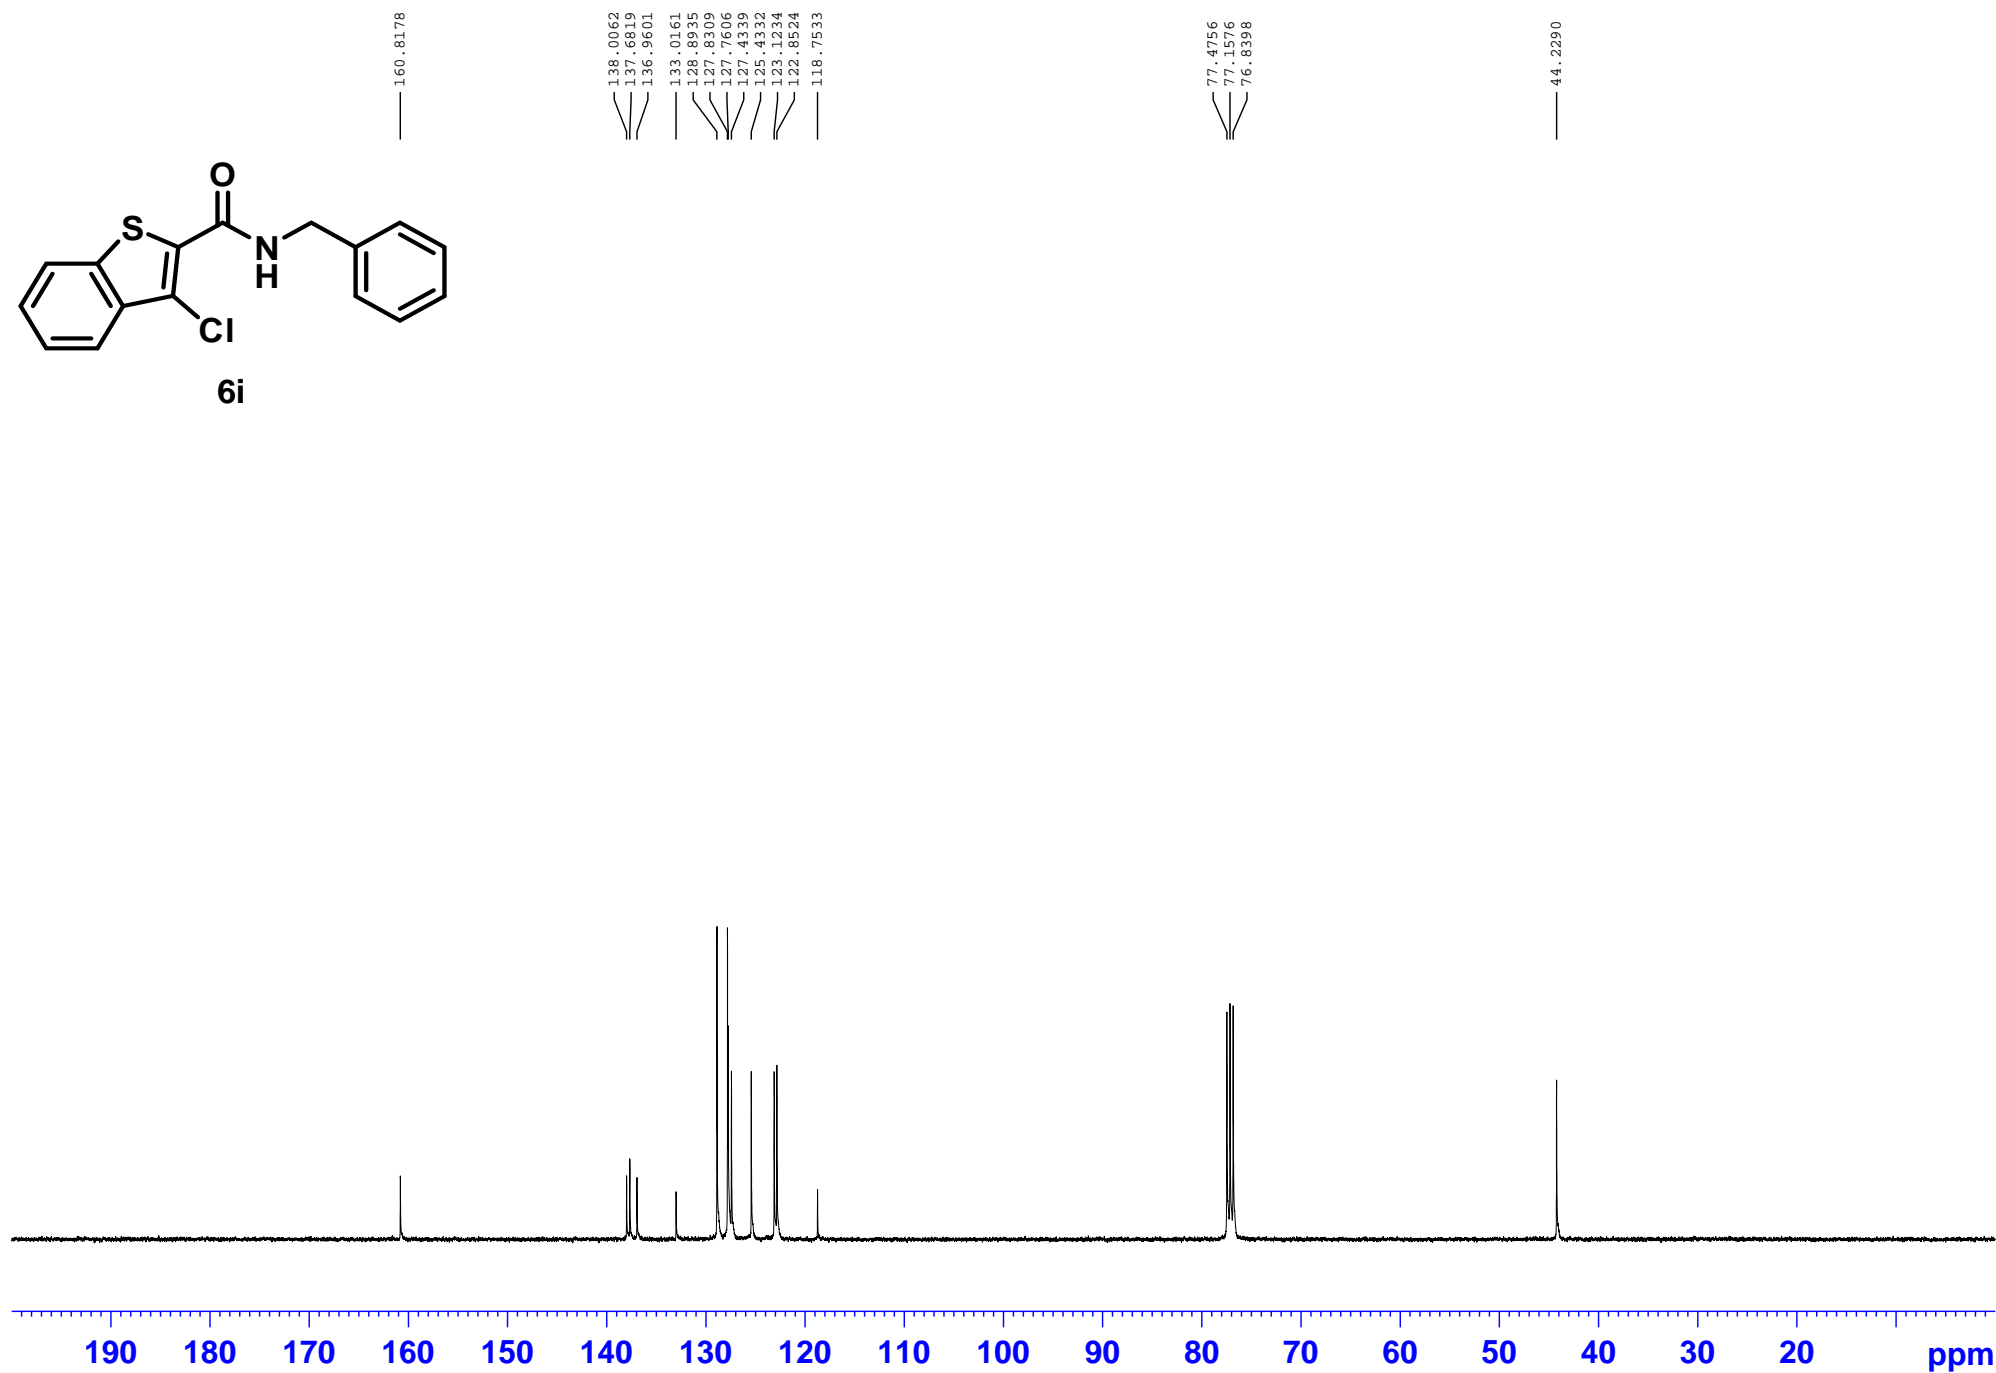

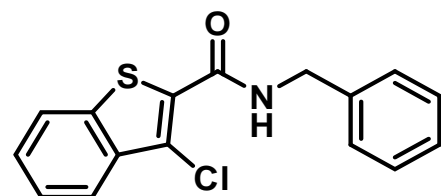

6i

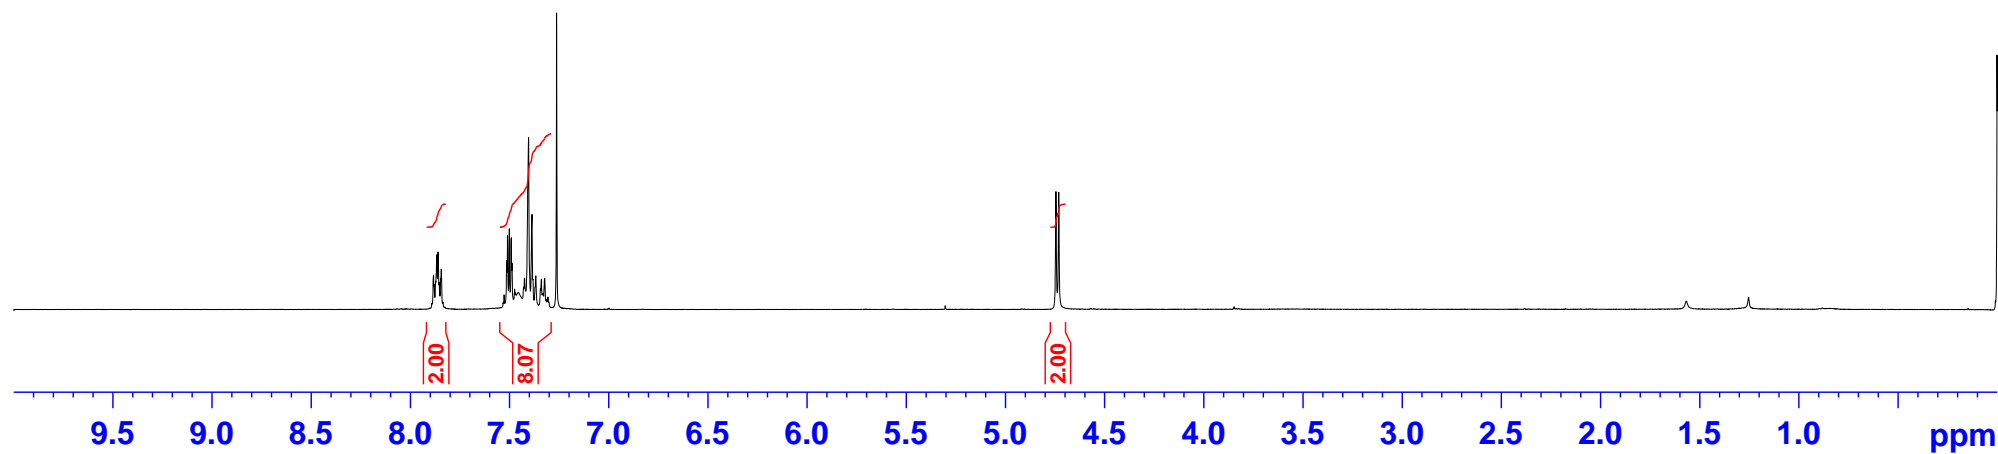

7.8832  
7.8798  
7.8724  
7.8667  
7.8604  
7.8543  
7.8467  
7.8441  
7.5271  
7.5143  
7.5098  
7.5008  
7.4914  
7.4874  
7.4741  
7.4694  
7.4549  
7.4291  
7.4242  
7.4040  
7.3868  
7.3673  
7.3442  
7.3396  
7.3341  
7.3301  
7.3227  
7.3154  
7.3062  
7.2625

4.7453  
4.7311

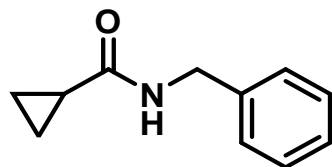

6j

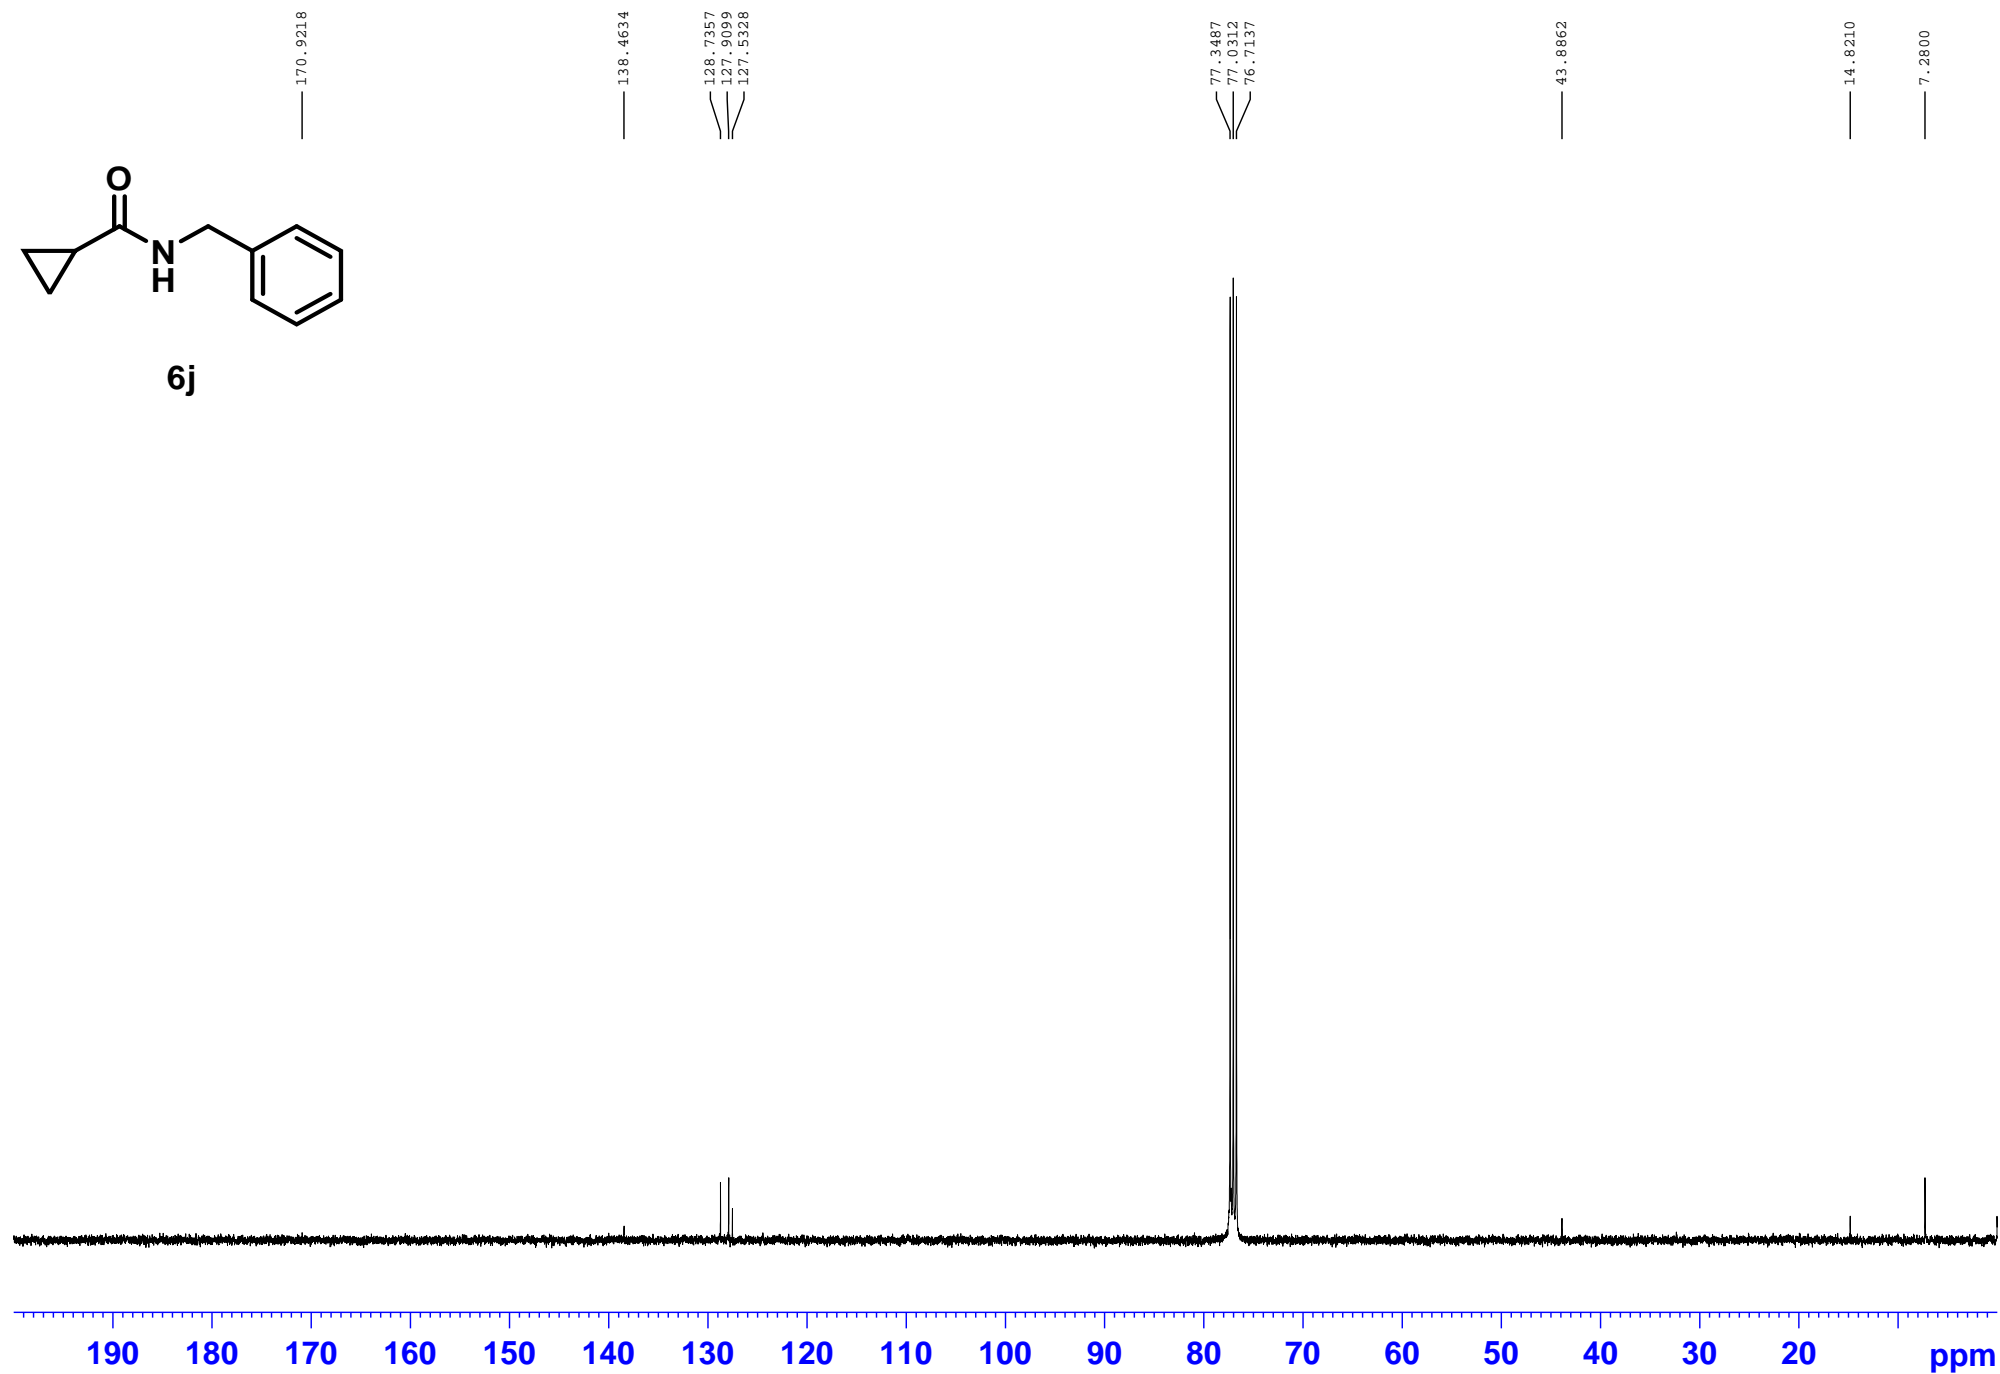



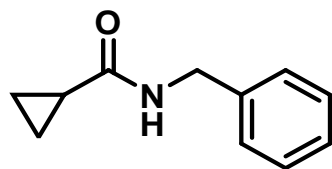

6j

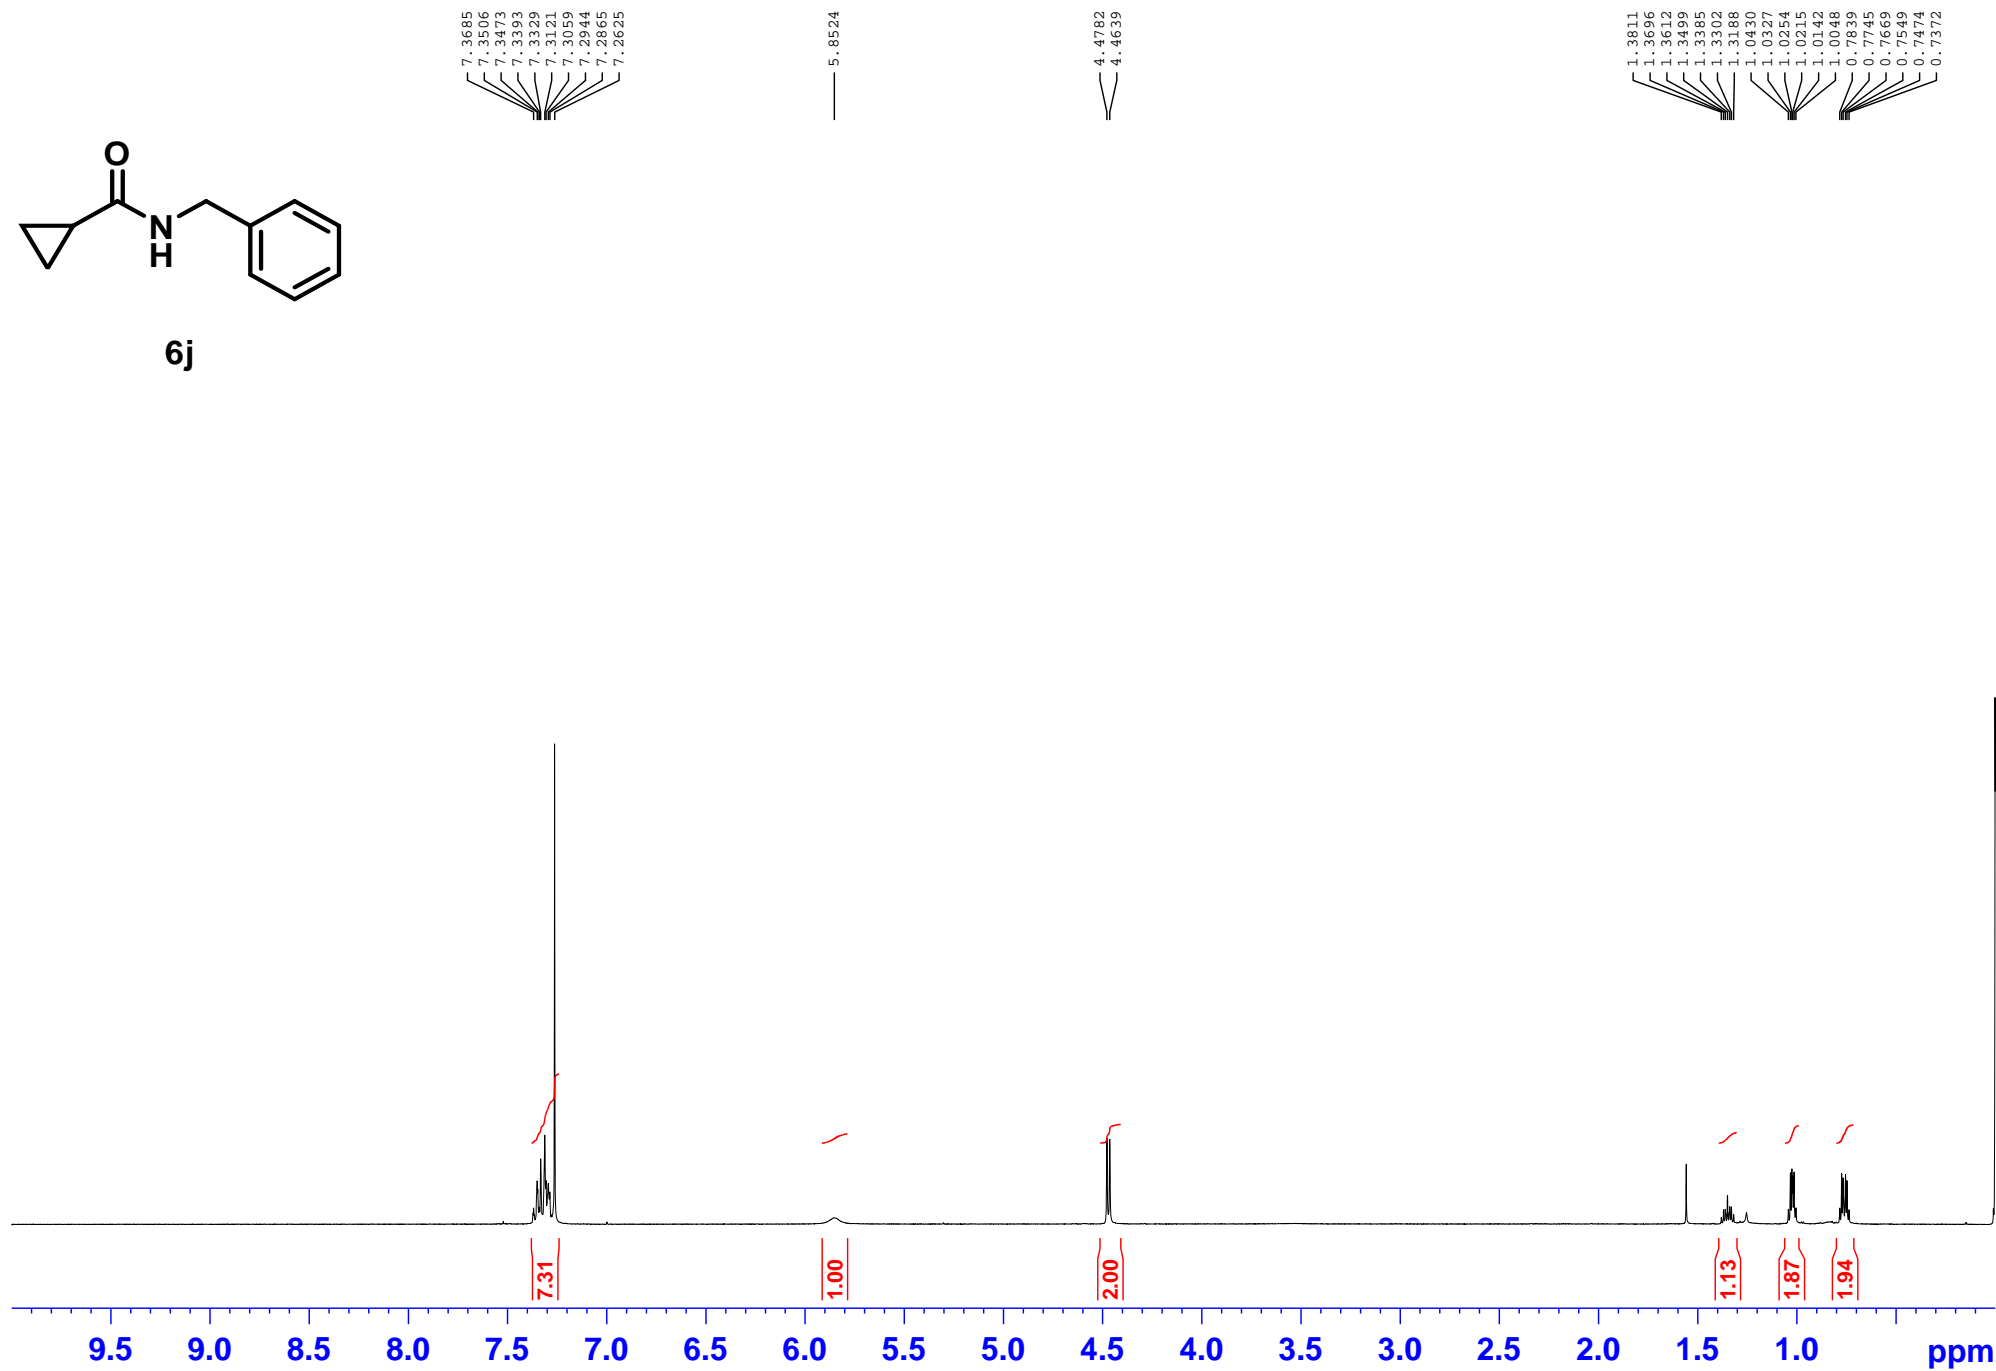

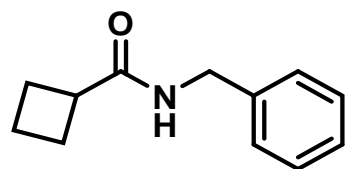

6k

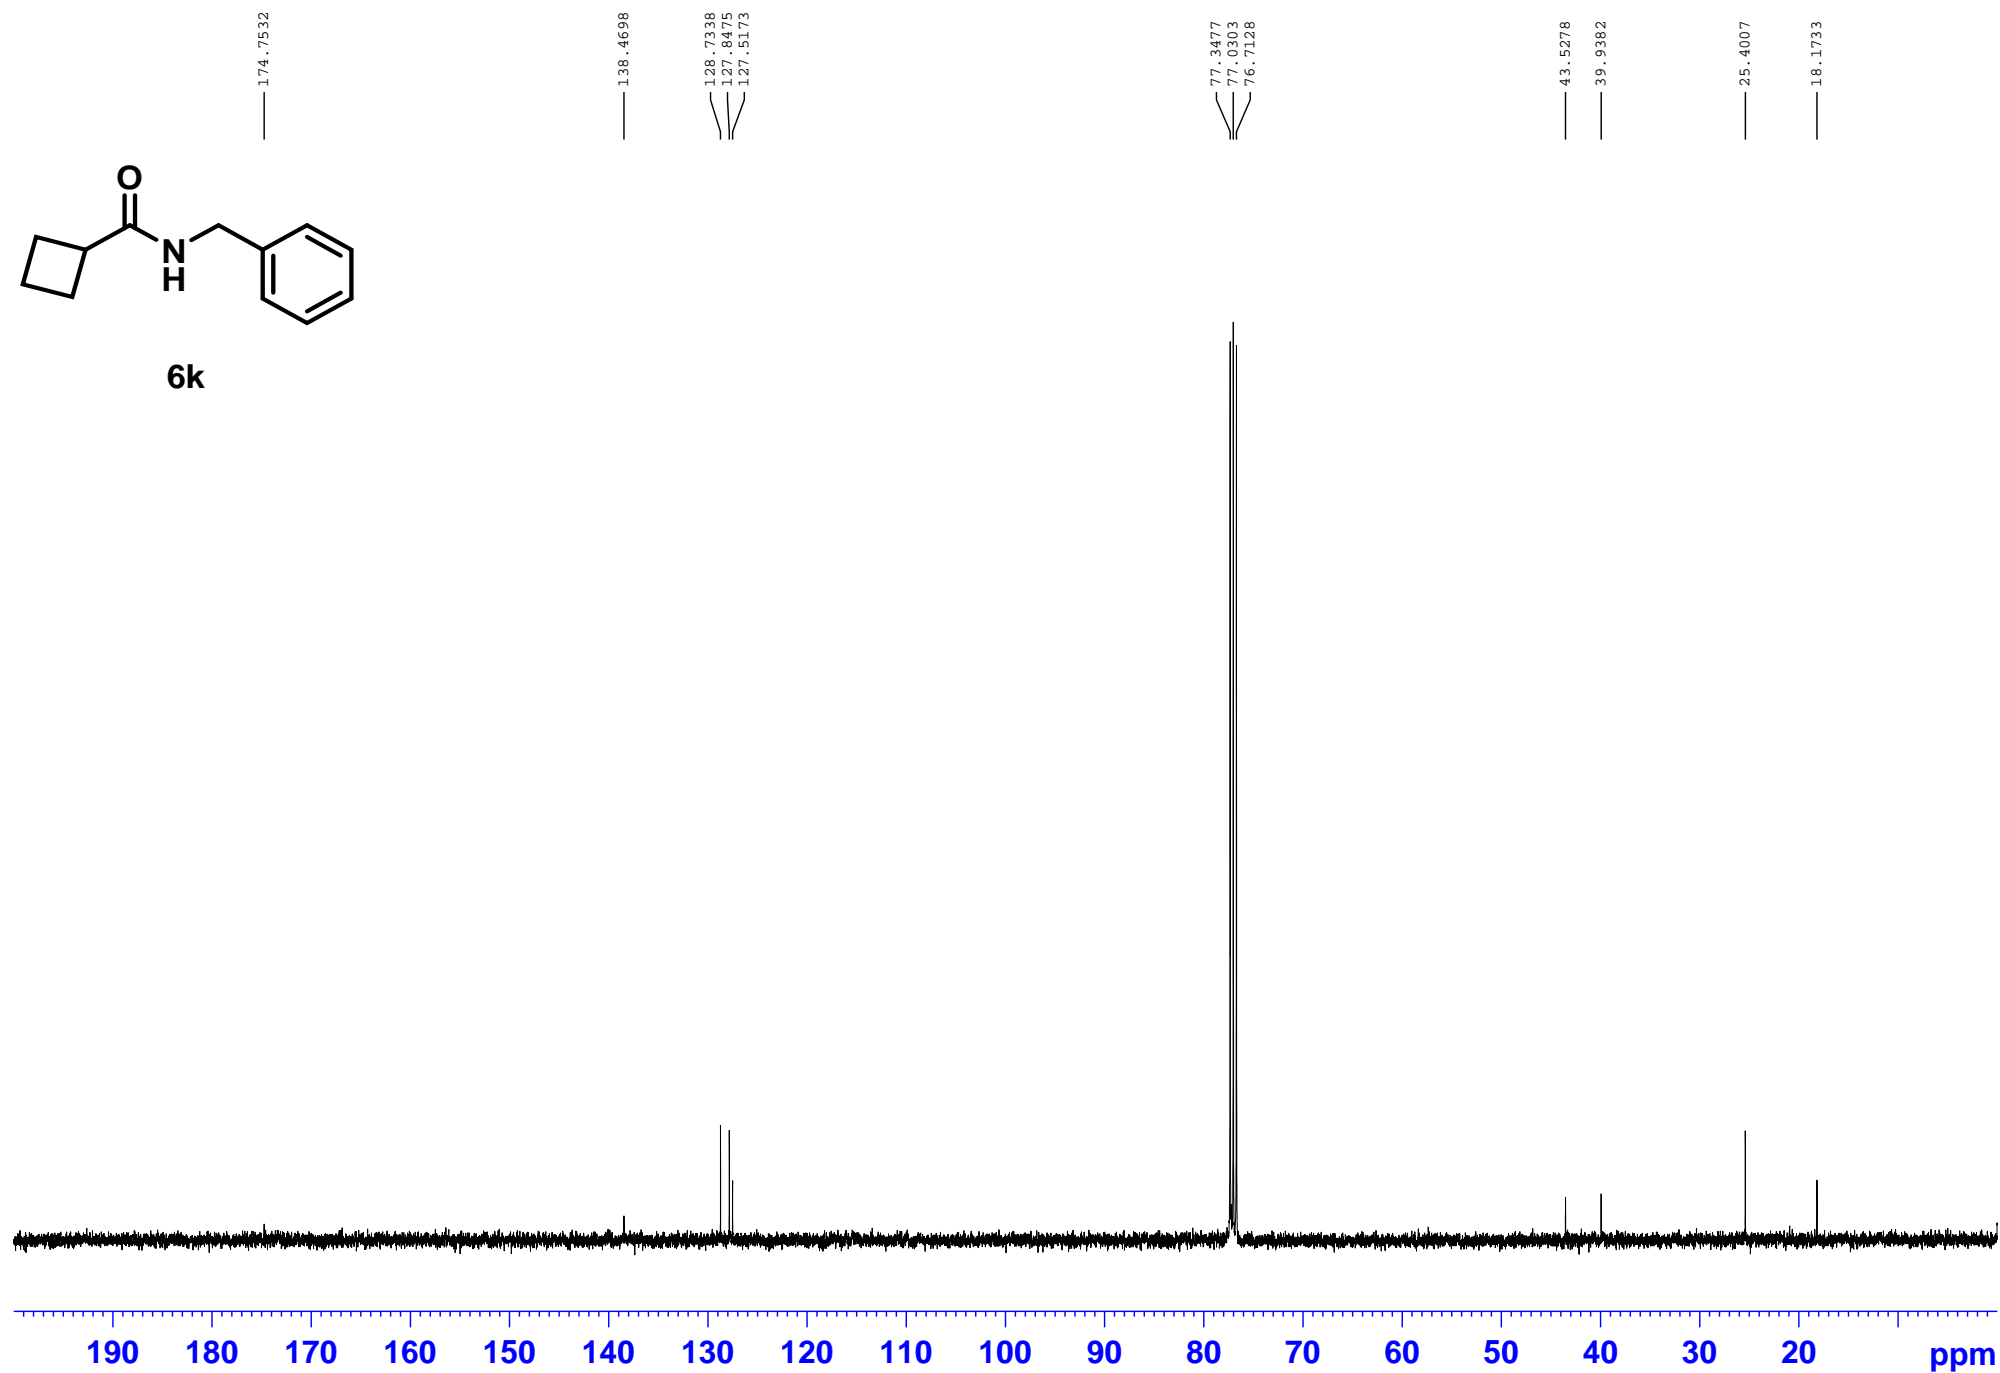

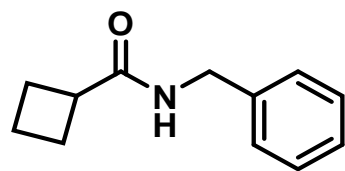

6k

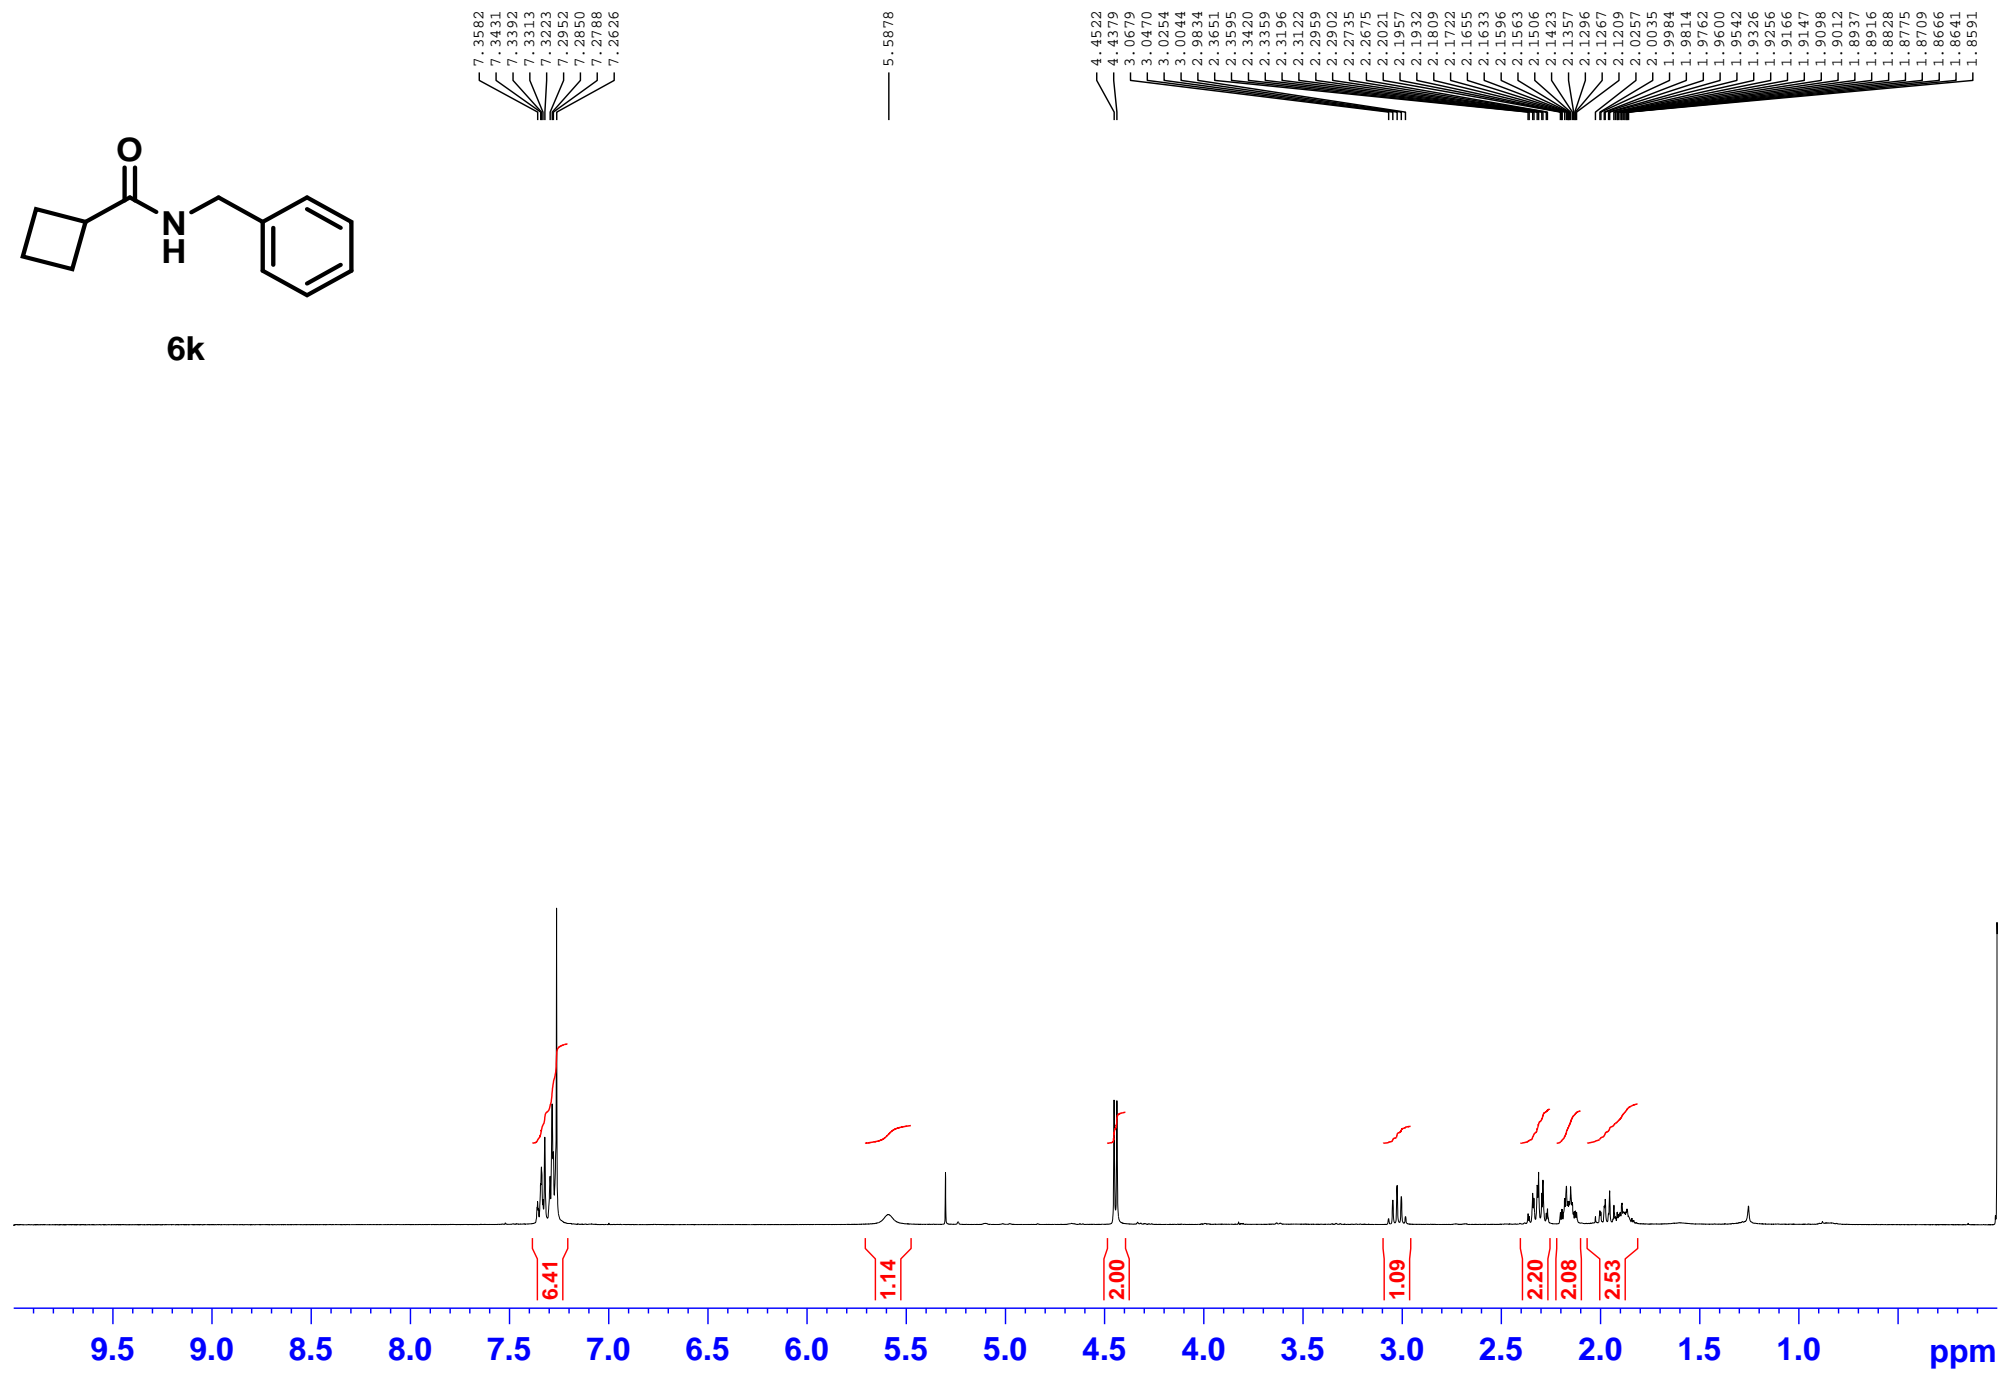

Supplement: c9gc01180c1.pdf [file c9gc01180c1.pdf]
