# Supplementary material for: Synthesis of amides from acid chlorides and amines in the bio-based solvent Cyrene™
Source: Royal Society of Chemistry journal article supplement (doi:10.1039/c9gc01180c), 2019-01-01
Supplement: c9gc01180c2.xlsx [file c9gc01180c2.xlsx]

## Sheet: Introduction
			MolE Calculator
			Department of Chemical Sciences
			School of Applied Sciences
			University of Huddersfield
			HD1 3DH UK
			Contact Person:		Dr. Athanasios Angelis-Dimakis
					a.angelisdimakis@hud.ac.uk
					Dr. Jason Camp
					j.e.camp@hud.ac.uk
		Date Published: March 2018
		This spreadsheet presents molar efficiency calculations and estimates the MolE% of synthesis processes. The spreadsheet also includes the calculation of the Process Mass Intensity (PMI) metric for each process.
		The Overview worksheet is read-only, presents a summary of all the calculations. The Scheme Description worksheet allows the user to write a few more details about the sources of the calculations. The next three worksheets (Reaction, Reaction Solvents and Workup & Purification) are the main input sheets of the calculator. The user enter the required information in the red-shaded cells, whereas th…
		A maximum of 30 different schemes can be supported using one copy of the calculator. A maximum of 100 different solvents/reagents can be added in the two libraries. The user should make sure that the contents of the libraries have been sorted, after having added all the new entries.
		The MolE% calculator is based on the work presented in: F. I. McGonagle, H. F. Sneddon, C. Jamieson and A. J. B. Watson, ACS Sustainable Chem. Eng., 2014, 2, 523–532.
		The PMI metric calculator is based on the Process Mass Intensity Calculation Tool developed by the ACS GCI Pharmaceutical Roundtable available at
		https://www.acs.org/content/acs/en/greenchemistry/research-innovation/tools-for-green-chemistry.html
		DISCLAIMER
		The spreadsheet has been subjected to internal and external review. Nevertheless, this does not guarantee that the contents are error-free. The developers cannot be held responsible for possible errors and abuse of the data provided, neither for the results of applying these data in case-studies. Note that parts of this spreadsheet may need regular updating.

## Sheet: Overview
This worksheet is an overview of all the schemes entered. You cannot alter the content of the cells in this worksheet. The molar quantities are in mmoles and the mass quantities are in g.
Scheme No	Scheme Name	Reaction Moles In	Reaction Moles Out	Solvents Moles	Solvents (Non Aq) Moles	Workup & Purification	W&P (Non Aq)	Total Moles In	Total Moles In (Non Aq)	Moles Out	Substrate Mass	Reagents Mass	Solvents Mass (Non Aq)	Aqueous Mass	Workup Mass (Non Aq)	Workup Mass (Aq)	Product Mass	MolE% (No Water)	MolE (No Water)	MolE (Full)	MolE% (Reaction Only)	MolE% (Full)	PMI (Reaction Only) [kg/kg]	PMI (Full) [kg/kg]
1
2
3
4
5
6
7
8
9
10
11
12
13
14
15
16
17
18
19
20
21
22
23
24
25
26
27
28
29
30

## Sheet: Scheme Description
Scheme	Abbreviation	Details
1
2
3
4
5
6
7
8
9
10
11
12
13
14
15
16
17
18
19
20
21
22
23
24
25
26
27
28
29
30

## Sheet: Reaction
Add the name of a reagent in the first column and the quantities of reactants used in mmol in the red shaded cells, by inserting L next to the limiting reactant. Insert the yield percentage in the corresponding row.
Scheme No		1		2		3		4		5		6		7		8		9		10		11		12		13		14		15		16		17		18		19		20		21		22		23		24
Scheme Name		0		0		0		0		0		0		0		0		0		0		0		0		0		0		0		0		0		0		0		0		0		0		0		0
Total Moles In (in mmol)		0		0		0		0		0		0		0		0		0		0		0		0		0		0		0		0		0		0		0		0		0		0		0		0
Total Moles Out (in mmol)		0		0		0		0		0		0		0		0		0		0		0		0		0		0		0		0		0		0		0		0		0		0		0		0
Product Molecular Weight
Total Mass Product (mg)		0		0		0		0		0		0		0		0		0		0		0		0		0		0		0		0		0		0		0		0		0		0		0		0
Reagents Mass In (excl. Limiting; mg)		0		0		0		0		0		0		0		0		0		0		0		0		0		0		0		0		0		0		0		0		0		0		0		0
Limiting Mass In (mg)		0		0		0		0		0		0		0		0		0		0		0		0		0		0		0		0		0		0		0		0		0		0		0		0
Yield
Name	Molecular Weight	Reagents Used (in mmol)
[truncated: 6 more columns]

## Sheet: Reaction Solvents
Insert the quantities of solvents used in the Orange Cells. Select the solvent from the drop-down list in Column A and the input type (moles, mass, volume) in Column B.
Scheme No				1		2		3		4		5		6		7		8		9		10		11		12		13		14		15		16		17		18		19		20		21		22		23
Scheme Name				0		0		0		0		0		0		0		0		0		0		0		0		0		0		0		0		0		0		0		0		0		0		0
Used Moles (in mmol)				0		0		0		0		0		0		0		0		0		0		0		0		0		0		0		0		0		0		0		0		0		0		0
Used Moles w/o water (in mmol)				0		0		0		0		0		0		0		0		0		0		0		0		0		0		0		0		0		0		0		0		0		0		0
Water (mass in g)				0		0		0		0		0		0		0		0		0		0		0		0		0		0		0		0		0		0		0		0		0		0		0
Solvent (mass in g)				0		0		0		0		0		0		0		0		0		0		0		0		0		0		0		0		0		0		0		0		0		0		0
Name		MW	Input Type	Solvents Used
	1
	1
	1
	1
	1
	1
	1
	1
	1
	1
	1
	1
	1
	1
	1
	1
	1
	1
[truncated: 7 more columns]

## Sheet: Workup & Purification
Select the reagent from the drop-down list in Column A and the input type (moles, mass, volume) in Column B. Then, for each reagent, add the quantity used in the orange column of each scheme.
Scheme No						1		2		3		4		5		6		7		8		9		10		11		12		13		14		15		16		17		18		19		20		21		22
Scheme Name						0		0		0		0		0		0		0		0		0		0		0		0		0		0		0		0		0		0		0		0		0		0
Used Moles (in mmol)						0		0		0		0		0		0		0		0		0		0		0		0		0		0		0		0		0		0		0		0		0		0
Used Moles w/o water (in mmol)						0		0		0		0		0		0		0		0		0		0		0		0		0		0		0		0		0		0		0		0		0		0
Water (mass in g)						0		0		0		0		0		0		0		0		0		0		0		0		0		0		0		0		0		0		0		0		0		0
Other Reagents (mass in g)						0		0		0		0		0		0		0		0		0		0		0		0		0		0		0		0		0		0		0		0		0		0
Name		Input Type	ρ (g/mL)	To Check	MW (g/mol)	Solvents Used
	1
	1
	1
	1
	1
	1
	1
	1
	1
	1
	1
	1
	1
[truncated: 8 more columns]

## Sheet: Solvents Library
The Solvents Library includes all the solvents that can be used in the Reaction Solvents worksheet. The user can edit this list and add/update its values. However, they should make sure that the list is sorted from A to Z after finishing adding all new entries and before using it.
Symbol	Name	Density (g/mL)	Molecular Weight (g/mol)
Ac2O	Acetic anhydride	1.082	102.09
Acetone	Acetone	0.7845	58.8
AcOH	Acetic acid	1.049	60.05
Benzene	Benzene	0.8765	78.11
CCl4	Carbon tetrachloride	1.5867	153.81
CHCl3	Chloroform	1.489	119.37
Chlorobenzene	Chlorobenzene	1.11	112.56
Cyrene	Cyrene	1.25	128.13
DCE	1,2-Dichloroethane	1.253	98.95
DCM	Dichloromethane	1.326	84.96
Diethylether	Diethylether	0.713	74.12
Diglyme	Diglyme	0.937	134.18
Dioxane	1,4-Dioxane	1.033	88.11
DMA	N,N-Dimethylacetamide	0.937	87.12
DMAc	Dimethylacetamide	0.937	87.12
DME	Dimethoxyethane	0.8683	90.12
DMF	Dimethylformamide	0.948	73.1
DMPU	1,3-Dimethyl-3,4,5,6-tetrahydro-2(1H)-pyrimidinone	1.064	128.18
DMSO	Dimethyl sulfoxide	1.1004	78.13
Ethylene glycol	Ethylene glycol	1.1132	62.07
EtOAc	Ethyl Acetate	0.902	88.11
EtOH	Ethanol	0.7893	46.07
Heptane	n-Heptane	0.6795	100.21
Hexanes	Hexanes	0.6606	86.18
i-PrOH	Isopropanol	0.786	60.1
Me-THF	2-Methyltetrahydrofuran	0.854	86.13
MeCN	Acetonitrile	0.786	41.05
MeOH	Methanol	0.792	32.04
n-BuOAc	n-Butylacetate	0.8825	116.16
Nitromethane	Nitromethane	1.1371	61.04
NMP	N-Methyl-2-pyrrolidone	1.028	99.13
Pentane	Pentane	0.626	72.15
Petrol	Petrolium ether (35 °C - 60 °C)	0.653	82.2
Pyridine	Pyridine	0.9819	79.1
Sulfolane	Sulfolane	1.261	120.17
t-BuOH	tert-Butyl alcohol	0.775	74.12
THF	Tetrahydrofuran	0.8892	72.11
Toluene	Toluene	0.87	92.14
Water	Water	1	18.02
Xylenes	Xylenes	0.864	106.16

## Sheet: Reagents Library
The Reagents Library includes all the reagents that can be used in the Workup & Purification worksheet. The user can edit this list and add/update its values. However, they should make sure that the list is sorted from A to Z after finishing adding all new entries and before using it.
Symbol	Name	Density (g/mL)	Molecular Weight (g/mol)
Ac2O	Acetic anhydride	1.082	102.09
Acetone	Acetone	0.7845	58.8
AcOH	Acetic acid	1.049	60.05
Aluminum oxide	Aluminum oxide	-	101.96
Benzene	Benzene	0.8765	78.11
CCl4	Carbon tetrachloride	1.5867	153.81
CHCl3	Chloroform	1.489	119.37
Chlorobenzene	Chlorobenzene	1.11	112.56
Cyrene	Cyrene	1.25	128.13
DCE	1,2-Dichloroethane	1.253	98.95
DCM	Dichloromethane	1.326	84.96
Diethylether	Diethylether	0.713	74.12
Diglyme	Diglyme	0.937	134.18
DMA	N,N-Dimethylacetamide	0.937	87.12
DMAc	Dimethylacetamide	0.937	87.12
DME	Dimethoxyethane	0.8683	90.12
DMF	Dimethylformamide	0.948	73.1
DMPU	1,3-Dimethyl-3,4,5,6-tetrahydro-2(1H)-pyrimidinone	1.064	128.18
DMSO	Dimethyl sulfoxide	1.1004	78.13
Ethylene glycol	Ethylene glycol	1.1132	62.07
EtOAc	Ethyl Acetate	0.902	88.11
EtOH	Ethanol	0.7893	46.07
HCl	Hydrochloric acid	1.49	36.46
Heptane	n-Heptane	0.6795	100.21
Hexanes	Hexanes	0.6606	86.18
i-PrOH	Isopropanol	0.786	60.1
MeCN	Acetonitrile	0.786	41.05
MeOH	Methanol	0.792	32.04
Me-THF	2-Methyltetrahydrofuran	0.854	86.13
MgSO4	MgSO4	-	120.37
Na2SO4	Sodium sulfate	-	142.04
NaCl	Sodium chloride	-	58.44
NaHCO3	Sodium bicarbonate	-	84
NaOH	sodium hydroxide	-	40
n-BuOAc	n-Butylacetate	0.8825	116.16
Nitromethane	Nitromethane	1.1371	61.04
NMP	N-Methyl-2-pyrrolidone	1.028	99.13
Pentane	Pentane	0.626	72.15
Petrol	Petrolium ether (35 °C - 60 °C)	0.653	82.2
Pyridine	Pyridine	0.9819	79.1
Silica Gel	Silica Gel	-	60.08
Sulfolane	Sulfolane	1.261	120.17
t-BuOH	tert-Butyl alcohol	0.775	74.12
THF	Tetrahydrofuran	0.8892	72.11
Toluene	Toluene	0.87	92.14
Water	Water	1	18.02
Xylenes	Xylenes	0.864	106.16

## Sheet: Help Sheet
	Input Type	Limiting
	g	L
	mL
	mmol
	Approximations use for methods lacking specific details
	1. 100 g SiO2 per 1.0 mmol (up to 10 mmol): 50 g SiO2 per 1.0 mmol (up to 10 mmol) using automated purification system
	2. 1.0 L solvent for first 1.0 mmol and then 500 mL solvent for each mmol thereafter (up to 10 mmol) for column chromatography: 0.5 L solvent and then 250 mL solvent for each mmol thereafter (up to 10 mmol) using automated purification system
	3. 10.0 g silica gel for a "silica plug" or "filtered through silica" (up to 10 mmol)
	4. 5.0 mL per 1.0 mmol for recrystallization (up to 10 mmol)
	5. drying agent (MgSO4 or Na2SO4) 2.0 g per 1 mmol
