# Supplementary material for: Synthesis of amides from acid chlorides and amines in the bio-based solvent Cyrene™
Source: Royal Society of Chemistry journal article supplement (doi:10.1039/c9gc01180c), 2019-01-01
Supplement: c9gc01180c3.xlsx [file c9gc01180c3.xlsx]

## Sheet: Introduction
			MolE Calculator
			Department of Chemical Sciences
			School of Applied Sciences
			University of Huddersfield
			HD1 3DH UK
			Contact Person:		Dr. Athanasios Angelis-Dimakis
					a.angelisdimakis@hud.ac.uk
					Dr. Jason Camp
					j.e.camp@hud.ac.uk
		Date Published: March 2018
		This spreadsheet presents molar efficiency calculations and estimates the MolE% of synthesis processes. The spreadsheet also includes the calculation of the Process Mass Intensity (PMI) metric for each process.
		The Overview worksheet is read-only, presents a summary of all the calculations. The Scheme Description worksheet allows the user to write a few more details about the sources of the calculations. The next three worksheets (Reaction, Reaction Solvents and Workup & Purification) are the main input sheets of the calculator. The user enter the required information in the red-shaded cells, whereas th…
		A maximum of 30 different schemes can be supported using one copy of the calculator. A maximum of 100 different solvents/reagents can be added in the two libraries. The user should make sure that the contents of the libraries have been sorted, after having added all the new entries.
		The MolE% calculator is based on the work presented in: F. I. McGonagle, H. F. Sneddon, C. Jamieson and A. J. B. Watson, ACS Sustainable Chem. Eng., 2014, 2, 523–532.
		The PMI metric calculator is based on the Process Mass Intensity Calculation Tool developed by the ACS GCI Pharmaceutical Roundtable available at
		https://www.acs.org/content/acs/en/greenchemistry/research-innovation/tools-for-green-chemistry.html
		DISCLAIMER
		The spreadsheet has been subjected to internal and external review. Nevertheless, this does not guarantee that the contents are error-free. The developers cannot be held responsible for possible errors and abuse of the data provided, neither for the results of applying these data in case-studies. Note that parts of this spreadsheet may need regular updating.

## Sheet: Overview
This worksheet is an overview of all the schemes entered. You cannot alter the content of the cells in this worksheet. The molar quantities are in mmoles and the mass quantities are in g.
Scheme No	Scheme Name	Reaction Moles In	Reaction Moles Out	Solvents Moles	Solvents (Non Aq) Moles	Workup & Purification	W&P (Non Aq)	Total Moles In	Total Moles In (Non Aq)	Moles Out	Substrate Mass	Reagents Mass	Solvents Mass (Non Aq)	Aqueous Mass	Workup Mass (Non Aq)	Workup Mass (Aq)	Product Mass	MolE% (No Water)	MolE (No Water)	MolE (Full)	MolE% (Reaction Only)	MolE% (Full)	PMI (Reaction Only) [kg/kg]	PMI (Full) [kg/kg]
1	Amide Pyrrol Aq	1.55	0.455	4.87786	4.87786	8615.22	5840.52	8621.64	5846.95	0.455	0.0722865	0.0912145	0.625	0	487.25	50	0.0879151	7.78184e-05	7.78184e-05	5.27742e-05	0.293548	5.27742e-05	1.85976	6119.98
2	Amide Pyrrol Col	1.55	0.375	4.87786	4.87786	5324.51	5324.51	5330.93	5330.93	0.375	0.0722865	0.0912145	0.625	0	441.65	0	0.0724575	7.03441e-05	7.03441e-05	7.03441e-05	0.241935	7.03441e-05	2.25651	6106.18
3	Amide Aniline ppt	1.55	0.36	4.87786	4.87786	277.469	0	283.897	6.42786	0.36	0.0722865	0.102219	0.625	0	0	5	0.0774792	0.0560062	0.0560062	0.00126806	0.232258	0.00126806	2.25229	74.8524
4	Amide Benzyl ppt	1.55	0.405	4.87786	4.87786	277.469	0	283.897	6.42786	0.405	0.0722865	0.10923	0.625	0	0	5	0.0928463	0.063007	0.063007	0.00142657	0.26129	0.00142657	1.95502	62.539
5	DMF-1	25.6	7.6	389.056	389.056	68272.2	57173.4	68686.9	57588.1	7.6	0.96944	2.66422	28.44	0	4648.2	200	1.36207	0.000131972	0.000131972	0.000110647	0.296875	0.000110647	2.66774	3582.98
6	DMF-2	3	0.45	389.056	389.056	14621.7	14621.7	15013.7	15013.7	0.45	0.22656	0.299353	28.44	0	1606.25	0	0.209448	2.99725e-05	2.99725e-05	2.99725e-05	0.15	2.99725e-05	2.51095	7807.26
7	THF-1	13.5	0.63	89.7004	89.7004	24244.4	22024.6	24347.6	22127.8	0.63	0.639183	1.25772	6.4683	0	1775.05	40	0.17153	2.84709e-05	2.84709e-05	2.58753e-05	0.0466667	2.58753e-05	11.0587	10630.3
8	CH2Cl2-1	11.98	2.331	624.294	624.294	31353.6	24694.4	31989.9	25330.6	2.331	0.500103	1.03408	53.04	0	1988.39	120	0.685594	9.20229e-05	9.20229e-05	7.28667e-05	0.194574	7.28667e-05	2.23774	3154.88
9	CH2Cl2-2	34	7.8	390.184	390.184	67194.7	65529.8	67618.8	65954	7.8	1.72025	2.90577	33.15	0	4579.48	30	2.61425	0.000118264	0.000118264	0.000115352	0.229412	0.000115352	1.76954	1777.66
10
11
12
13
14
15
16
17
18
19
20
21
22
23
24
25
26
27
28
29
30

## Sheet: Scheme Description
Scheme	Abbreviation	Details
1	Amide Pyrrol Aq	Amide synthesis in Cyrene using 4-fluorobenzoyl chloride and pyrrolidine - Aq w/u followed by column
2	Amide Pyrrol Col	Amide synthesis in Cyrene using 4-fluorobenzoyl chloride and pyrrolidine - straight column
3	Amide Aniline ppt	Amide synthesis in Cyrene using 4-fluorobenzoyl chloride and aniline - Aq precipitation
4	Amide Benzyl ppt	Amide synthesis in Cyrene using 4-fluorobenzoyl chloride and benzylamine - Aq precipitation
5	DMF-1	H. Kurouchi, K. Kawamoto, H. Sugimoto, S. Nakamura, Y. Otani and T. Ohwada, J. Org. Chem., 2012, 77, 9313-9328.
6	DMF-2	Lee, B. D;. Li, Z.; French, K. J.; Zhuang, Y.; Xia, Z.; Smith, C. D. J. Med. Chem. 2004, 47, 1413–1422.
7	THF-1	Konishi, M.; Tsuchida, K.; Sano, K.; Kochi, T.; Kakiuchi, F. J. Org. Chem.2017, 82, 8716–8724.
8	CH2Cl2-1	Reddy, M. D.; Blanton, A. N.; Watkins, E. B. J. Org. Chem. 2017, 82, 5080–5095.
9	CH2Cl2-2	Li, W.; Wu, X.-F. J. Org. Chem. 2014, 79, 10410–10416.
10
11
12
13
14
15
16
17
18
19
20
21
22
23
24
25
26
27
28
29
30

## Sheet: Reaction
Add the name of a reagent in the first column and the quantities of reactants used in mmol in the red shaded cells, by inserting L next to the limiting reactant. Insert the yield percentage in the corresponding row.
Scheme No		1		2		3		4		5		6		7		8		9		10		11		12		13		14		15		16		17		18		19		20		21		22		23		24
Scheme Name		Amide Pyrrol Aq		Amide Pyrrol Col		Amide Aniline ppt		Amide Benzyl ppt		DMF-1		DMF-2		THF-1		CH2Cl2-1		CH2Cl2-2		0		0		0		0		0		0		0		0		0		0		0		0		0		0		0
Total Moles In (in mmol)		1.55		1.55		1.55		1.55		25.6		3		13.5		11.98		34		0		0		0		0		0		0		0		0		0		0		0		0		0		0		0
Total Moles Out (in mmol)		0.455		0.375		0.36		0.405		7.6		0.45		0.63		2.331		7.8		0		0		0		0		0		0		0		0		0		0		0		0		0		0		0
Product Molecular Weight		193.22		193.22		215.22		229.25		179.22		465.44		272.27		294.12		335.16
Total Mass Product (mg)		87.9151		72.4575		77.4792		92.8463		1362.07		209.448		171.53		685.594		2614.25		0		0		0		0		0		0		0		0		0		0		0		0		0		0		0
Reagents Mass In (excl. Limiting; mg)		91.2145		91.2145		102.219		109.23		2664.22		299.353		1257.72		1034.08		2905.77		0		0		0		0		0		0		0		0		0		0		0		0		0		0		0
Limiting Mass In (mg)		72.2865		72.2865		72.2865		72.2865		969.44		226.56		639.183		500.103		1720.25		0		0		0		0		0		0		0		0		0		0		0		0		0		0		0
Yield		0.91		0.75		0.72		0.81		0.95		0.45		0.21		0.7		0.78
Name	Molecular Weight	Reagents Used (in mmol)
4-Fluorobenzyl chloride	144.573	L	0.5	L	0.5	L	0.5	L	0.5								3.66		11
Triethylamine	101.19		0.55		0.55		0.55		0.55		8.8				6		4.99		13
Pyrrolidine	71.12		0.5		0.5
Aniline	93.13						0.5
Benzylamine	107.15								0.5
Phenylethylamine	121.18									L	8
Chloroformate	201.562										8.8
N-(2-Aminophenyl)-acetamide	150.181															L	3.33
2-Bromoaniline	172.025																	L	10
(4'-Aminophenyl)-2,2'-(4'-hydroxyphenyl)-propane	227.307
1-Benzyl-2,3-dihydro-1H-pyrrolo[2,3-b]quinolin-4-ylamine	275.355												1
4-Fluoro-3-(trifluoromethyl)benzoyl chloride	226.56											L	1
Sodium hydride	23.9977												1
5,7-Dichloroquinolin-8-amine	213.061													L	3
3-Fluorobenzyl chloride	144.573														4.5
[truncated: 6 more columns]

## Sheet: Reaction Solvents
Insert the quantities of solvents used in the Orange Cells. Select the solvent from the drop-down list in Column A and the input type (moles, mass, volume) in Column B.
Scheme No				1		2		3		4		5		6		7		8		9		10		11		12		13		14		15		16		17		18		19		20		21		22		23
Scheme Name				Amide Pyrrol Aq		Amide Pyrrol Col		Amide Aniline ppt		Amide Benzyl ppt		DMF-1		DMF-2		THF-1		CH2Cl2-1		CH2Cl2-2		0		0		0		0		0		0		0		0		0		0		0		0		0		0
Used Moles (in mmol)				4.87786		4.87786		4.87786		4.87786		389.056		389.056		89.7004		624.294		390.184		0		0		0		0		0		0		0		0		0		0		0		0		0		0
Used Moles w/o water (in mmol)				4.87786		4.87786		4.87786		4.87786		389.056		389.056		89.7004		624.294		390.184		0		0		0		0		0		0		0		0		0		0		0		0		0		0
Water (mass in g)				0		0		0		0		0		0		0		0		0		0		0		0		0		0		0		0		0		0		0		0		0		0		0
Solvent (mass in g)				0.625		0.625		0.625		0.625		28.44		28.44		6.4683		53.04		33.15		0		0		0		0		0		0		0		0		0		0		0		0		0		0
Name		MW	Input Type	Solvents Used
Cyrene	1	128.13	mL	0.5	4.87786	0.5	4.87786	0.5	4.87786	0.5	4.87786
DMF	1	73.1	mL									30	389.056	30	389.056
DCM	1	84.96	mL															40	624.294	25	390.184
NMP	1	99.13	mL
THF	1	72.11	mL													10	89.7004
	1
	1
	1
	1
	1
	1
	1
	1
	1
	1
	1
	1
	1
	1
	1
	1
	1
	1
	1
	1
	1
	1
	1
[truncated: 7 more columns]

## Sheet: Workup & Purification
Select the reagent from the drop-down list in Column A and the input type (moles, mass, volume) in Column B. Then, for each reagent, add the quantity used in the orange column of each scheme.
Scheme No						1		2		3		4		5		6		7		8		9		10		11		12		13		14		15		16		17		18		19		20		21		22
Scheme Name						Amide Pyrrol Aq		Amide Pyrrol Col		Amide Aniline ppt		Amide Benzyl ppt		DMF-1		DMF-2		THF-1		CH2Cl2-1		CH2Cl2-2		0		0		0		0		0		0		0		0		0		0		0		0		0
Used Moles (in mmol)						8615.22		5324.51		277.469		277.469		68272.2		14621.7		24244.4		31353.6		67194.7		0		0		0		0		0		0		0		0		0		0		0		0		0
Used Moles w/o water (in mmol)						5840.52		5324.51		0		0		57173.4		14621.7		22024.6		24694.4		65529.8		0		0		0		0		0		0		0		0		0		0		0		0		0
Water (mass in g)						50		0		5		5		200		0		40		120		30		0		0		0		0		0		0		0		0		0		0		0		0		0
Other Reagents (mass in g)						487.25		441.65		0		0		4648.2		1606.25		1775.05		1988.39		4579.48		0		0		0		0		0		0		0		0		0		0		0		0		0
Name		Input Type	ρ (g/mL)	To Check	MW (g/mol)	Solvents Used
EtOAc	1	mL	0.902	EtOAc	88.11	300	3071.16	250	2559.3					3150	32247.2			430	4402	645	6603	275	2815.23
Water	0	mL	1	Water	18.02	50	2774.69			5	277.469	5	277.469	200	11098.8			40	2219.76	120	6659.27	30	1664.82
Hexanes	1	mL	0.6606	Hexanes	86.18	250	1916.34	250	1916.34					1500	11498			1608	12325.9	1505	11536.4
Silica Gel	1	g	-	Silica Gel	60.08	51	848.868	51	848.868					800	13315.6	110	1830.89	300	4993.34	333	5542.61	1000	16644.5
MgSO4	1	g	-	MgSO4	120.37	0.5	4.15386													6.66	55.3294	10	83.0772
Na2SO4	1	g	-	Na2SO4	142.04									16	112.644			6	42.2416
DCM	1	mL	1.326	DCM	84.96													7.5	117.055	40	624.294	30	468.22
NaHCO3	1	g	-	NaHCO3	84													1.9	22.619	3.8	45.2381
HCl	1	g	1.49	HCl	36.46															1.5	41.141
NaCl	1	g	-	NaCl	58.44													7.1	121.492	14.4	246.407	10.8	184.805
Pentane	1	mL	0.626	Pentane	72.15																	5225	45334
DMF	1	mL	0.948	DMF	73.1											15	194.528
CHCl3	1	mL	1.489	CHCl3	119.37											990	12349.1
MeOH	1	mL	0.792	MeOH	32.04											10	247.191
	1
	1
	1
	1
	1
	1
	1
	1
	1
	1
	1
	1
	1
	1
[truncated: 8 more columns]

## Sheet: Solvents Library
The Solvents Library includes all the solvents that can be used in the Reaction Solvents worksheet. The user can edit this list and add/update its values. However, they should make sure that the list is sorted from A to Z after finishing adding all new entries and before using it.
Symbol	Name	Density (g/mL)	Molecular Weight (g/mol)
Ac2O	Acetic anhydride	1.082	102.09
Acetone	Acetone	0.7845	58.8
AcOH	Acetic acid	1.049	60.05
Benzene	Benzene	0.8765	78.11
CCl4	Carbon tetrachloride	1.5867	153.81
CHCl3	Chloroform	1.489	119.37
Chlorobenzene	Chlorobenzene	1.11	112.56
Cyrene	Cyrene	1.25	128.13
DCE	1,2-Dichloroethane	1.253	98.95
DCM	Dichloromethane	1.326	84.96
Diethylether	Diethylether	0.713	74.12
Diglyme	Diglyme	0.937	134.18
Dioxane	1,4-Dioxane	1.033	88.11
DMA	N,N-Dimethylacetamide	0.937	87.12
DMAc	Dimethylacetamide	0.937	87.12
DME	Dimethoxyethane	0.8683	90.12
DMF	Dimethylformamide	0.948	73.1
DMPU	1,3-Dimethyl-3,4,5,6-tetrahydro-2(1H)-pyrimidinone	1.064	128.18
DMSO	Dimethyl sulfoxide	1.1004	78.13
Ethylene glycol	Ethylene glycol	1.1132	62.07
EtOAc	Ethyl Acetate	0.902	88.11
EtOH	Ethanol	0.7893	46.07
Heptane	n-Heptane	0.6795	100.21
Hexanes	Hexanes	0.6606	86.18
i-PrOH	Isopropanol	0.786	60.1
Me-THF	2-Methyltetrahydrofuran	0.854	86.13
MeCN	Acetonitrile	0.786	41.05
MeOH	Methanol	0.792	32.04
n-BuOAc	n-Butylacetate	0.8825	116.16
Nitromethane	Nitromethane	1.1371	61.04
NMP	N-Methyl-2-pyrrolidone	1.028	99.13
Pentane	Pentane	0.626	72.15
Petrol	Petrolium ether (35 °C - 60 °C)	0.653	82.2
Pyridine	Pyridine	0.9819	79.1
Sulfolane	Sulfolane	1.261	120.17
t-BuOH	tert-Butyl alcohol	0.775	74.12
THF	Tetrahydrofuran	0.8892	72.11
Toluene	Toluene	0.87	92.14
Water	Water	1	18.02
Xylenes	Xylenes	0.864	106.16

## Sheet: Reagents Library
The Reagents Library includes all the reagents that can be used in the Workup & Purification worksheet. The user can edit this list and add/update its values. However, they should make sure that the list is sorted from A to Z after finishing adding all new entries and before using it.
Symbol	Name	Density (g/mL)	Molecular Weight (g/mol)
Ac2O	Acetic anhydride	1.082	102.09
Acetone	Acetone	0.7845	58.8
AcOH	Acetic acid	1.049	60.05
Aluminum oxide	Aluminum oxide	-	101.96
Benzene	Benzene	0.8765	78.11
CCl4	Carbon tetrachloride	1.5867	153.81
CHCl3	Chloroform	1.489	119.37
Chlorobenzene	Chlorobenzene	1.11	112.56
Cyrene	Cyrene	1.25	128.13
DCE	1,2-Dichloroethane	1.253	98.95
DCM	Dichloromethane	1.326	84.96
Diethylether	Diethylether	0.713	74.12
Diglyme	Diglyme	0.937	134.18
DMA	N,N-Dimethylacetamide	0.937	87.12
DMAc	Dimethylacetamide	0.937	87.12
DME	Dimethoxyethane	0.8683	90.12
DMF	Dimethylformamide	0.948	73.1
DMPU	1,3-Dimethyl-3,4,5,6-tetrahydro-2(1H)-pyrimidinone	1.064	128.18
DMSO	Dimethyl sulfoxide	1.1004	78.13
Ethylene glycol	Ethylene glycol	1.1132	62.07
EtOAc	Ethyl Acetate	0.902	88.11
EtOH	Ethanol	0.7893	46.07
HCl	Hydrochloric acid	1.49	36.46
Heptane	n-Heptane	0.6795	100.21
Hexanes	Hexanes	0.6606	86.18
i-PrOH	Isopropanol	0.786	60.1
MeCN	Acetonitrile	0.786	41.05
MeOH	Methanol	0.792	32.04
Me-THF	2-Methyltetrahydrofuran	0.854	86.13
MgSO4	MgSO4	-	120.37
Na2SO4	Sodium sulfate	-	142.04
NaCl	Sodium chloride	-	58.44
NaHCO3	Sodium bicarbonate	-	84
NaOH	sodium hydroxide	-	40
n-BuOAc	n-Butylacetate	0.8825	116.16
Nitromethane	Nitromethane	1.1371	61.04
NMP	N-Methyl-2-pyrrolidone	1.028	99.13
Pentane	Pentane	0.626	72.15
Petrol	Petrolium ether (35 °C - 60 °C)	0.653	82.2
Pyridine	Pyridine	0.9819	79.1
Silica Gel	Silica Gel	-	60.08
Sulfolane	Sulfolane	1.261	120.17
t-BuOH	tert-Butyl alcohol	0.775	74.12
THF	Tetrahydrofuran	0.8892	72.11
Toluene	Toluene	0.87	92.14
Water	Water	1	18.02
Xylenes	Xylenes	0.864	106.16

## Sheet: Help Sheet
	Input Type	Limiting
	g	L
	mL
	mmol
	Approximations use for methods lacking specific details
	1. 100 g SiO2 per 1.0 mmol (up to 10 mmol): 50 g SiO2 per 1.0 mmol (up to 10 mmol) using automated purification system
	2. 1.0 L solvent for first 1.0 mmol and then 500 mL solvent for each mmol thereafter (up to 10 mmol) for column chromatography: 0.5 L solvent and then 250 mL solvent for each mmol thereafter (up to 10 mmol) using automated purification system
	3. 10.0 g silica gel for a "silica plug" or "filtered through silica" (up to 10 mmol)
	4. 5.0 mL per 1.0 mmol for recrystallization (up to 10 mmol)
	5. drying agent (MgSO4 or Na2SO4) 2.0 g per 1 mmol
